# Supplementary material for: Catalytic utility of a bimetallic (pincer) PNN-based nickel complex in the synthesis of quinolines and α-alkylation of ketones
Source: Royal Society of Chemistry journal article supplement (doi:10.1039/d4nj04250f), 2024-01-01
Supplement: d4nj04250f1.pdf [file d4nj04250f1.pdf]

## Supporting information

### **Catalytic utility of bimetallic (pincer) PNN based nickel complex in the synthesis of quinolines and $\alpha$ -alkylation of ketones**

Ankit Pandey and Maravanji S. Balakrishna\*

*Phosphorus Laboratory, Department of Chemistry, Indian Institute of Technology Bombay, Powai, Mumbai 400076, India.*

## Table of content

|                                                                               |         |
|-------------------------------------------------------------------------------|---------|
| Crystallographic information for complexes <b>A</b> , <b>1</b> , and <b>2</b> | S3–S4   |
| Synthesis of compound <b>A</b>                                                | S5      |
| CV data of compound <b>1</b> and <b>2</b>                                     | S6      |
| NMR, HRMS, and IR spectra of compounds <b>A</b> , <b>1</b> , and <b>2</b>     | S7– S16 |
| Controlled Experiments                                                        | S16-S18 |
| NMR spectra of catalytic products                                             | S19–S70 |
| References                                                                    | S71     |

### **Crystal structure determination of compounds A,1, and 2.**

Single crystals of all compounds were mounted on a Cryoloop with a drop of paratone oil and positioned in the cold nitrogen stream on a Bruker D8 Venture diffractometer. The data collections were performed at 100 K to 150 K using Bruker D8 Venture diffractometer with a graphite monochromated Mo K $\alpha$  radiation source ( $\lambda = 0.71073 \text{ \AA}$ ) with the  $\omega$ -scan technique. The data were reduced using CrysAlisPro Red 171.41\_64.93a software. The structures were solved using Olex2 1.5<sup>1</sup> with the ShelXT<sup>2</sup> structure solution program using intrinsic phasing and refined with the SHELXL<sup>3</sup> refinement package using least-squares minimization. All nonhydrogen atoms were refined anisotropically. Hydrogen atoms were placed in calculated positions and included as riding contributions with isotropic displacement parameters tied to those of the attached non-hydrogen atoms. The given chemical formula and other crystal data do not take into account the unknown solvent molecule(s). The reflections with error/esd more than 10 were excluded to avoid problems related to better refinement of the data. The data completeness is more than 99.8% in most of the cases, which is enough to guarantee a very good refinement of data. The details of X-ray structural determinations are given in Tables S2. The disordered solvent present in the voids of structure **2** could not be identified as a known solvent; therefore, it was SQUEEZED using PLATON. This analysis revealed 850 electrons and a volume of 3762  $\text{\AA}^3$ . The provided chemical formula and other crystallographic data do not account for the unknown solvent molecules. Reflections with error/esd greater than 10 were excluded to improve the refinement of the data. Crystallographic data for the structures reported in this paper have been deposited with the Cambridge Crystallographic Data Centre as supplementary publication no. CCDC: 2386216-2386218.

**Table S1** Crystallographic information of compounds **A**, **1** and **2**.

|                                            | <b>A</b>                                                                      | <b>1</b>                                                                     | <b>2</b>                                                                                                     |
|--------------------------------------------|-------------------------------------------------------------------------------|------------------------------------------------------------------------------|--------------------------------------------------------------------------------------------------------------|
| Formula                                    | C <sub>24</sub> H <sub>16</sub> N <sub>4</sub> O <sub>2</sub> Br <sub>2</sub> | C <sub>48</sub> H <sub>36</sub> N <sub>4</sub> O <sub>2</sub> P <sub>2</sub> | C <sub>48</sub> H <sub>34</sub> Cl <sub>2</sub> N <sub>4</sub> Ni <sub>2</sub> O <sub>2</sub> P <sub>2</sub> |
| Formula Weight                             | 552.23                                                                        | 762.75                                                                       | 949.05                                                                                                       |
| Crystal System                             | Triclinic                                                                     | Monoclinic                                                                   | Orthorhombic                                                                                                 |
| Space group                                | P-1                                                                           | P2 <sub>1</sub> /n                                                           | Pbca                                                                                                         |
| <i>a</i> , Å                               | 7.4221(6)                                                                     | 9.147(2)                                                                     | 17.2416(6)                                                                                                   |
| <i>b</i> , Å                               | 9.7208(8)                                                                     | 13.350(3)                                                                    | 16.0245(4)                                                                                                   |
| <i>c</i> , Å                               | 15.3202(14)                                                                   | 16.012(4)                                                                    | 39.9762(10)                                                                                                  |
| $\alpha$ , deg                             | 75.512(3)                                                                     | 90                                                                           | 90                                                                                                           |
| $\beta$ , deg                              | 84.689(3)                                                                     | 91.037(8)                                                                    | 90                                                                                                           |
| $\gamma$ , deg                             | 82.270(3)                                                                     | 90                                                                           | 90                                                                                                           |
| <i>V</i> , Å <sup>3</sup>                  | 1058.46(16)                                                                   | 1954.9(8)                                                                    | 11044.9(5)                                                                                                   |
| <i>Z</i>                                   | 2                                                                             | 2                                                                            | 8                                                                                                            |
| $\rho_{\text{calc}}$ , mg cm <sup>-3</sup> | 1.733                                                                         | 1.296                                                                        | 1.141                                                                                                        |
| $\mu$ (MoK $\alpha$ ), mm <sup>-1</sup>    | 3.860                                                                         | 0.157                                                                        | 0.872                                                                                                        |
| <i>F</i> (000)                             | 548.0                                                                         | 796.0                                                                        | 3888.0                                                                                                       |
| crystal size, mm                           | 0.126 × 0.042 ×<br>0.036                                                      | 0.568 × 0.062 × 0.045                                                        | 0.186 × 0.055 × 0.045                                                                                        |
| <i>T</i> (K)                               | 150                                                                           | 150                                                                          | 111.15                                                                                                       |
| 2 $\theta$ range, deg                      | 4.356 to 67.452                                                               | 3.972 to 49.996                                                              | 3.616 to 49.996                                                                                              |
| Total no. reflns                           | 69069                                                                         | 39433                                                                        | 96802                                                                                                        |
| No. of indep reflns                        | 69069                                                                         | 3434                                                                         | 9716                                                                                                         |
| on <i>F</i> <sup>2</sup>                   | 1.036                                                                         | 1.126                                                                        | 1.041                                                                                                        |
| <i>R</i> <sub>1</sub>                      | 0.0504                                                                        | 0.0541                                                                       | 0.0363                                                                                                       |
| <i>wR</i> <sub>2</sub>                     | 0.1287                                                                        | 0.1341                                                                       | 0.0788                                                                                                       |



### Synthesis of [2,2'-{C<sub>5</sub>H<sub>3</sub>N-3- N(H)C(O)-C<sub>6</sub>H<sub>4</sub>-Br-o}2] (A)

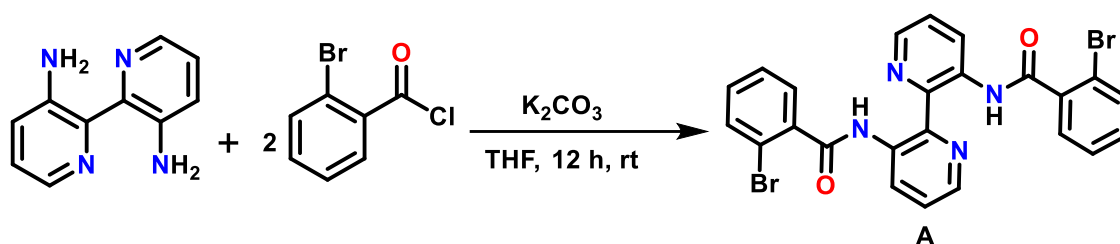

#### Scheme S1 Synthesis of A.

[2,2'-bipyridine]-3,3'-diamine (0.05g, 2.684 mmol) and K<sub>2</sub>CO<sub>3</sub> (1.113 g, 8.054 mmol) in THF were stirred under an inert atmosphere for 30 minutes. The solution of 2-bromobenzoylchloride (1.308 g, 5.906 mmol) in THF was added slowly into it and stirred for 12 hours at room temperature. After removing the solvent under vacuo, the residue was redissolved in 5 mL DMF and washed with 12 mL HCl (5% v/v) and 15 mL K<sub>2</sub>CO<sub>3</sub> (10% w/v), respectively. The residue was recovered by filtration and washed with deionized water until pH 7.0 and dried under vacuo. Single crystals of **A** suitable for X-ray analysis were obtained by slow diffusion of petroleum ether into the dichloromethane solution of **A**. Yield 1.26 g (85%). Mp >275 °C. <sup>1</sup>H NMR (400 MHz, CDCl<sub>3</sub>): δ 14.10 (s, 2H), 9.41 – 9.31 (m, 2H), 8.19 (dd, *J* = 4.6, 1.6 Hz, 2H), 7.80 – 7.62 (m, 4H), 7.51 – 7.32 (m, 6H). <sup>13</sup>C NMR (101 MHz, CDCl<sub>3</sub>): δ 166.6, 142.0, 140.8, 138.5, 136.7, 134.0, 131.6, 130.0, 129.2, 127.6, 124.2, 119.8. HRMS (ESI) Calcd for C<sub>24</sub>H<sub>17</sub>N<sub>4</sub>O<sub>2</sub>Br<sub>2</sub> ([M+H]<sup>+</sup>): 552.9703; found: 552.9703. FT-IR (KBr disk, cm<sup>-1</sup>): 3055 m (vNH) 2871 m, 1668 s (vCO), 1567 s, 1509 s, 1437 s, 1304 s. Anal. Calcd for C<sub>24</sub>H<sub>16</sub>N<sub>4</sub>O<sub>2</sub>Br<sub>2</sub>: C, 52.20; H, 2.92; N, 10.15. Found: C, 51.98; H, 2.72; N, 10.01.

The representative cyclic voltammogram along with the differential pulse voltammogram of compound **1** and **2** are given in Fig. S1. The voltammogram of compound **1** showed two irreversible oxidation potential and one irreversible reduction potential at 0.89 V, 1.25 V, and -1.89 V respectively, whereas compound **2** showed one irreversible oxidation potential and irreversible reduction potential at 1.49 V and -1.28 V, respectively. This lower oxidation potential means that compound **1** is more readily oxidized, which supports the stability and formation of metal complex **2**.

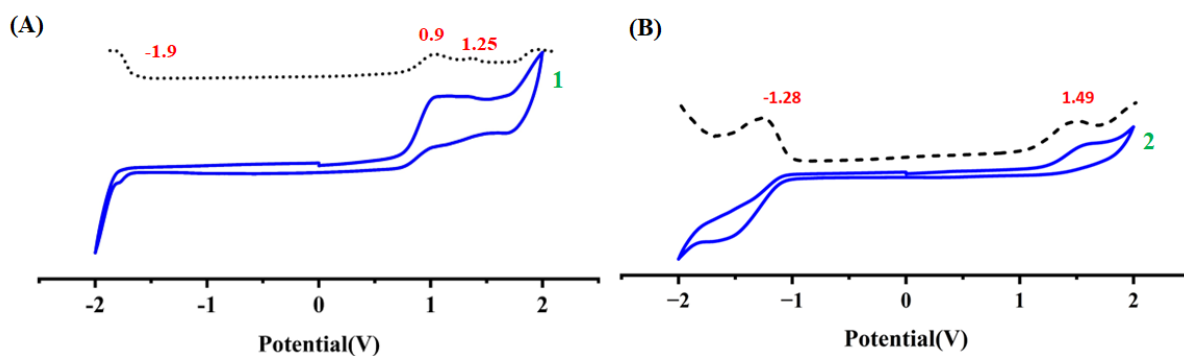

**Fig. S1** Cyclic voltammogram of (A) compound **1** and (B) compound **2** recorded using polarographic convention in dichloromethane containing supporting electrolyte (0.1 M TBAP) and the analyte ( $10^{-3}$  M) at scan rates of  $50 \text{ mVs}^{-1}$  at  $25^\circ\text{C}$ . Saturated calomel electrode (SCE), glassy carbon and platinum wire were used as the reference electrode, working electrode and auxiliary electrode, respectively. For plotting CV starting at 0 V, the polarographic convention has been followed.

## NMR, HRMS and IR spectra

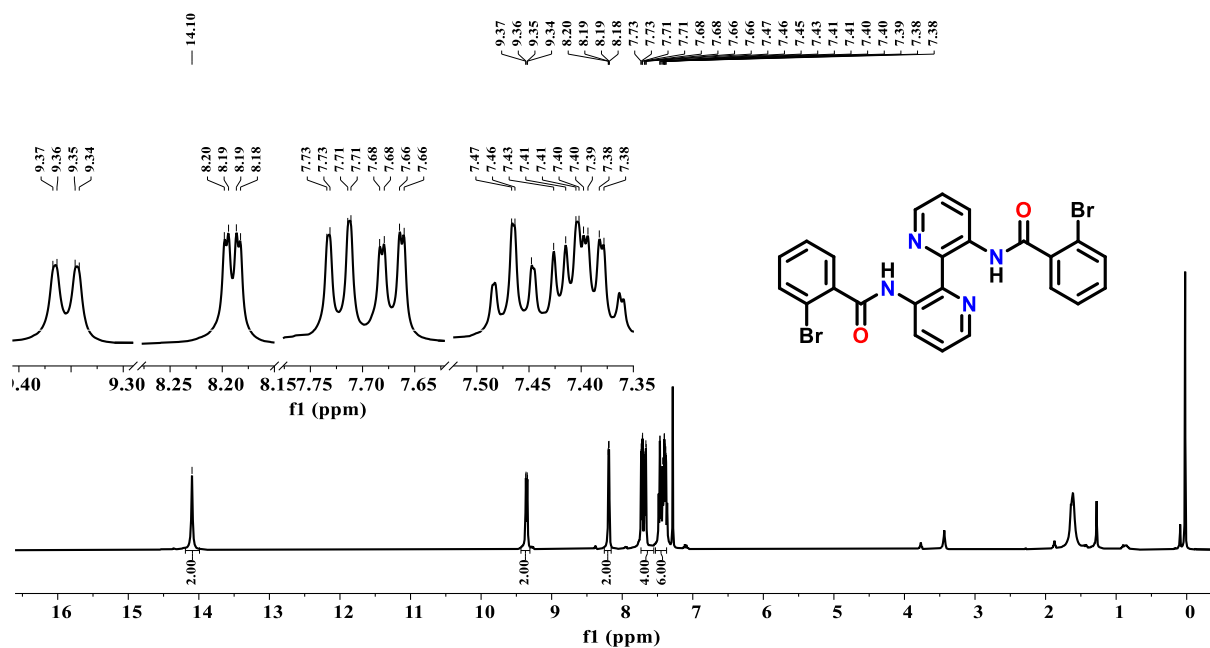

**Fig. S2** <sup>1</sup>H NMR spectrum of A in CDCl<sub>3</sub> (400 MHz).

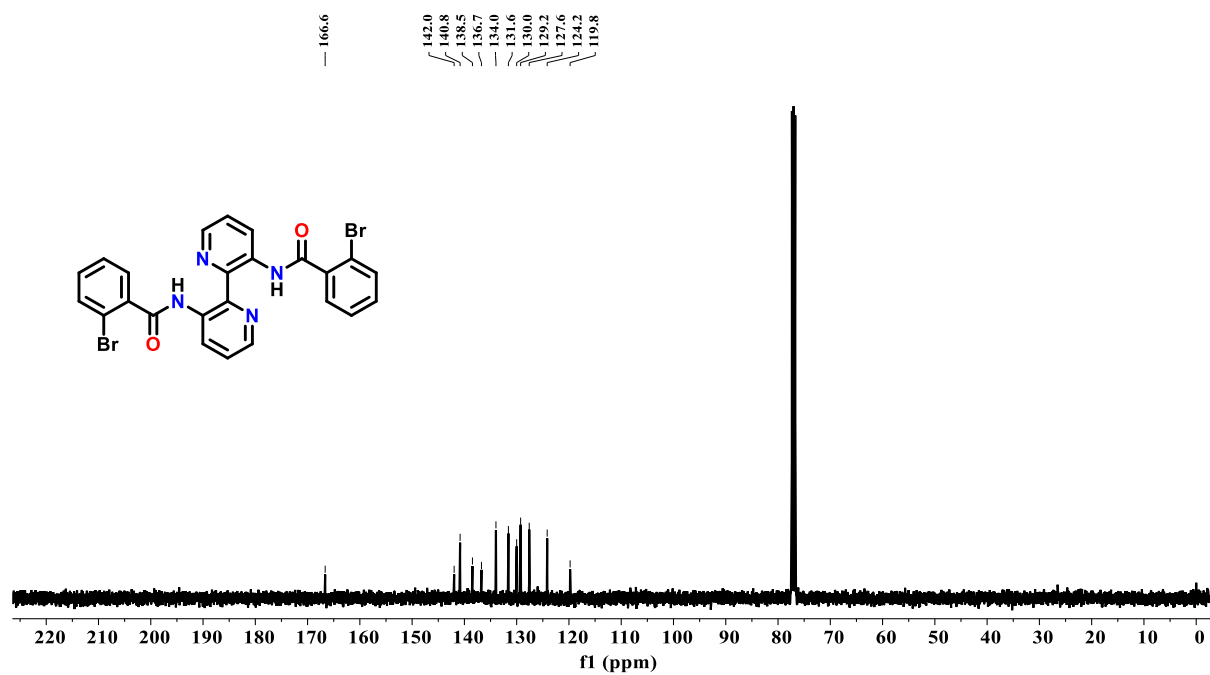

**Fig. S3** <sup>13</sup>C{<sup>1</sup>H} NMR spectrum of A in CDCl<sub>3</sub> (101 MHz).

**Sample Information**

|                       |                 |                           |                                                                |
|-----------------------|-----------------|---------------------------|----------------------------------------------------------------|
| <b>Name</b>           | MSB-AP-L2SM     | <b>Data File Path</b>     | X:\Projects\MASS Data\Data\MSB-AP-L2SM.d                       |
| <b>Sample ID</b>      |                 | <b>Acq. Time (Local)</b>  | 1/3/2024 1:14:45 PM (UTC+05:30)                                |
| <b>Instrument</b>     | LCMSQTOF-G6545B | <b>Method Path (Acq)</b>  | D:\Projects\MASS Data\Methods\A1B1_POS_100-1000_4000_500_120.m |
| <b>MS Type</b>        | QTOF            | <b>Version (Acq SW)</b>   | 6200 series TOF/6: Q-TOF (11.0.203.0)                          |
| <b>Inj. Vol. (ul)</b> | 0.3             | <b>IRM Status</b>         | Success                                                        |
| <b>Position</b>       | P1-D8           | <b>Method Path (DA)</b>   | D:\MassHunter\Rej\lates\REPORT METHOD\HRMS_IITB_1.m            |
| <b>Plate Pos.</b>     |                 | <b>Target Source Path</b> |                                                                |
| <b>Operator</b>       | SYSTEM (SYSTEM) | <b>Result Summary</b>     | 1 qualified (1 targets)                                        |

**Sample Spectra****+ Scan (rt: 0.226-0.375 min) Peak 1 from + TIC Scan**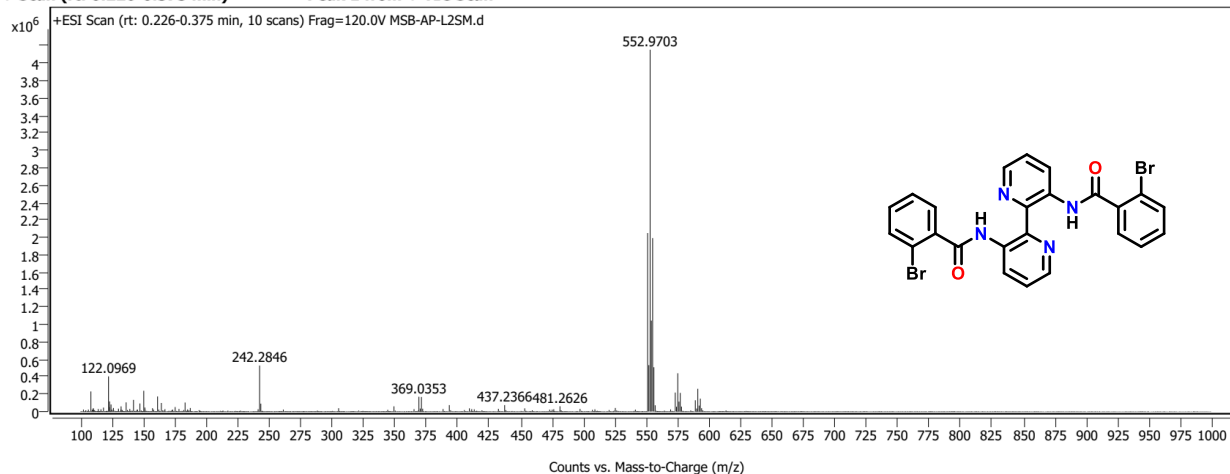**Compound Details****Cpd. 1: C24 H16 Br2 N4 O2**

| Formula           | m/z      | Observed M/Z     | Difference Da     | Difference PPM   | Score |
|-------------------|----------|------------------|-------------------|------------------|-------|
| C24 H16 Br2 N4 O2 | 552.9703 | 552.970346376488 | 0.789629619816878 | 1.43578419231392 | 98.14 |

**Compound Spectra (Zoomed)**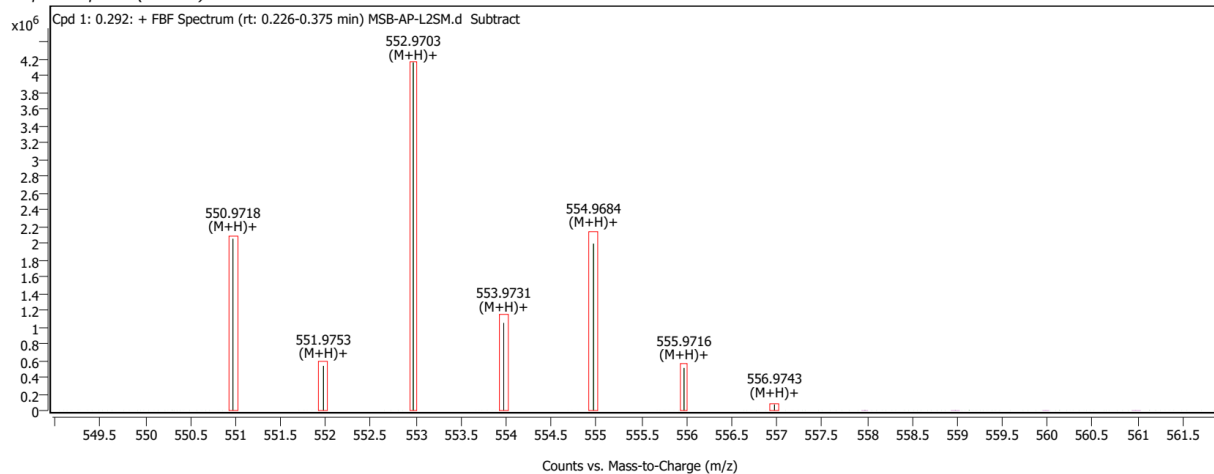

MassHunter Qual 10.0  
(End of Report)

**Fig. S4** HRMS spectrum of **A**.

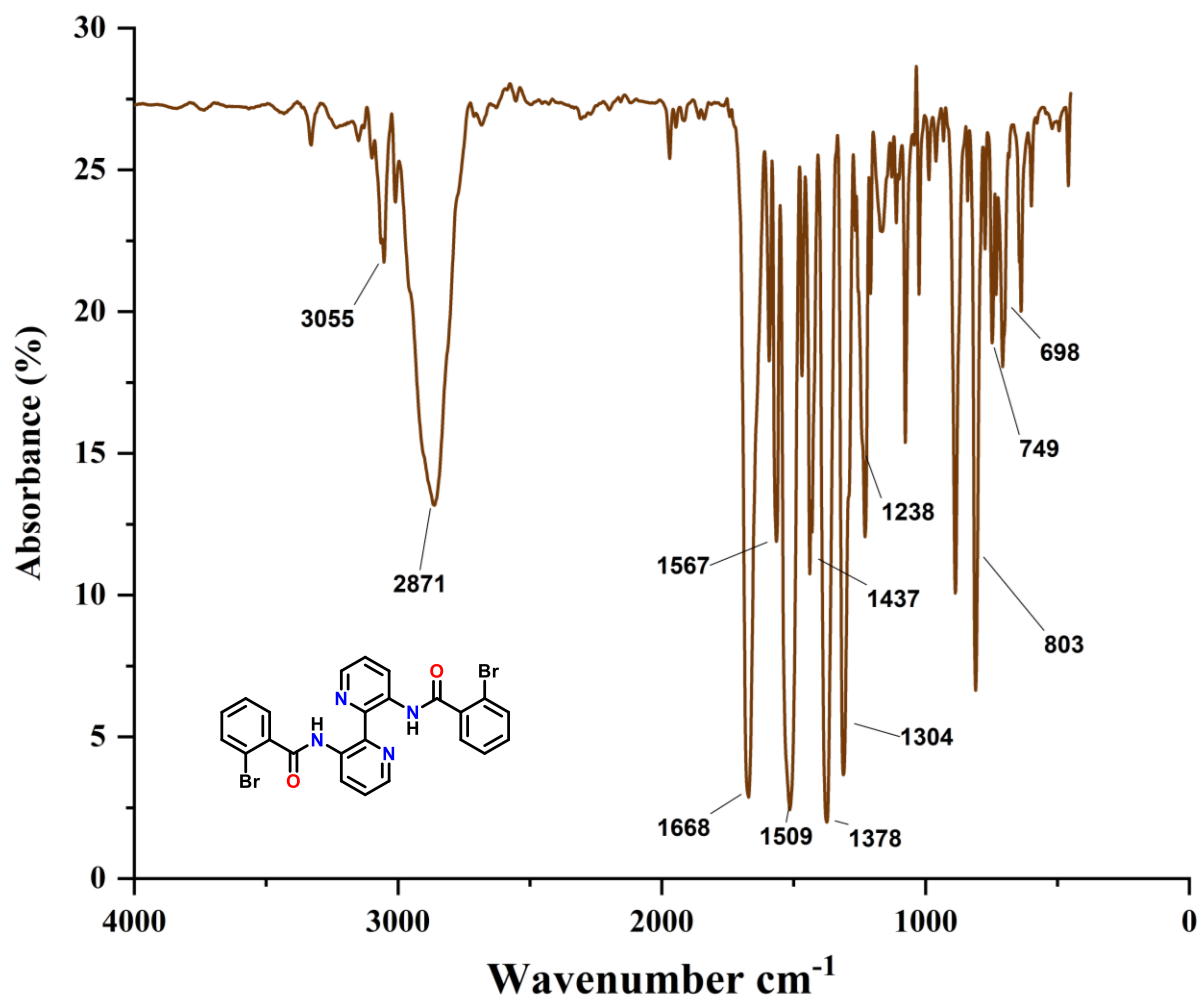

Fig. S5 FT-IR spectrum of A.

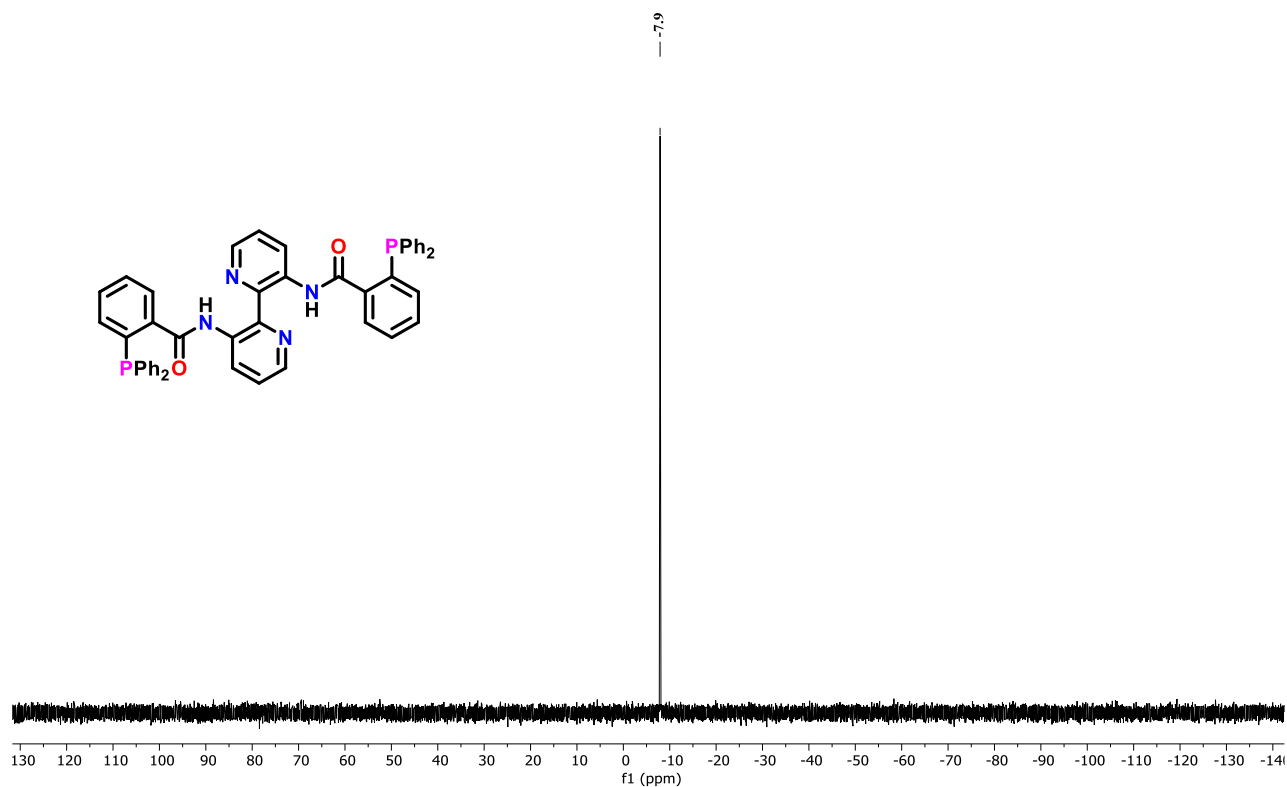

**Fig. S6**  $^{31}\text{P}\{^1\text{H}\}$  NMR spectrum of **1** in  $\text{CDCl}_3$  (202 MHz).

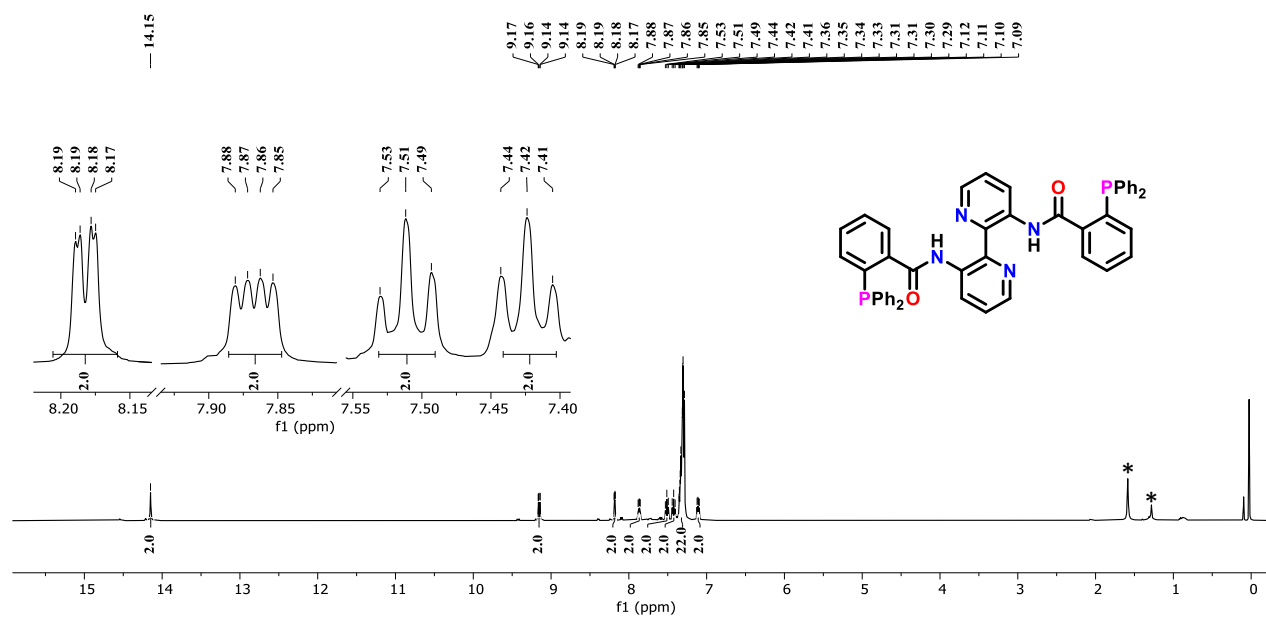

**Fig. S7**  $^1\text{H}$  NMR spectrum of **1** in  $\text{CDCl}_3$  (400 MHz). Asterisk indicates the residual solvent peak.

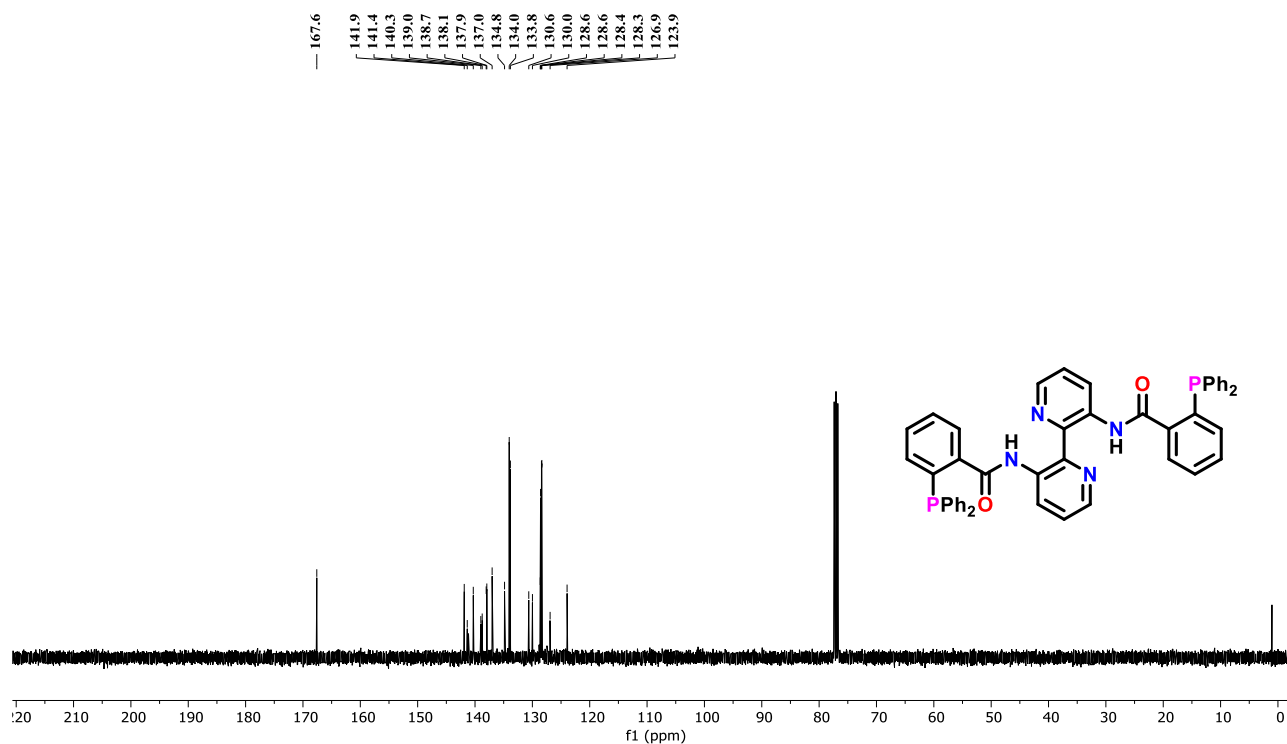

**Fig. S8**  $^{13}\text{C}\{^1\text{H}\}$  NMR spectrum of **1** in  $\text{CDCl}_3$  (101 MHz).

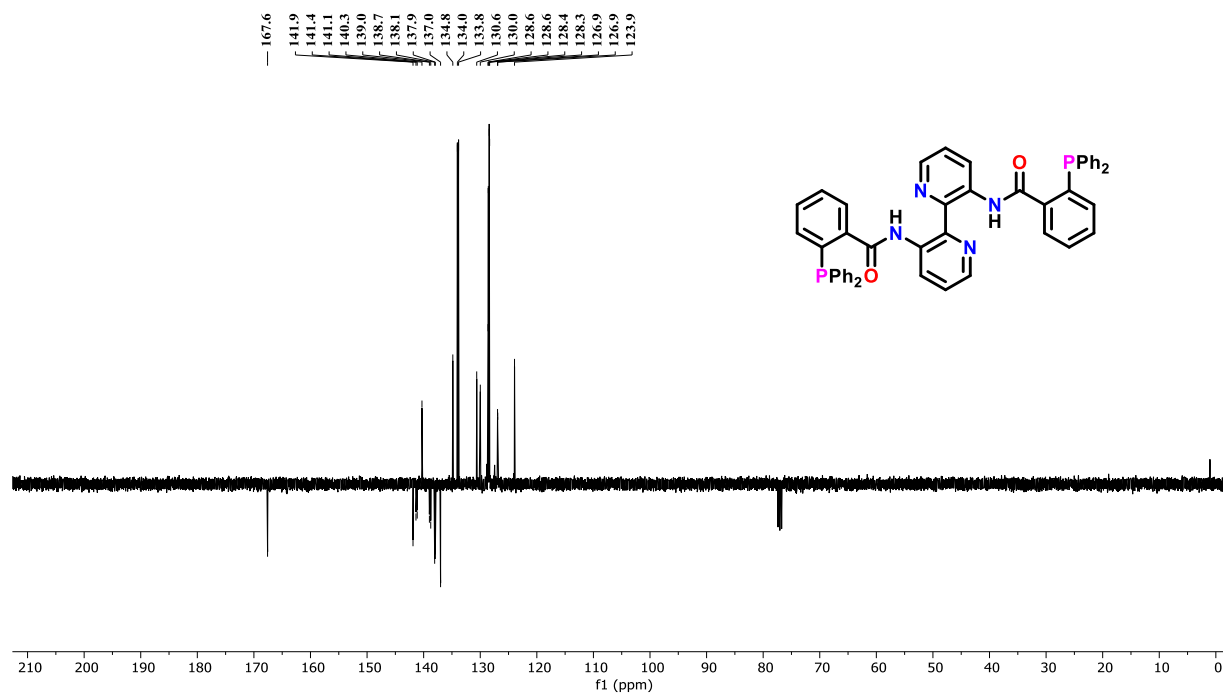

**Fig. S9** APT NMR spectrum of **1** in  $\text{CDCl}_3$  (101 MHz).

**Sample Information**

|                       |                 |                           |                                                                |
|-----------------------|-----------------|---------------------------|----------------------------------------------------------------|
| <b>Name</b>           | MSB-AP-NIL2-1   | <b>Data File Path</b>     | X:\Projects\MASS Data\Data\MSB-AP-NIL2-1.d                     |
| <b>Sample ID</b>      |                 | <b>Acq. Time (Local)</b>  | 12/29/2023 11:51:39 AM (UTC+05:30)                             |
| <b>Instrument</b>     | LCMSQTOF-G6545B | <b>Method Path (Acq)</b>  | D:\Projects\MASS Data\Methods\A2B2_POS_100-1500_4000_800_150.m |
| <b>MS Type</b>        | QTOF            | <b>Version (Acq SW)</b>   | 6200 series TOF/6500 series Q-TOF (11.0.203.0)                 |
| <b>Inj. Vol. (ul)</b> | 0.3             | <b>IRM Status</b>         | Success                                                        |
| <b>Position</b>       | P1-A4           | <b>Method Path (DA)</b>   | D:\MassHunter\Report Templates\REPORT METHOD\HRMS_IITB.m       |
| <b>Plate Pos.</b>     |                 | <b>Target Source Path</b> |                                                                |
| <b>Operator</b>       | SYSTEM (SYSTEM) | <b>Result Summary</b>     | 1 qualified (1 targets)                                        |

**Sample Spectra**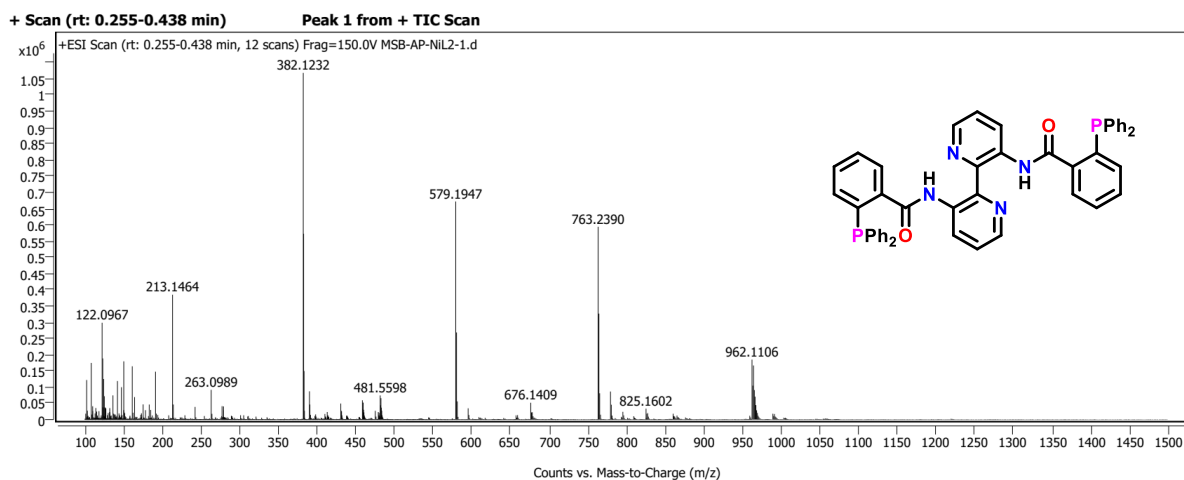**Compound Details**

Cpd. 1: C48 H36 N4 O2 P2

| Formula          | m/z      | Observed M/Z     | Difference Da     | Difference PPM    | Score |
|------------------|----------|------------------|-------------------|-------------------|-------|
| C48 H36 N4 O2 P2 | 763.2390 | 763.238979384372 | 0.500192351410078 | 0.656221174584468 | 99.19 |

**Compound Spectra (Zoomed)**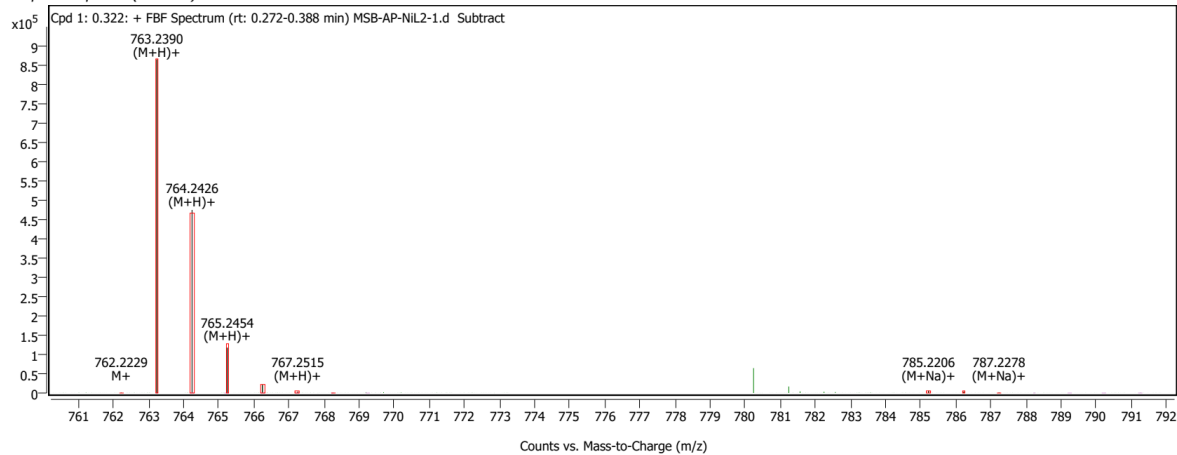

MassHunter Qual 10.0  
(End of Report)

Fig. S10 HRMS spectrum of 1.



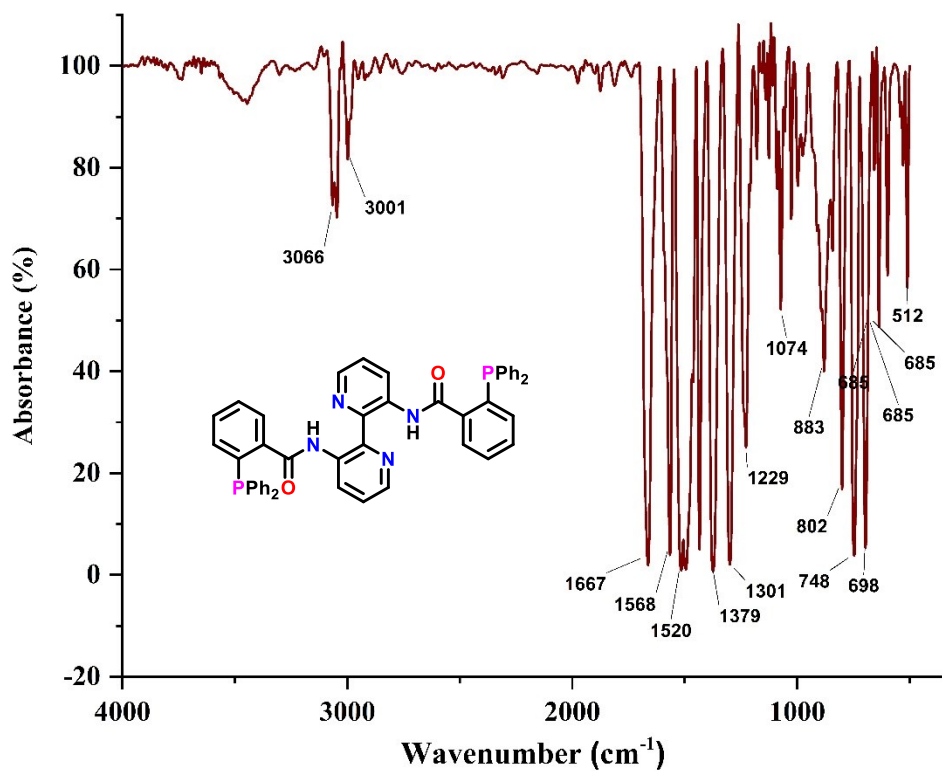

Fig. S11 FT-IR spectrum of 1.

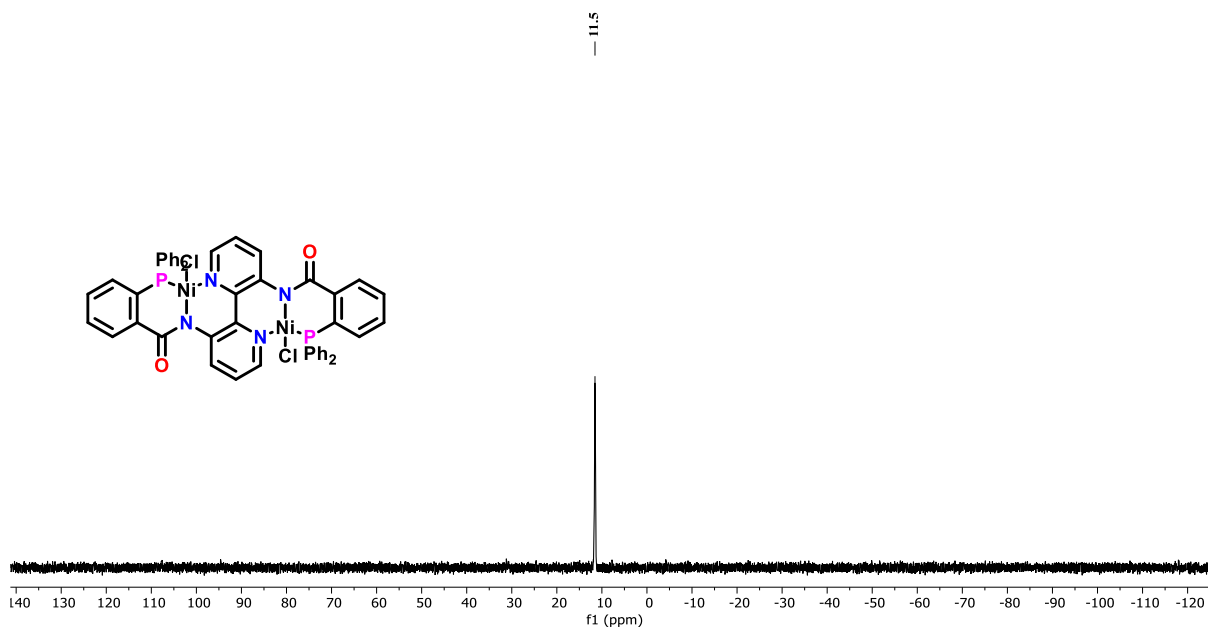

Fig. S12  $^{31}\text{P}\{^1\text{H}\}$  NMR spectrum of 2 in  $\text{CDCl}_3$  (202 MHz).



**Sample Information**

|                       |                 |                           |                                                                |
|-----------------------|-----------------|---------------------------|----------------------------------------------------------------|
| <b>Name</b>           | MSB-AP-NIL2     | <b>Data File Path</b>     | D:\Projects\MASS Data\Data\MAY-24\MSB-AP-NIL2.d                |
| <b>Sample ID</b>      |                 | <b>Acq. Time (Local)</b>  | 07-05-2024 16:58:37 (UTC+05:30)                                |
| <b>Instrument</b>     | LCMSQTOF-G6545B | <b>Method Path (Acq)</b>  | D:\Projects\MASS Data\Methods\A1B1_POS_100-1500_4000_800_220.m |
| <b>MS Type</b>        | QTOF            | <b>Version (Acq SW)</b>   | 6200 series TOF/6500 series Q-TOF (11.0.203.0)                 |
| <b>Inj. Vol. (ul)</b> | 0.5             | <b>IRM Status</b>         | Success                                                        |
| <b>Position</b>       | P2A1            | <b>Method Path (DA)</b>   | D:\MassHunter\Report Templates\REPORT METHOD\HRMS_1.m          |
| <b>Plate Pos.</b>     |                 | <b>Target Source Path</b> |                                                                |
| <b>Operator</b>       | SYSTEM (SYSTEM) | <b>Result Summary</b>     | 1 qualified (1 targets)                                        |

**Compound Details**

Cpd. 1: C48 H34 Cl2 N4 Ni2 O2 P2

| Formula                  | m/z      | Observed M/Z     | Difference Da     | Difference PPM    | Score |
|--------------------------|----------|------------------|-------------------|-------------------|-------|
| C48 H34 Cl2 N4 Ni2 O2 P2 | 986.9850 | 986.984957635703 | 0.702212846249495 | 0.742277967476326 | 99.08 |

*Compound Spectra (Zoomed)*

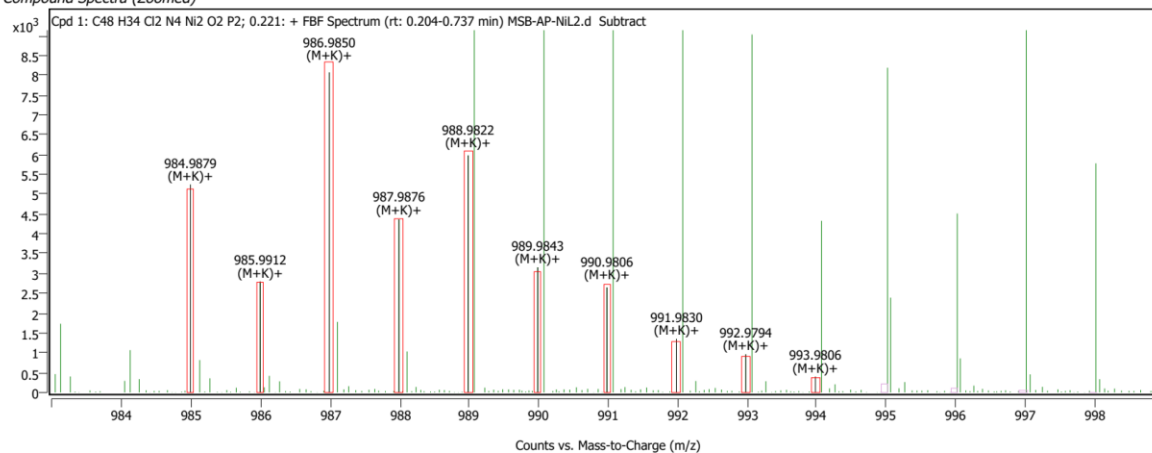

MassHunter Qual 10.0  
(End of Report)

Fig. S15 HRMS spectrum of 2.

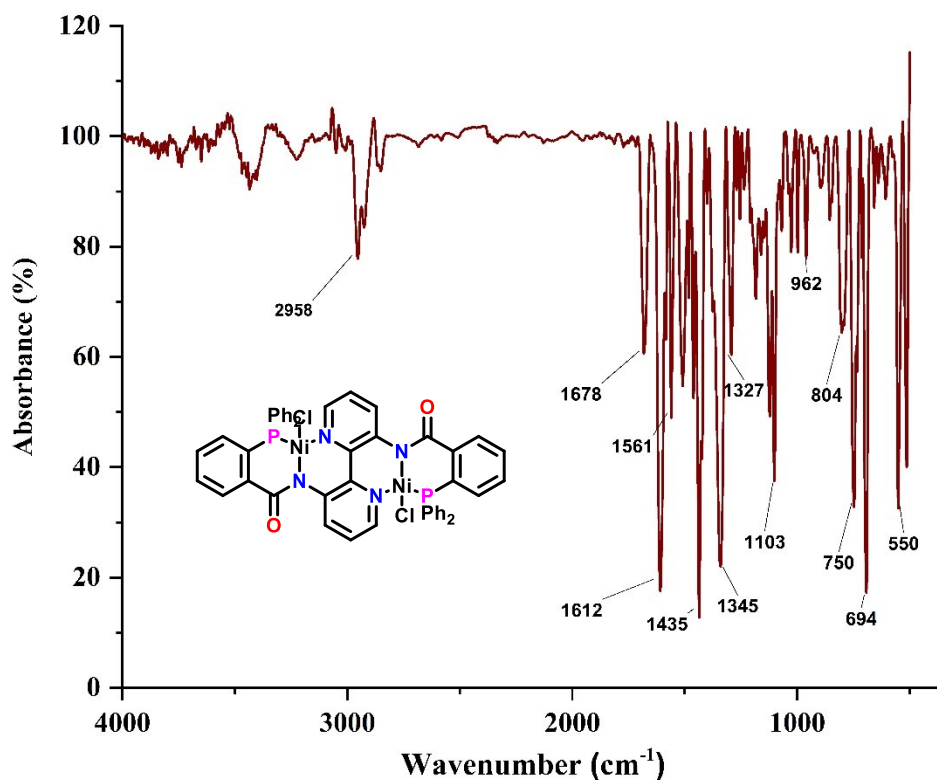

**Fig. S16** FT-IR spectrum of **2**.

## Controlled Experiments

### Evolution of H<sub>2</sub> gas

In an oven-dried catalytic tube, the mixture of 2-aminobenzyl alcohol **2a** (3 mmol), catalyst-**2** (0.5 mol%), and K<sup>t</sup>OBu (1 equiv) was taken in toluene (1 mL). The tube was sealed with a septum cap, evacuated, and filled with inert gas. The tube was then placed in an oil bath and heated at 110 °C. After 3.5 hours, gas was taken by syringe, and GC analysis was done, which showed peak of H<sub>2</sub> which indicates the evolution of H<sub>2</sub> gas during the reaction. After 6 h of reaction time GC-MS of the reaction mixture was taken which showed the formation of the 2-aminobenzaldehyde.

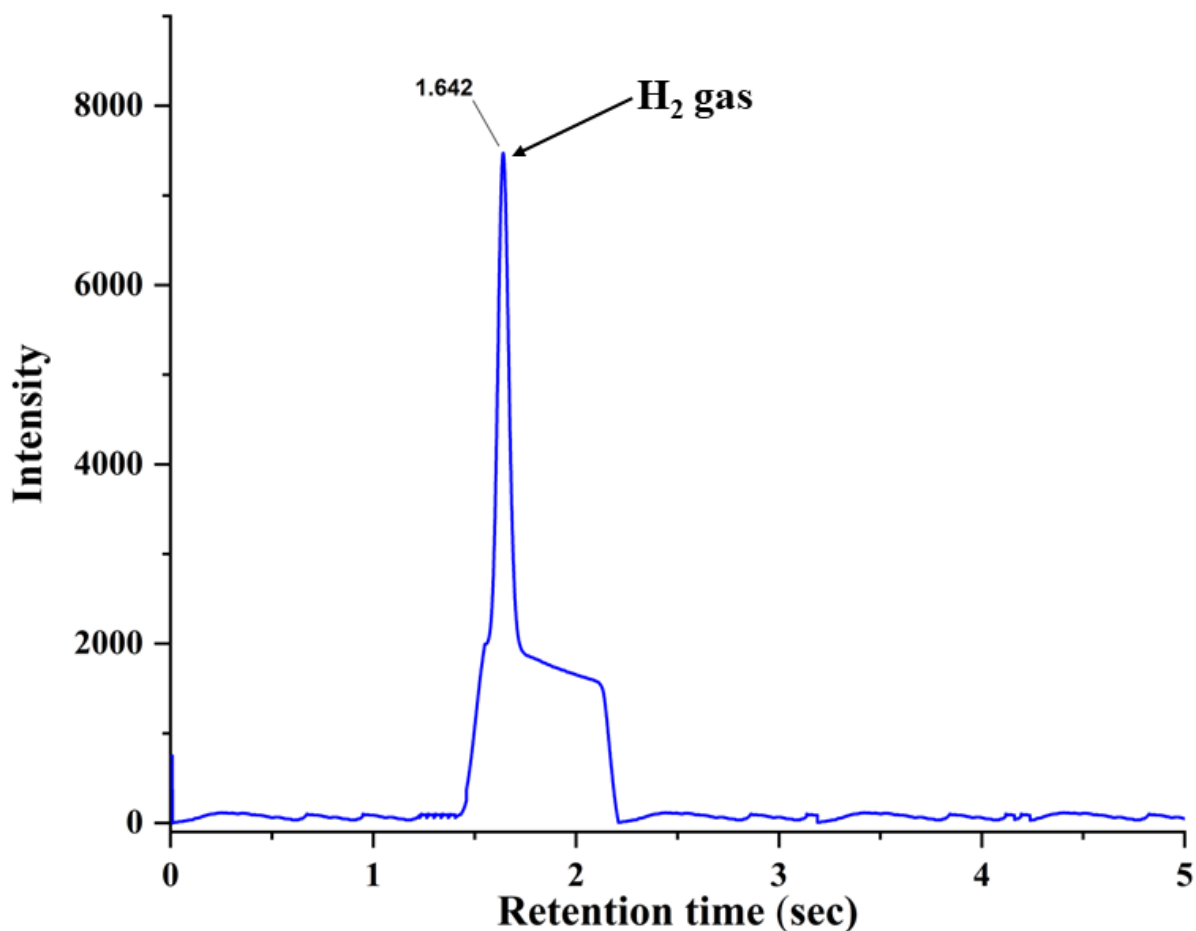

**Fig. S17** Evidence of H<sub>2</sub> evolution from the independent reaction after 1.5 h.

#### **Hydrogenation of styrene by evolved hydrogen:**

In a H-shaped catalytic tube, mixture of 2-aminobenzyl alcohol (**1a**) (2.0 mmol), **2** (0.5 mol%), KO<sup>t</sup>Bu (1.0 equiv), and toluene (2 mL) was taken in one catalytic tube and styrene (1.0 mmol), Pd/C (10 mol%) and THF with a magnetic stirrer were placed in second catalytic tube. The tubes were capped with a Teflon screw cap, evacuated, and filled with nitrogen. The first tube was then placed in an oil bath and heated at 110 °C for 10 h and put the second tube at room temperature. GC-MS analysis of the reaction mixture present in the second catalytic tube containing styrene revealed the conversion of styrene to ethylbenzene.

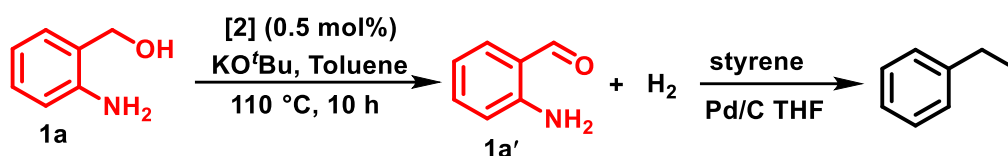

**Scheme S2** Control experiments in the presence of external hydrogen acceptor.

#### Detectin of Ni-H Intermediate:

**Procedure A:** In an oven dried catalytic tube mixture of 2-aminobenzyl alcohol (0.5 mmol) Acetophenone (0.55 mmol), Ni2 (0.5 mol%) and KO<sup>t</sup>Bu (1.0 equiv) was taken in toluene. The reaction mixture was degassed and purged with nitrogen gas and then subjected to heat at 110 °C for 2 hour. After that aliquot was taken and HRMS analysis was carried out, which showed a peak at 901.0193 corresponds to Nickel hydride [ $\{\text{PNNNiH}\}_2 + \text{Na}\}^+$  species.

**Procedure B:** To an oven-dried J. Young NMR tube were added 2-aminobenzyl alcohol (0.2 mmol) [2] (0.5 mol%) and C<sub>6</sub>D<sub>6</sub> (0.4 mL) in the glove-box. Heat the reaction mixture and take NMR readings at different time intervals; however, despite multiple attempts at various temperatures, no successful peak corresponding to the Ni-hydride was observed (Fig. 96 and 97).

**Procedure C:** Under an argon atmosphere, a suspension of compound **2** (30 mg, 0.03 mmol) and LiAlH<sub>4</sub> (48 mg, 0.63 mmol) in 15 mL of toluene was stirred at room temperature for 24 h. The resulting mixture was filtered through Celite pad, giving an orange solution. The solvent was removed under vacuum, and the residue was rinsed with chilled (0 °C) deoxygenated methanol(0.6 mL × 2). In the <sup>1</sup>H NMR spectrum, peaks corresponding to complex **2** were observed, and no peaks corresponding to Ni-hydride were detected.

## NMR spectral data of catalytic products

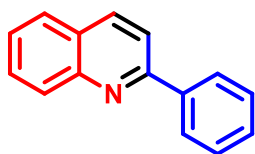

**2-Phenylquinoline (3a)**<sup>4</sup> Purified by column chromatography on silica gel using petroleum ether as eluent 98% (90 mg) yielded as white solid. <sup>1</sup>H NMR (500 MHz, CDCl<sub>3</sub>) δ 8.26 – 8.19 (m, 4H), 7.90 (d, *J* = 8.6 Hz, 1H), 7.86 (dd, *J* = 8.1, 1.4 Hz, 1H), 7.77 (ddd, *J* = 8.4, 6.8, 1.5 Hz, 1H), 7.59 – 7.54 (m, 3H), 7.53 – 7.48 (m, 1H). <sup>13</sup>C NMR (126 MHz, CDCl<sub>3</sub>) δ 157.4, 148.3, 139.7, 136.8, 129.8, 129.7, 129.4, 128.9, 127.6, 127.5, 127.2, 126.3, 119.0. HRMS (ESI) Calcd for C<sub>15</sub>H<sub>11</sub>N ([M+H]<sup>+</sup>): 206.0964; found: 206.0694.

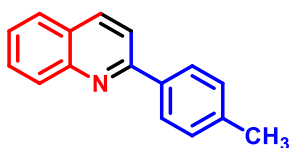

**2-(4-Tolyl)quinoline (3b)**<sup>4</sup> Purified by column chromatography on silica gel using petroleum ether and 2% ethyl acetate as eluents, 94 % (92 mg) yielded as white solid. <sup>1</sup>H NMR (400 MHz, CDCl<sub>3</sub>) δ 8.21 (td, *J* = 9.0, 0.9 Hz, 2H), 8.11 (d, *J* = 8.2 Hz, 2H), 7.90 – 7.82 (m, 2H), 7.74 (ddd, *J* = 8.4, 6.9, 1.5 Hz, 1H), 7.54 (ddd, *J* = 8.0, 6.9, 1.2 Hz, 1H), 7.36 (d, *J* = 7.9 Hz, 2H), 2.47 (s, 3H). <sup>13</sup>C NMR (101 MHz, CDCl<sub>3</sub>) δ 157.3, 148.3, 139.4, 136.9, 136.6, 129.6, 129.5, 127.4, 127.1, 126.7, 126.5, 126.1, 118.9, 21.4. HRMS (ESI) Calcd for C<sub>16</sub>H<sub>13</sub>N ([M+H]<sup>+</sup>): 220.1120; found: 220.1121.

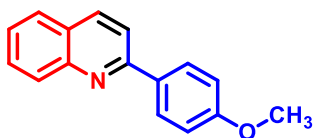

**2-(4-Methoxyphenyl)quinoline (3c)**<sup>4</sup> Purified by column chromatography on silica gel using petroleum ether and 5% ethyl acetate as eluents, 93 % (98 mg) yielded as white solid. <sup>1</sup>H NMR (400 MHz, CDCl<sub>3</sub>) δ 8.21 – 8.14 (m, 4H), 7.83 (dd, *J* = 10.0, 8.4 Hz, 2H), 7.74 (ddd, *J* = 8.3, 6.9, 1.5 Hz, 1H), 7.52 (ddd, *J* = 8.0, 6.9, 1.2 Hz, 1H), 7.07 (d, *J* = 8.9 Hz, 2H), 3.90 (s, 3H). <sup>13</sup>C NMR (101 MHz, CDCl<sub>3</sub>) δ 160.8, 156.9, 148.3, 136.7, 132.3, 129.6, 129.5, 128.9, 127.5, 126.9, 125.9, 118.6, 114.3, 55.4. HRMS (ESI) Calcd for C<sub>16</sub>H<sub>13</sub>NO ([M+H]<sup>+</sup>): 236.1069; found: 236.1069.

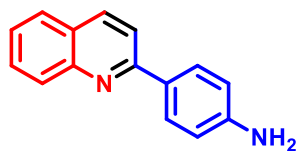

**2-(4-Aminophenyl)quinoline (3d)**<sup>5</sup> Purified by column chromatography on silica gel using petroleum ether and 10 % ethyl acetate as eluents, 89 % (88 mg) yielded as yellow solid. <sup>1</sup>H NMR (400 MHz, CDCl<sub>3</sub>) δ 8.19 – 8.11 (m, 2H), 8.08 – 8.03 (m, 2H), 7.85 – 7.79 (m, 2H), 7.71 (ddd, *J* = 8.4, 6.9, 1.5 Hz, 1H), 7.49 (ddd, *J* = 8.1, 6.9, 1.2 Hz, 1H), 6.84 (d, *J* = 8.7 Hz, 2H), 3.90 (s, 2H). <sup>13</sup>C NMR (126 MHz, CDCl<sub>3</sub>) δ 157.2, 148.3, 147.8, 136.5, 129.9, 129.4, 129.4, 128.8, 127.4, 126.8, 125.6, 118.4, 115.1. HRMS (ESI) Calcd for C<sub>15</sub>H<sub>12</sub>N<sub>2</sub> ([M+H]<sup>+</sup>): 221.1073; found: 221.1072.

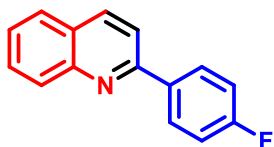

**2-(4-Fluorophenyl)quinoline (3e)**<sup>4</sup> Purified by column chromatography on silica gel using petroleum ether and 8% ethyl acetate as eluents, 89 % (89 mg) yielded as white solid. <sup>1</sup>H NMR (400 MHz, CDCl<sub>3</sub>) δ 8.29 – 8.12 (m, 4H), 7.85 (dd, *J* = 8.4, 1.7 Hz, 2H), 7.76 (ddd, *J* = 8.4, 6.9, 1.5 Hz, 1H), 7.56 (ddd, *J* = 8.1, 6.9, 1.2 Hz, 1H), 7.28 – 7.21 (m, 2H). <sup>13</sup>C NMR (101 MHz, CDCl<sub>3</sub>) δ 165.1, 162.6, 156.3, 148.2, 136.9, 129.8, 129.7, 129.5, 129.4, 127.5, 126.4, 118.7, 115.9, 115.7. <sup>19</sup>F NMR (376 MHz, CDCl<sub>3</sub>) δ -112.. HRMS (ESI) Calcd for C<sub>15</sub>H<sub>10</sub>NF ([M+H]<sup>+</sup>): 224.0872; found: 224.0871.

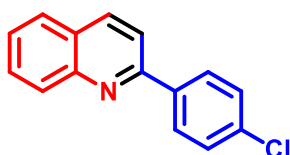

**2-(4-Chlorophenyl)quinoline (3f)**<sup>6</sup> Purified by column chromatography on silica gel using petroleum ether and 5% ethyl acetate as eluents, 91 % (98 mg) yielded as white solid. <sup>1</sup>H NMR (400 MHz, CDCl<sub>3</sub>) δ 8.21 (ddt, *J* = 16.6, 8.4, 1.0 Hz, 2H), 8.17 – 8.12 (m, 2H), 7.84 (dd, *J* = 8.6, 1.2 Hz, 2H), 7.76 (ddd, *J* = 8.5, 6.9, 1.5 Hz, 1H), 7.61 – 7.48 (m, 3H). <sup>13</sup>C NMR (101 MHz, CDCl<sub>3</sub>) δ 156.0, 148.2, 138.0, 136.9, 135.6, 129.9, 129.7, 129.0, 128.84, 127.5, 127.2, 126.5, 118.6. HRMS (ESI) Calcd for C<sub>15</sub>H<sub>10</sub>NCl ([M+H]<sup>+</sup>): 240.0574; found: 240.0574.

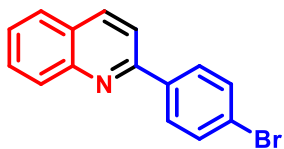

**2-(4-Bromophenyl)quinoline (3g)**<sup>6</sup> Purified by column chromatography on silica gel using petroleum ether and 8% ethyl acetate as eluents, 92 % (117 mg) yielded as white solid. <sup>1</sup>H NMR (400 MHz, CDCl<sub>3</sub>) δ 8.24 – 8.17 (m, 2H), 8.09 – 8.04 (m, 2H), 7.84 (ddd, *J* = 8.6, 2.9, 1.1 Hz, 2H), 7.76 (ddd, *J* = 8.4, 6.9, 1.5 Hz, 1H), 7.71 – 7.63 (m, 2H), 7.56 (ddd, *J* = 8.1, 6.8, 1.2 Hz, 1H). <sup>13</sup>C NMR (101 MHz, CDCl<sub>3</sub>) δ 156.0, 148.2, 138.5, 137.0, 132.0, 129.8, 129.7, 129.1, 127.5, 127.2, 126.5, 123.9, 118.5. HRMS (ESI) Calcd for C<sub>15</sub>H<sub>10</sub>NBr ([M+H]<sup>+</sup>): 284.0069; found: 284.0068.

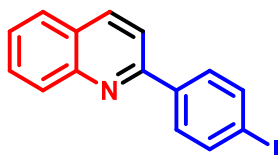

**2-(4-Iodophenyl)quinoline (3h)**<sup>6</sup> Purified by column chromatography on silica gel using petroleum ether and 10% ethyl acetate as eluents, 91 % (135 mg) yielded as white solid. <sup>1</sup>H NMR (400 MHz, CDCl<sub>3</sub>) δ 8.23 – 8.16 (m, 2H), 7.95 – 7.85 (m, 4H), 7.85 – 7.80 (m, 2H), 7.76 (ddd, *J* = 8.4, 6.9, 1.5 Hz, 1H), 7.56 (ddd, *J* = 8.1, 6.9, 1.2 Hz, 1H). <sup>13</sup>C NMR (101 MHz, CDCl<sub>3</sub>) δ 156.1, 148.3, 139.1, 137.9, 136.9, 129.8, 129.7, 129.2, 127.5, 127.3, 126.6, 118.5, 95.9. HRMS (ESI) Calcd for C<sub>15</sub>H<sub>10</sub>NI ([M+H]<sup>+</sup>): 331.9930; found: 331.9931.



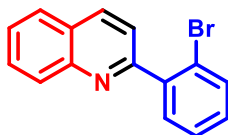

**2-(2-Bromophenyl)quinoline (3i)**<sup>7</sup> Purified by column chromatography on silica gel using petroleum ether and 5% ethyl acetate as eluents, 92 % (117 mg) yielded as yellow solid. <sup>1</sup>H NMR (400 MHz, CDCl<sub>3</sub>) δ 8.27 (dd, *J* = 8.7, 0.8 Hz, 1H), 8.24 – 8.18 (m, 3H), 7.92 (d, *J* = 8.6 Hz, 1H), 7.86 (d, *J* = 1.5 Hz, 1H), 7.76 (s, 1H), 7.57 (dt, *J* = 8.0, 1.1 Hz, 3H). <sup>13</sup>C NMR (101 MHz, CDCl<sub>3</sub>) δ 157.4, 148.2, 139.6, 136.9, 129.8, 129.6, 129.5, 129.4, 128.9, 127.6, 127.5, 127.2, 126.4, 119.0, 115.7. HRMS (ESI) Calcd for C<sub>15</sub>H<sub>10</sub>NBr ([M+H]<sup>+</sup>): 284.0069; found: 284.0069.

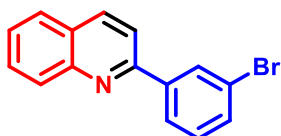

**2-(3-Bromophenyl)quinoline (3j)**<sup>8</sup> Purified by column chromatography on silica gel using petroleum ether and ethyl acetate as eluents, 83 % (106 mg) yielded as yellow solid. <sup>1</sup>H NMR (400 MHz, CDCl<sub>3</sub>) δ 8.38 (t, *J* = 1.9 Hz, 1H), 8.25 (dd, *J* = 8.6, 0.8 Hz, 1H), 8.20 (dq, *J* = 8.4, 0.9 Hz, 1H), 8.10 (ddd, *J* = 7.8, 1.7, 1.0 Hz, 1H), 7.86 (d, *J* = 8.5 Hz, 2H), 7.77 (ddd, *J* = 8.4, 6.9, 1.5 Hz, 1H), 7.63 – 7.55 (m, 2H), 7.41 (t, *J* = 7.9 Hz, 1H). <sup>13</sup>C NMR (101 MHz, CDCl<sub>3</sub>) δ 155.6, 148.2, 141.7, 137.1, 132.2, 130.7, 130.3, 129.9, 129.8, 127.5, 127.4, 126.7, 126.0, 123.2, 118.7. HRMS (ESI) Calcd for C<sub>15</sub>H<sub>10</sub>NBr ([M+H]<sup>+</sup>): 284.0069; found: 284.0069.

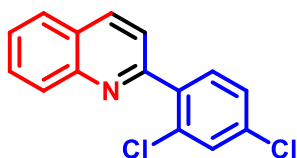

**2-(2,4-Dichlorophenyl)quinoline (3k)**<sup>9</sup> Purified by column chromatography on silica gel using petroleum ether and 15% ethyl acetate as eluents, 92 % (113 mg) yielded as white solid. <sup>1</sup>H NMR (400 MHz, CDCl<sub>3</sub>) δ 8.22 (d, *J* = 8.5 Hz, 1H), 8.16 (dq, *J* = 8.5, 1.0 Hz, 1H), 7.87 (dd, *J* = 8.2, 1.5 Hz, 1H), 7.78 – 7.71 (m, 2H), 7.67 (d, *J* = 8.3 Hz, 1H), 7.59 (ddd, *J* = 8.1, 6.9, 1.2 Hz, 1H), 7.54 (d, *J* = 2.1 Hz, 1H), 7.40 (dd, *J* = 8.3, 2.1 Hz, 1H). <sup>13</sup>C NMR (101 MHz, CDCl<sub>3</sub>) δ 156.3, 148.1, 138.2, 135.9, 135.2, 133.1, 132.7, 129.9, 129.9, 129.7, 127.5, 127.6, 127.2, 126.9, 122.5. HRMS (ESI) Calcd for C<sub>15</sub>H<sub>9</sub>NCl<sub>2</sub> ([M+H]<sup>+</sup>): 274.0184; found: 274.0185.

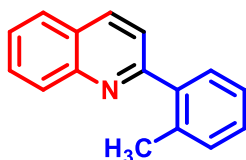

**2-(2-Methylphenyl)quinoline (3l)**<sup>8</sup> Purified by column chromatography on silica gel using petroleum ether and ethyl acetate as eluents, 87 % (86 mg) yielded a white solid. <sup>1</sup>H NMR (400 MHz, CDCl<sub>3</sub>) δ 8.21 (d, *J* = 8.4 Hz, 2H), 7.87 (dd, *J* = 8.0, 1.4 Hz, 1H), 7.76 (ddd, *J* = 8.5, 6.9, 1.5 Hz, 1H), 7.60 – 7.51 (m, 3H), 7.38 – 7.32 (m, 3H), 2.45 (s, 3H). <sup>13</sup>C NMR (101 MHz, CDCl<sub>3</sub>) δ 160.3, 147.9, 140.8, 136.1, 136.0, 130.9,

129.8, 129.7, 129.6, 128.6, 127.6, 126.8, 126.5, 126.1, 122.4, 20.4. HRMS (ESI) Calcd for  $C_{16}H_{13}N$  ( $[M+H]^+$ ): 220.1120; found: 220.1121.

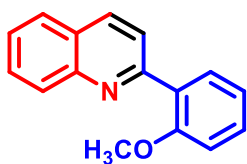

**2-(2-Methoxyphenyl)quinoline (3m)**<sup>10</sup> Purified by column chromatography on silica gel using petroleum ether and 10% ethyl acetate as eluents, 93 % (98 mg) yielded as pale yellow oil. <sup>1</sup>H NMR (400 MHz,  $CDCl_3$ )  $\delta$  8.23 – 8.15 (m, 2H), 7.93 – 7.84 (m, 3H), 7.74 (ddd,  $J = 8.4, 6.9, 1.5$  Hz, 1H), 7.55 (ddd,  $J = 8.1, 6.8, 1.2$  Hz, 1H), 7.45 (ddd,  $J = 8.2, 7.4, 1.8$  Hz, 1H), 7.19 – 7.14 (m, 1H), 7.06 (dd,  $J = 8.4, 1.0$  Hz, 1H), 3.89 (s, 3H). <sup>13</sup>C NMR (101 MHz,  $CDCl_3$ )  $\delta$  157.2, 157.1, 148.3, 135.2, 131.5, 130.4, 129.7, 129.6, 129.3, 127.4, 127.1, 126.2, 123.5, 121.3, 111.5, 55.6. HRMS (ESI) Calcd for  $C_{16}H_{13}NO$  ( $[M+H]^+$ ): 236.1069; found: 236.1068.

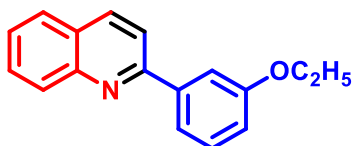

**2-(3-Ethoxyphenyl)quinoline (3n)** Purified by column chromatography on silica gel using petroleum ether and 10% ethyl acetate as eluents, 88 % (99 mg) yielded as white solid. <sup>1</sup>H NMR (400 MHz,  $CDCl_3$ )  $\delta$  8.20 (dd,  $J = 8.5, 4.8$  Hz, 2H), 7.88 – 7.80 (m, 2H), 7.78 – 7.69 (m, 3H), 7.53 (ddd,  $J = 8.1, 6.9, 1.2$  Hz, 1H), 7.43 (t,  $J = 7.9$  Hz, 1H), 7.02 (ddd,  $J = 8.2, 2.7, 0.9$  Hz, 1H), 4.18 (q,  $J = 7.0$  Hz, 2H), 1.48 (t,  $J = 7.0$  Hz, 3H). <sup>13</sup>C NMR (101 MHz,  $CDCl_3$ )  $\delta$  159.5, 157.2, 148.2, 141.1, 136.8, 129.8, 129.7, 129.7, 127.5, 127.3, 126.3, 119.9, 119.1, 115.8, 113.5, 63.6, 14.9. HRMS (ESI) Calcd for  $C_{17}H_{17}N$  ( $[M+H]^+$ ): 250.1231; found: 250.1231.

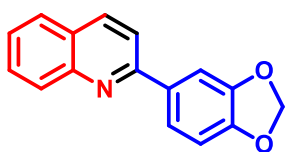

**2-(Benzodioxol-5-yl)quinoline (3o)**<sup>11</sup> Purified by column chromatography on silica gel using petroleum ether and ethyl acetate as eluents, 81 % (91 mg) yielded as white solid. <sup>1</sup>H NMR (400 MHz,  $CDCl_3$ )  $\delta$  8.19 – 8.14 (m, 2H), 7.83 – 7.77 (m, 3H), 7.75 – 7.67 (m, 2H), 7.52 (ddd,  $J = 8.1, 6.9, 1.2$  Hz, 1H), 6.97 (d,  $J = 8.1$  Hz, 1H), 6.06 (s, 2H). <sup>13</sup>C NMR (101 MHz,  $CDCl_3$ )  $\delta$  156.7, 148.9, 148.4, 148.2, 136.7, 134.2, 129.7, 129.6, 127.4, 127.0, 126.0, 121.8, 118.6, 108.5, 107.9, 101.4. HRMS (ESI) Calcd for  $C_{16}H_{11}NO_2$  ( $[M+H]^+$ ): 250.0862; found: 250.0861.

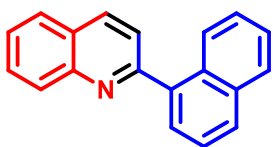

**2-Naphthylquinoline (3p)**<sup>7</sup> Purified by column chromatography on silica gel using petroleum ether and ethyl acetate as eluents, 84 % (96 mg) yielded as brown solid. <sup>1</sup>H NMR (400 MHz,  $CDCl_3$ )  $\delta$  8.29 (dd,  $J = 15.8, 8.3$  Hz, 2H), 8.20 – 8.15 (m, 1H), 8.01 – 7.92

(m, 3H), 7.82 (ddd,  $J = 8.4, 6.8, 1.5$  Hz, 1H), 7.78 – 7.72 (m, 2H), 7.64 (dd,  $J = 8.2, 7.1$  Hz, 2H), 7.57 – 7.49 (m, 2H).  $^{13}\text{C}$  NMR (101 MHz,  $\text{CDCl}_3$ )  $\delta$  159.5, 148.1, 138.7, 136.3, 134.0, 131.3, 129.8, 129.7, 129.2, 128.4, 127.8, 127.6, 127.0, 126.6, 126.0, 125.7, 125.4, 123.3, 116.0. HRMS (ESI) Calcd for  $\text{C}_{19}\text{H}_{13}\text{N}$  ( $[\text{M}+\text{H}]^+$ ): 256.1120; found: 256.1121.

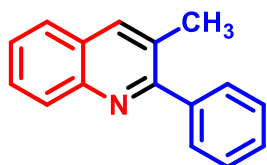

**3-Methyl-2-phenylquinoline (3r)**<sup>10</sup> Purified by column chromatography on silica gel using petroleum ether and ethyl acetate as eluents, 84 % (83 mg) yielded as white solid.  $^1\text{H}$  NMR (500 MHz,  $\text{CDCl}_3$ )  $\delta$  8.16 (d,  $J = 8.4$  Hz, 1H), 8.05 (s, 1H), 7.81 (dd,  $J = 8.2, 1.4$  Hz, 1H), 7.71 – 7.67 (m, 1H), 7.64 – 7.61 (m, 2H), 7.56 – 7.50 (m, 3H), 7.49 – 7.45 (m, 1H), 7.36 (s, 1H), 2.49 (s, 3H).  $^{13}\text{C}$  NMR (126 MHz,  $\text{CDCl}_3$ )  $\delta$  160.6, 146.6, 140.9, 136.8, 129.3, 128.9, 128.8, 128.3, 128.2, 127.6, 126.7, 126.4, 125.9, 20.6. HRMS (ESI) Calcd for  $\text{C}_{16}\text{H}_{13}\text{N}$  ( $[\text{M}+\text{H}]^+$ ): 220.1120; found: 220.1119.

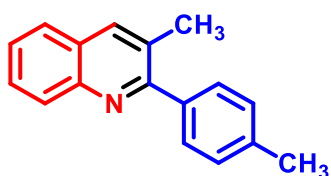

**2-(4-Methylphenyl)-3-methylquinoline (3s)**<sup>12</sup> Purified by column chromatography on silica gel using petroleum ether and ethyl acetate as eluents, 83 % (87 mg) yielded as yellow solid.  $^1\text{H}$  NMR (400 MHz,  $\text{CDCl}_3$ )  $\delta$  8.16 (dq,  $J = 8.5, 0.9$  Hz, 1H), 8.03 – 8.01 (m, 1H), 7.79 (dd,  $J = 8.1, 1.5$  Hz, 1H), 7.68 (ddd,  $J = 8.5, 6.9, 1.6$  Hz, 1H), 7.55 – 7.51 (m, 3H), 7.35 – 7.31 (m, 2H), 2.50 (s, 3H), 2.46 (s, 3H).  $^{13}\text{C}$  NMR (101 MHz,  $\text{CDCl}_3$ )  $\delta$  160.6, 146.7, 138.0, 136.7, 129.3, 129.0, 128.9, 128.8, 128.7, 127.6, 126.7, 126.3, 125.9, 21.4, 20.7. HRMS (ESI) Calcd for  $\text{C}_{17}\text{H}_{16}\text{N}$  ( $[\text{M}+\text{H}]^+$ ): 235.1355; found: 235.1356.

**2-(2-Pyridyl)quinoline (3t)**<sup>6</sup> Purified by column chromatography on silica gel using petroleum ether and ethyl acetate as eluents, 99 % (75 mg) yielded as colourless liquid.  $^1\text{H}$  NMR (400 MHz,  $\text{CDCl}_3$ )  $\delta$  8.77 (ddd,  $J = 4.8, 1.8, 0.9$  Hz, 1H), 8.68 (dt,  $J = 8.0, 1.1$  Hz, 1H), 8.59 (d,  $J = 8.6$  Hz, 1H), 8.31 (dd,  $J = 8.7, 1.0$  Hz, 1H), 8.21 (dq,  $J = 8.5, 0.9$  Hz, 1H), 7.92 – 7.86 (m, 2H), 7.76 (ddd,  $J = 8.6, 6.8, 1.5$  Hz, 1H), 7.57 (ddd,  $J = 8.1, 6.9, 1.1$  Hz, 1H), 7.38 (ddd,  $J = 7.5, 4.8, 1.2$  Hz, 1H).  $^{13}\text{C}$  NMR (101 MHz,  $\text{CDCl}_3$ )  $\delta$  156.4, 156.2, 149.2, 147.9, 136.9, 136.8, 129.8, 129.6, 128.3, 127.6, 126.8, 124.0, 121.9, 118.9. HRMS (ESI) Calcd for  $\text{C}_{14}\text{H}_{10}\text{N}_2$  ( $[\text{M}+\text{H}]^+$ ): 207.0916; found: 207.0916.

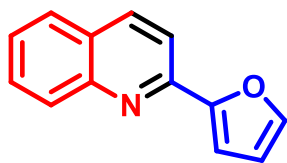

**2-(2-Furyl)quinoline (3u)**<sup>7</sup> Purified by column chromatography on silica gel using petroleum ether and ethyl acetate as eluents, 82 % (76 mg) yielded as brown solid. <sup>1</sup>H NMR (400 MHz, CDCl<sub>3</sub>) δ 8.20 – 8.14 (m, 2H), 7.86 – 7.79 (m, 2H), 7.75 – 7.71 (m, 1H), 7.66 (dd, *J* = 1.7, 0.8 Hz, 1H), 7.54 – 7.49 (m, 1H), 7.24 (s, 1H), 6.62 (dd, *J* = 3.4, 1.8 Hz, 1H). <sup>13</sup>C NMR (101 MHz, CDCl<sub>3</sub>) δ 153.7, 149.0, 148.1, 144.1, 136.7, 129.9, 129.4, 127.6, 127.2, 126.2, 117.5, 112.2, 110.1. HRMS (ESI) Calcd for C<sub>13</sub>H<sub>9</sub>NO ([M+H]<sup>+</sup>): 196.0756; found: 196.0756.

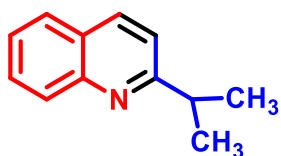

**2-isopropylquinoline (3v)**<sup>7</sup> Purified by column chromatography on silica gel using petroleum ether and ethyl acetate as eluents, 85 % (65 mg) yielded as yellow oil. <sup>1</sup>H NMR (400 MHz, CDCl<sub>3</sub>) δ 8.14 – 8.06 (m, 2H), 7.80 (dd, *J* = 8.0, 1.5 Hz, 1H), 7.71 (ddd, *J* = 8.4, 6.9, 1.5 Hz, 1H), 7.51 (ddd, *J* = 8.1, 6.8, 1.2 Hz, 1H), 7.37 (d, *J* = 8.4 Hz, 1H), 3.30 (h, *J* = 7.0 Hz, 1H), 1.43 (d, *J* = 7.0 Hz, 6H). <sup>13</sup>C NMR (101 MHz, CDCl<sub>3</sub>) δ 167.7, 147.7, 136.5, 129.3, 128.9, 127.5, 126.9, 125.7, 119.2, 37.3, 22.6. HRMS (ESI) Calcd for C<sub>12</sub>H<sub>13</sub>N ([M+H]<sup>+</sup>): 172.1120; found: 172.1121.

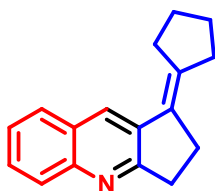

**1-cyclopentylidene-2,3-dihydro-1H-cyclopenta[b]quinoline (3w)** Purified by column chromatography on silica gel using petroleum ether and ethyl acetate as eluents, 68 % (72 mg) yielded a white solid. <sup>1</sup>H NMR (400 MHz, CDCl<sub>3</sub>) δ 8.05 (dt, *J* = 8.7, 0.9 Hz, 1H), 7.85 (q, *J* = 1.3 Hz, 1H), 7.69 (dd, *J* = 8.1, 1.4 Hz, 1H), 7.60 (ddd, *J* = 8.4, 6.8, 1.5 Hz, 1H), 7.42 (ddd, *J* = 8.0, 6.8, 1.3 Hz, 1H), 3.21 – 3.12 (m, 4H), 2.81 (ddt, *J* = 10.1, 5.1, 2.6 Hz, 2H), 2.45 (tt, *J* = 7.1, 2.0 Hz, 2H), 1.88 – 1.77 (m, 4H). <sup>13</sup>C NMR (101 MHz, CDCl<sub>3</sub>) δ 163.1, 148.4, 146.6, 138.4, 130.0, 129.8, 129.4, 127.9, 127.1, 126.8, 125.1, 33.9, 32.7, 28.8, 27.5, 27.3, 25.8. HRMS (ESI) Calcd for C<sub>17</sub>H<sub>17</sub>N ([M+H]<sup>+</sup>): 236.1436; found: 236.1436.

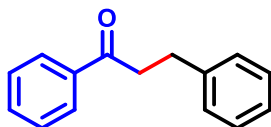

**1,3-diphenylpropan-1-one (5a)**<sup>13</sup> Purified by column chromatography on silica gel using petroleum ether and ethyl acetate as eluents, 96 % (100 mg) yielded as colorless liquid. <sup>1</sup>H NMR (500 MHz, CDCl<sub>3</sub>) δ 8.00 (d, *J* = 7.1 Hz, 2H), 7.59 (t, *J* = 7.3 Hz, 1H), 7.49 (t, *J* = 7.7 Hz, 2H), 7.35 – 7.24 (m, 5H), 3.37 – 3.31 (m, 2H), 3.12 (t, *J* = 7.7 Hz, 2H). <sup>13</sup>C NMR (126 MHz, CDCl<sub>3</sub>) δ 199.3, 141.3, 136.9, 133.1, 128.6, 128.6, 128.5, 128.1, 126.2, 40.5, 30.2. HRMS (ESI) Calcd for C<sub>15</sub>H<sub>14</sub>O ([M+H]<sup>+</sup>): 211.1117; found: 211.1116.

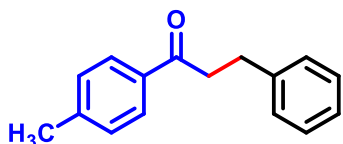

**3-phenyl-1-(p-tolyl)propan-1-one (5b)**<sup>14</sup> Purified by column chromatography on silica gel using petroleum ether and ethyl acetate as eluents, 97 % (108 mg) yielded a white solid. <sup>1</sup>H NMR (400 MHz, CDCl<sub>3</sub>) δ 7.86 (d, *J* = 8.3 Hz, 2H),

7.33 – 7.21 (m, 7H), 3.30 – 3.24 (m, 2H), 3.09 – 3.03 (m, 2H), 2.41 (s, 3H). <sup>13</sup>C NMR (101 MHz, CDCl<sub>3</sub>) δ 198.9, 143.8, 141.4, 134.4, 129.3, 128.5, 128.4, 128.2, 126.1, 40.4, 30.2, 21.6. HRMS (ESI) Calcd for C<sub>16</sub>H<sub>16</sub>O ([M+H]<sup>+</sup>): 225.1273; found: 225.1272.

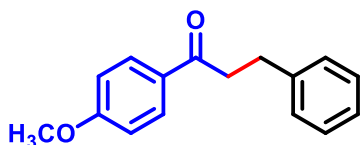

**1-(4-methoxyphenyl)-3-phenylpropan-1-one (5c)**<sup>13</sup>

Purified by column chromatography on silica gel using petroleum ether and ethyl acetate as eluents, 94 % (112 mg) yielded a yellow solid. <sup>1</sup>H NMR (500 MHz, CDCl<sub>3</sub>) δ 7.98

(d, *J* = 8.9 Hz, 2H), 7.35 – 7.22 (m, 5H), 6.95 (d, *J* = 8.9 Hz, 2H), 3.89 (s, 3H), 3.28 (dd, *J* = 8.7, 6.9 Hz, 2H), 3.09 (dd, *J* = 8.6, 6.9 Hz, 2H). <sup>13</sup>C NMR (126 MHz, CDCl<sub>3</sub>) δ 197.9, 163.5, 141.5, 130.3, 129.9, 128.5, 128.4, 126.1, 113.7, 55.5, 40.1, 30.3. HRMS (ESI) Calcd for C<sub>16</sub>H<sub>16</sub>O<sub>2</sub> ([M+H]<sup>+</sup>): 241.1223; found: 241.1122.

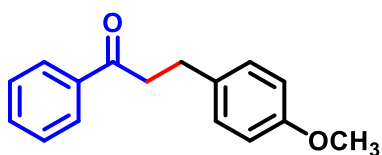

**3-(4-methoxyphenyl)-1-phenylpropan-1-one (5d)**<sup>15</sup>

Purified by column chromatography on silica gel using petroleum ether and ethyl acetate as eluents, 91 % (109 mg) yielded a white solid. <sup>1</sup>H NMR (400 MHz, CDCl<sub>3</sub>) δ 8.01 –

7.96 (m, 2H), 7.60 – 7.56 (m, 1H), 7.51 – 7.45 (m, 2H), 7.20 (d, *J* = 8.6 Hz, 2H), 6.89 – 6.85 (m, 2H), 3.82 (s, 3H), 3.32 – 3.28 (m, 2H), 3.04 (t, *J* = 7.6 Hz, 2H). <sup>13</sup>C NMR (101 MHz, CDCl<sub>3</sub>) δ 199.4, 158.0, 136.9, 133.3, 133.1, 129.4, 128.6, 128.1, 113.9, 55.3, 40.7, 29.3. HRMS (ESI) Calcd for C<sub>16</sub>H<sub>16</sub>O<sub>2</sub> ([M+H]<sup>+</sup>): 241.1225; found: 241.1225.

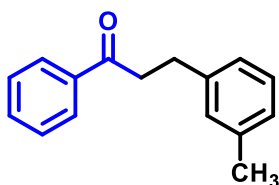

**1-phenyl-3-(m-tolyl)propan-1-one (5e)**<sup>16</sup> Purified by column

chromatography on silica gel using petroleum ether and ethyl acetate as eluents, 93 % (104 mg) yielded a white solid. <sup>1</sup>H NMR

(400 MHz, CDCl<sub>3</sub>) δ 8.03 – 7.97 (m, 2H), 7.61 – 7.57 (m, 1H), 7.51 – 7.46 (m, 2H), 7.23 (t, *J* = 7.5 Hz, 1H), 7.15 – 7.03 (m, 3H), 3.33 (dd, *J* = 8.7, 6.9 Hz, 2H), 3.07 (dd, *J* = 8.6, 6.9 Hz, 2H), 2.37 (s, 3H). <sup>13</sup>C NMR (101 MHz, CDCl<sub>3</sub>) δ 199.3, 141.3, 138.1, 136.9, 133.1, 129.3, 128.6, 128.5, 128.1, 126.9, 125.4, 40.6, 30.1, 21.4. HRMS (ESI) Calcd for C<sub>16</sub>H<sub>16</sub>O ([M+H]<sup>+</sup>): 225.1281; found: 225.1281.

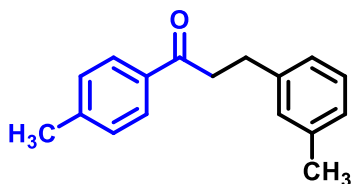

**3-(m-tolyl)-1-(p-tolyl)propan-1-one (5f)**<sup>17</sup> Purified by column chromatography on silica gel using petroleum ether and ethyl acetate as eluents, 98 % (117 mg) yielded a white solid. <sup>1</sup>H NMR (400 MHz, CDCl<sub>3</sub>) δ 7.92 – 7.87 (m, 2H), 7.27 (p, *J* = 1.6 Hz, 2H), 7.22 (t, *J* = 7.5 Hz, 1H), 7.12 – 7.03 (m, 3H), 3.29 (dd, *J* = 8.9, 6.7 Hz, 2H), 3.07 – 3.02 (m, 2H), 2.43 (s, 3H), 2.36 (s, 3H). <sup>13</sup>C NMR (101 MHz, CDCl<sub>3</sub>) δ 199.0, 143.8, 141.4, 138.1, 134.4, 129.3, 129.2, 128.4, 128.2, 126.9, 125.4, 40.5, 30.2, 21.6, 21.4. HRMS (ESI) Calcd for C<sub>17</sub>H<sub>18</sub>O ([M+H]<sup>+</sup>): 239.1441; found: 239.1141.

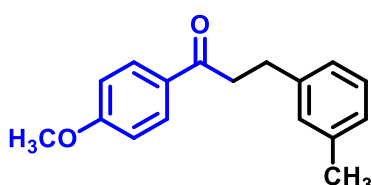

**1-(4-methoxyphenyl)-3-(m-tolyl)propan-1-one (5g)**<sup>18</sup> Purified by column chromatography on silica gel using petroleum ether and ethyl acetate as eluents, 96 % (122 mg) yielded a yellowish oil. <sup>1</sup>H NMR (400 MHz, CDCl<sub>3</sub>) δ 8.01 – 7.95 (m, 2H), 7.22 (t, *J* = 7.5 Hz, 1H), 7.16 – 7.01 (m, 3H), 6.97 – 6.93 (m, 2H), 3.89 (s, 3H), 3.31 – 3.22 (m, 2H), 3.09 – 3.00 (m, 2H), 2.36 (s, 3H). <sup>13</sup>C NMR (101 MHz, CDCl<sub>3</sub>) δ 197.9, 163.4, 141.4, 138.1, 130.3, 129.9, 129.3, 128.4, 126.8, 125.4, 113.7, 55.5, 40.2, 30.3, 21.4. HRMS (ESI) Calcd for C<sub>16</sub>H<sub>16</sub>O<sub>2</sub> ([M+H]<sup>+</sup>): 241.1223; found: 239.1222.

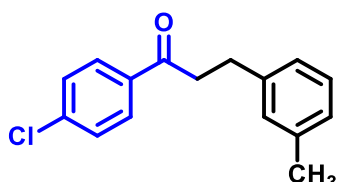

**3-(m-tolyl)-1-(p-tolyl)propan-1-one (5h)**<sup>17</sup> Purified by column chromatography on silica gel using petroleum ether and ethyl acetate as eluents, 89 % (115 mg) yielded a pale orange solid. <sup>1</sup>H NMR (400 MHz, CDCl<sub>3</sub>) δ 7.94 – 7.90 (m, 2H), 7.45 (d, *J* = 8.6 Hz, 2H), 7.21 (d, *J* = 7.4 Hz, 1H), 7.07 (dd, *J* = 10.8, 4.8 Hz, 3H), 3.31 – 3.26 (m, 2H), 3.05 (d, *J* = 8.1 Hz, 2H), 2.36 (s, 3H). <sup>13</sup>C NMR (101 MHz, CDCl<sub>3</sub>) δ 198.1, 141.0, 139.5, 138.2, 135.2, 129.5, 129.2, 128.9, 128.5, 126.9, 125.4, 40.5, 29.9, 21.4. HRMS (ESI) Calcd for C<sub>16</sub>H<sub>15</sub>OCl ([M+H]<sup>+</sup>): 259.0885; found: 259.0885.

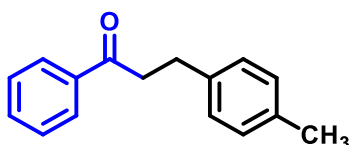

**1-phenyl-3-(p-tolyl)propan-1-one (5i)**<sup>13</sup> Purified by column chromatography on silica gel using petroleum ether and ethyl acetate as eluents, 95 % (106 mg) yielded a white solid. <sup>1</sup>H NMR (400 MHz, CDCl<sub>3</sub>) δ 8.02 – 7.95 (m, 2H), 7.58 (tt, *J* = 6.8, 1.3 Hz, 1H), 7.50 – 7.45 (m, 2H), 7.15 (q, *J* = 8.1 Hz, 4H), 3.34 – 3.28 (m, 2H), 3.10 – 3.02 (m, 2H), 2.35 (s, 3H). <sup>13</sup>C NMR (101 MHz, CDCl<sub>3</sub>) δ 199.4, 138.2, 136.9,

135.6, 133.0, 129.2, 128.6, 128.3, 128.1, 40.6, 29.7, 21.0. HRMS (ESI) Calcd for C<sub>16</sub>H<sub>16</sub>O ([M+H]<sup>+</sup>): 225.1272; found: 225.1272.

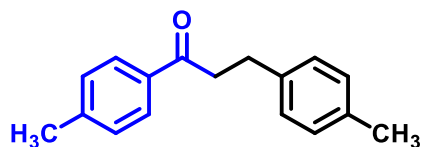

**1,3-di-p-tolylpropan-1-one (5j)**<sup>17</sup> Purified by column chromatography on silica gel using petroleum ether and ethyl acetate as eluents, 98 % (116 mg) yielded a yellow oil. <sup>1</sup>H NMR (400 MHz, CDCl<sub>3</sub>) δ 7.92 – 7.86

(m, 2H), 7.26 (t, *J* = 0.7 Hz, 2H), 7.15 (q, *J* = 8.1 Hz, 4H), 3.31 – 3.25 (m, 2H), 3.07 – 3.02 (m, 2H), 2.43 (s, 3H), 2.35 (s, 3H). <sup>13</sup>C NMR (101 MHz, CDCl<sub>3</sub>) δ 199.1, 143.8, 138.3, 135.6, 134.4, 129.3, 129.2, 128.3, 128.1, 40.5, 29.8, 21.6, 21.0. HRMS (ESI) Calcd for C<sub>17</sub>H<sub>18</sub>O ([M+H]<sup>+</sup>): 239.1437; found: 239.1437.

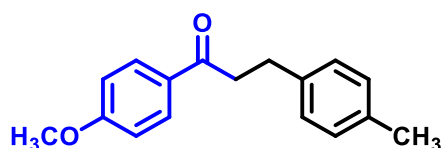

**1-(4-methoxyphenyl)-3-(p-tolyl)propan-1-one (5k)**<sup>18</sup> Purified by column chromatography on silica gel using petroleum ether and ethyl acetate as eluents, 95 % (120 mg) yielded a yellowish liquid. <sup>1</sup>H NMR

(500 MHz, CDCl<sub>3</sub>) δ 8.03 – 7.91 (m, 2H), 7.25 – 7.07 (m, 4H), 6.99 – 6.91 (m, 2H), 3.89 (s, 3H), 3.26 (t, *J* = 6.7 Hz, 2H), 3.05 (t, *J* = 6.8 Hz, 2H), 2.36 (s, 3H). <sup>13</sup>C NMR (126 MHz, CDCl<sub>3</sub>) δ 197.9, 163.4, 138.4, 135.6, 130.3, 130.0, 129.2, 128.3, 55.5, 40.3, 29.9, 21.0. HRMS (ESI) Calcd for C<sub>17</sub>H<sub>18</sub>O<sub>2</sub> ([M+H]<sup>+</sup>): 255.1379; found: 255.1379.

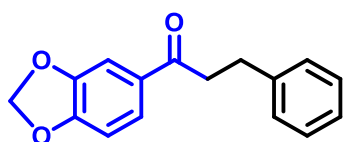

**1-(benzo[d][1,3]dioxol-5-yl)-3-phenylpropan-1-one (5l)**<sup>14</sup>

Purified by column chromatography on silica gel using petroleum ether and ethyl acetate as eluents, 94 % (119 mg) yielded a white solid. <sup>1</sup>H NMR (400 MHz, CDCl<sub>3</sub>) δ 7.55 (dd, *J* = 8.2, 1.7 Hz, 1H), 7.44 (d, *J* = 1.8 Hz, 1H), 7.30 (s, 1H), 7.27 – 7.21 (m, 3H), 6.83 (d, *J* = 8.2 Hz, 1H), 6.04 (s, 2H), 3.22 (t, *J* = 7.8 Hz, 2H), 3.08 – 3.01 (m, 2H). <sup>13</sup>C NMR (101 MHz, CDCl<sub>3</sub>) δ 197.3, 148.2, 141.3, 131.7, 129.0, 128.5, 128.4, 126.1, 124.3, 107.9, 107.9, 101.8, 40.2, 30.4. HRMS (ESI) Calcd for C<sub>16</sub>H<sub>14</sub>O<sub>3</sub> ([M+H]<sup>+</sup>): 255.1021; found: 255.1020.

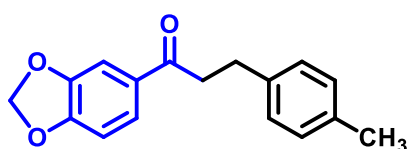

**1-(benzo[d][1,3]dioxol-5-yl)-3-(p-tolyl)propan-1-one (5m)**

Purified by column chromatography on silica gel using petroleum ether and ethyl acetate as eluents, 96 % (128 mg) yielded a white solid. <sup>1</sup>H NMR (400 MHz, CDCl<sub>3</sub>) δ 7.58 (dd, *J* = 8.2, 1.7 Hz, 1H), 7.47 (d, *J* = 1.7 Hz, 1H), 7.18 – 7.12 (m, 4H), 6.86 (d, *J* = 8.1 Hz, 1H), 6.06 (s, 2H), 3.25 – 3.20 (m, 2H), 3.06 – 3.01 (m, 2H), 2.35 (s, 3H). <sup>13</sup>C NMR (101 MHz, CDCl<sub>3</sub>) δ 197.4, 151.7, 148.2, 138.2, 135.6, 131.8, 129.2, 128.3, 124.3, 107.9,



107.9, 101.8, 40.4, 29.9, 21.0. HRMS (ESI) Calcd for C<sub>17</sub>H<sub>16</sub>O<sub>3</sub> ([M+H]<sup>+</sup>): 269.1172; found: 269.1172.

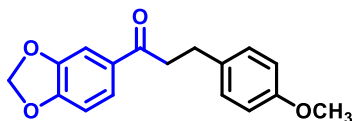

**1-(benzo[d][1,3]dioxol-5-yl)-3-(4-methoxyphenyl)propan-1-one (5n)** Purified by column chromatography on silica gel using petroleum ether and ethyl acetate as eluents, 95 % (135 mg) yielded a white solid. <sup>1</sup>H NMR (400 MHz, CDCl<sub>3</sub>) δ 7.57 (dd, *J* = 8.2, 1.7 Hz, 1H), 7.46 (d, *J* = 1.7 Hz, 1H), 7.18 (d, *J* = 8.6 Hz, 2H), 6.86 (dd, *J* = 8.5, 2.8 Hz, 3H), 6.06 (s, 2H), 3.81 (s, 3H), 3.24 – 3.18 (m, 2H), 3.04 – 2.97 (m, 2H). <sup>13</sup>C NMR (101 MHz, CDCl<sub>3</sub>) δ 197.5, 157.9, 151.7, 148.2, 133.4, 131.8, 129.3, 124.3, 113.9, 107.9, 107.9, 101.8, 55.3, 40.5, 29.5. HRMS (ESI) Calcd for C<sub>17</sub>H<sub>16</sub>O<sub>4</sub> ([M+H]<sup>+</sup>): 285.1122; found: 285.1122.

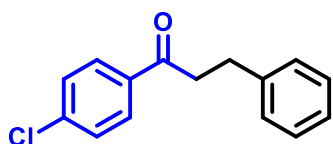

**1-(4-chlorophenyl)-3-phenylpropan-1-one (5o)**<sup>13</sup> Purified by column chromatography on silica gel using petroleum ether and ethyl acetate as eluents, 88 % (107 mg) yielded a colorless liquid. <sup>1</sup>H NMR (400 MHz, CDCl<sub>3</sub>) δ 7.95 – 7.88 (m, 2H), 7.47 – 7.42 (m, 2H), 7.35 – 7.30 (m, 2H), 7.28 – 7.23 (m, 3H), 3.33 – 3.27 (m, 2H), 3.11 – 3.06 (m, 2H). <sup>13</sup>C NMR (101 MHz, CDCl<sub>3</sub>) δ 198.0, 141.1, 139.5, 135.2, 129.5, 128.9, 128.6, 128.4, 126.2, 40.4, 30.1. HRMS (ESI) Calcd for C<sub>15</sub>H<sub>13</sub>OCl ([M+H]<sup>+</sup>): 245.2737; found: 245.0736.

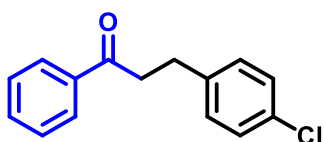

**3-(4-chlorophenyl)-1-phenylpropan-1-one (5p)**<sup>13</sup> Purified by column chromatography on silica gel using petroleum ether and ethyl acetate as eluents, 85 % (104 mg) yielded a colorless liquid. <sup>1</sup>H NMR (500 MHz, CDCl<sub>3</sub>) δ 7.98 (d, *J* = 7.5 Hz, 2H), 7.58 (d, *J* = 7.5 Hz, 1H), 7.49 (t, *J* = 7.6 Hz, 2H), 7.29 (d, *J* = 8.3 Hz, 2H), 7.22 (s, 2H), 3.31 (t, *J* = 7.5 Hz, 2H), 3.07 (t, *J* = 7.5 Hz, 2H). <sup>13</sup>C NMR (126 MHz, CDCl<sub>3</sub>) δ 198.9, 139.8, 136.7, 133.2, 131.9, 129.9, 128.7, 128.6, 128.0, 77.3, 77.0, 76.8, 40.2, 29.4. HRMS (ESI) Calcd for C<sub>15</sub>H<sub>13</sub>OCl ([M+H]<sup>+</sup>): 245.2737; found: 245.0736.





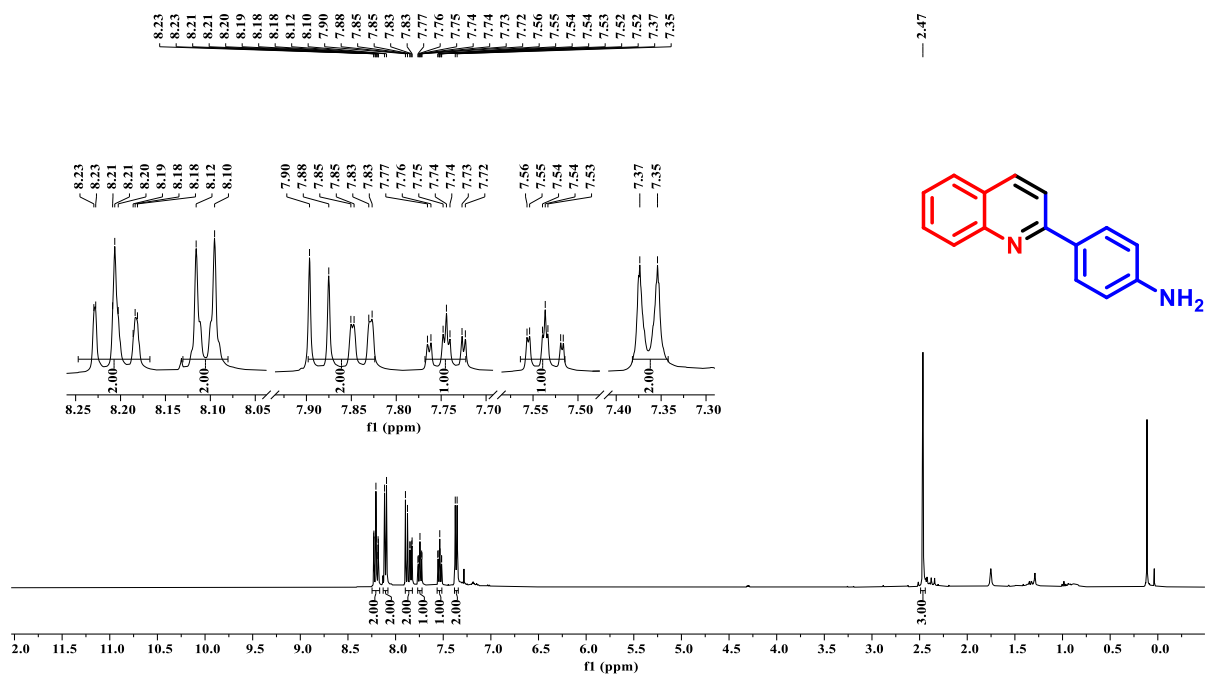

Fig. S20 <sup>1</sup>H NMR spectrum of 3b in CDCl<sub>3</sub> (400 MHz).

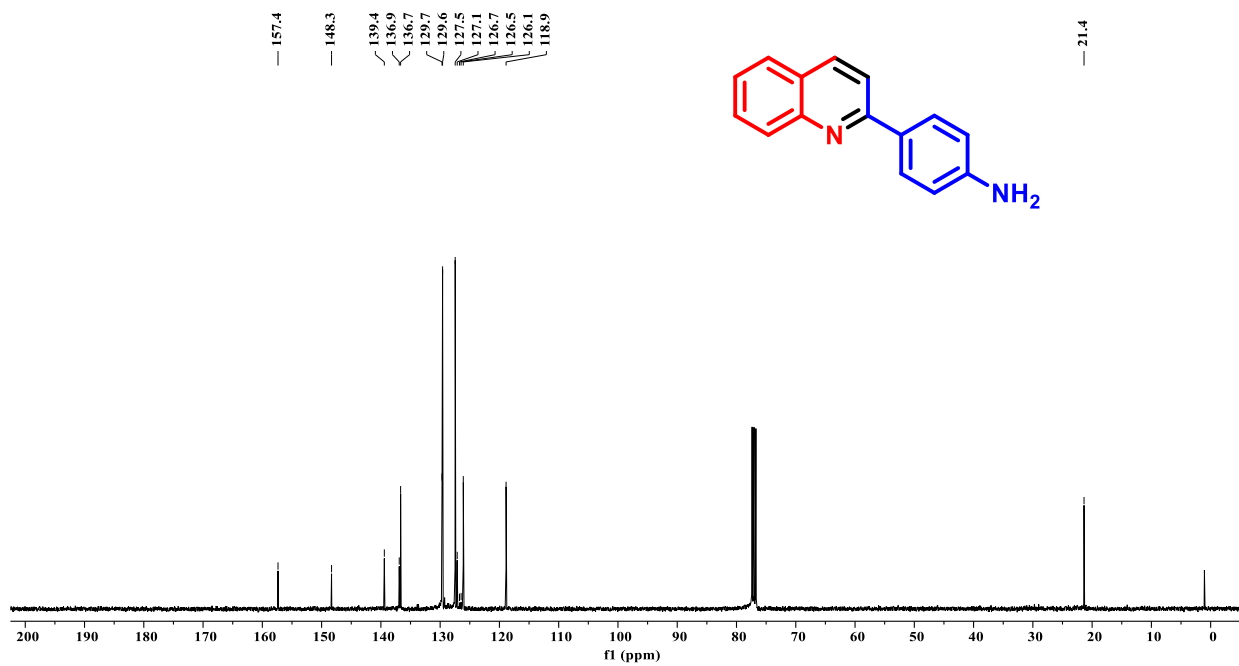

Fig. S21 <sup>13</sup>C {<sup>1</sup>H} NMR spectrum of 3b in CDCl<sub>3</sub> (101 MHz).

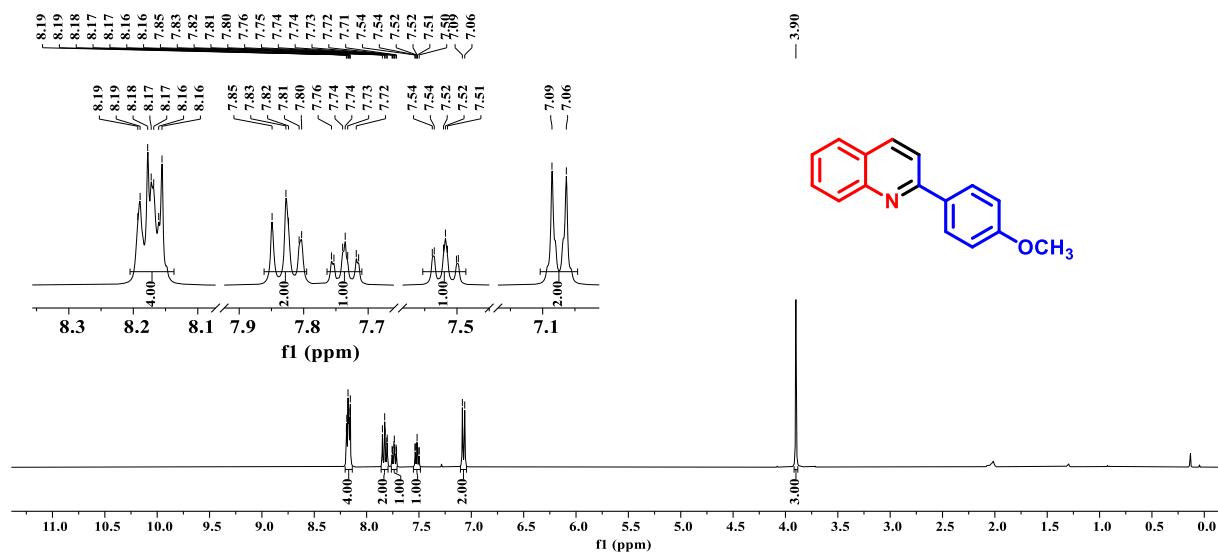

Fig. S22 <sup>1</sup>H NMR spectrum of **3c** in CDCl<sub>3</sub> (400 MHz).

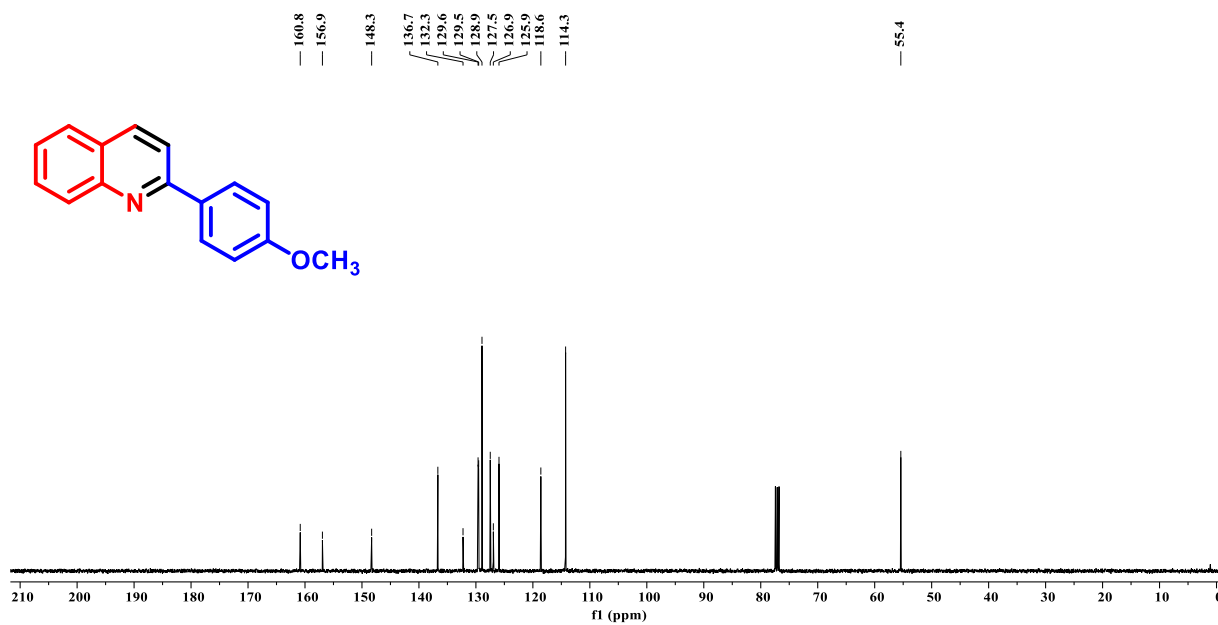

Fig. S23 <sup>13</sup>C {<sup>1</sup>H} NMR spectrum of **3c** in CDCl<sub>3</sub> (101 MHz).

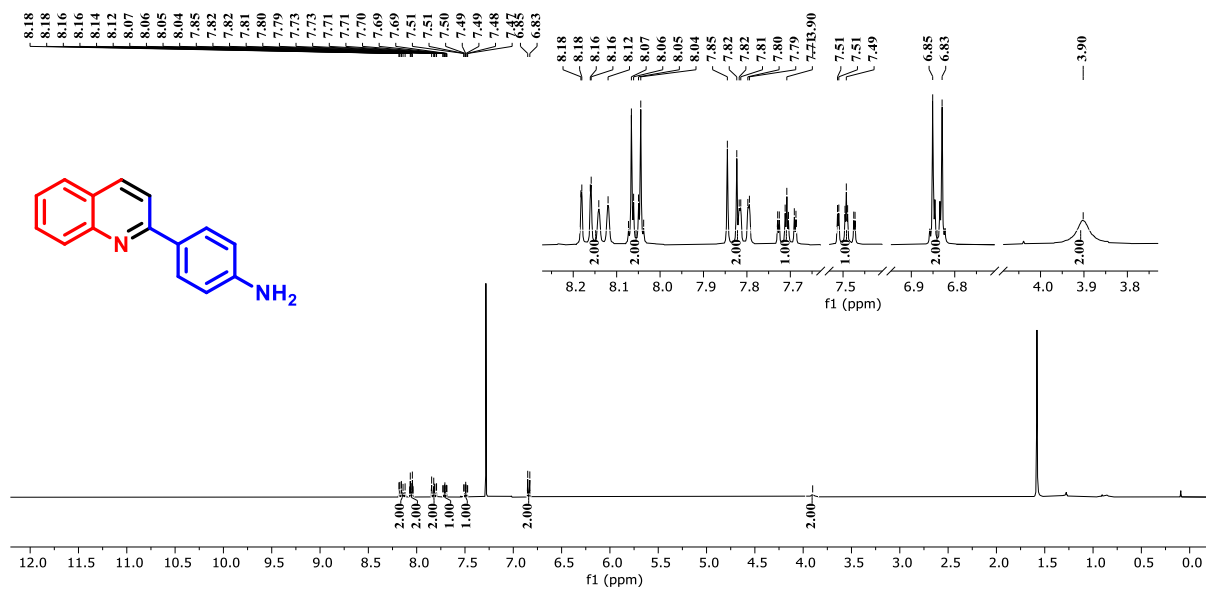

**Fig. S24** <sup>1</sup>H NMR spectrum of **3d** in CDCl<sub>3</sub> (400 MHz).

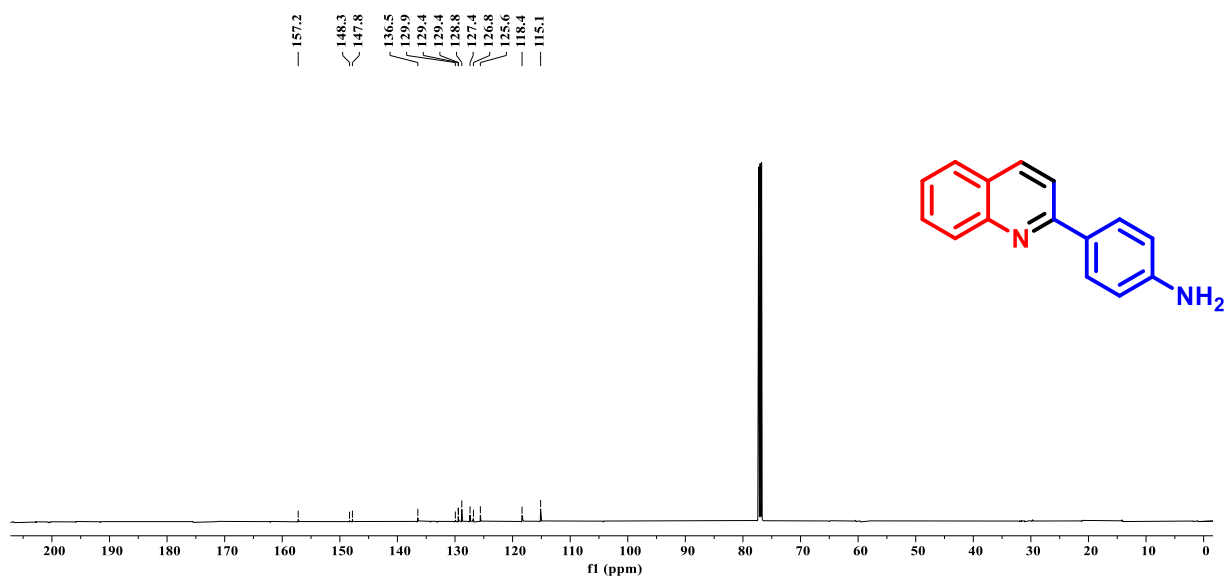

**Fig. S25** <sup>13</sup>C {<sup>1</sup>H} NMR spectrum of **3d** in CDCl<sub>3</sub> (126 MHz).



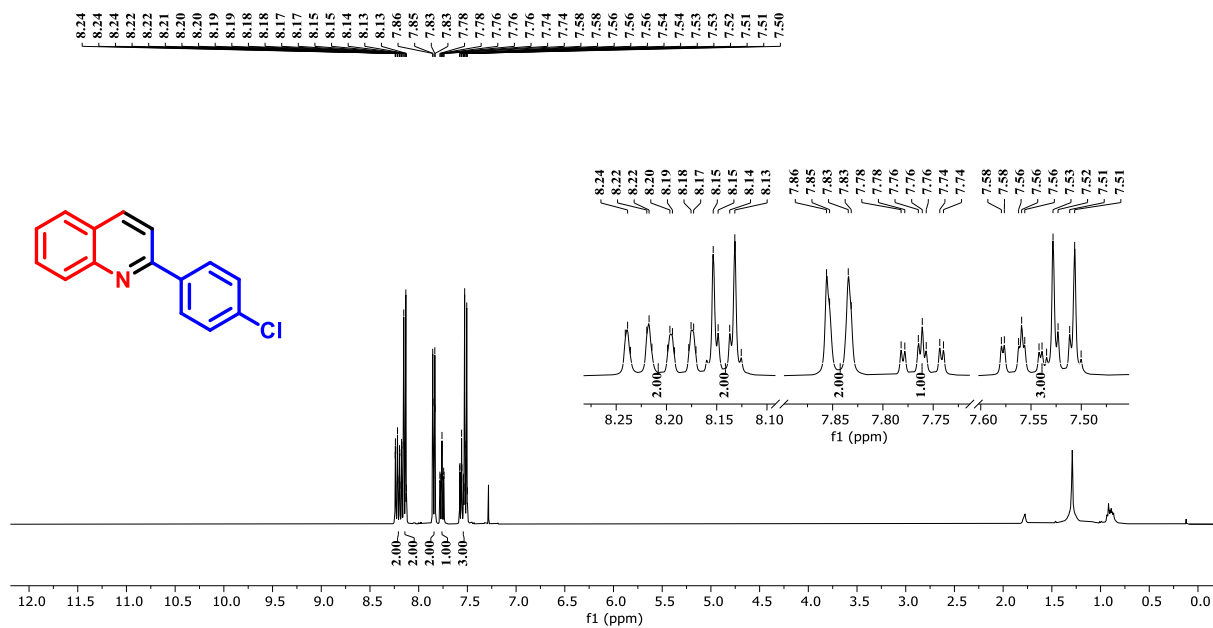

**Fig. S29**  $^1\text{H}$  NMR spectrum of **3f** in  $\text{CDCl}_3$  (400 MHz).

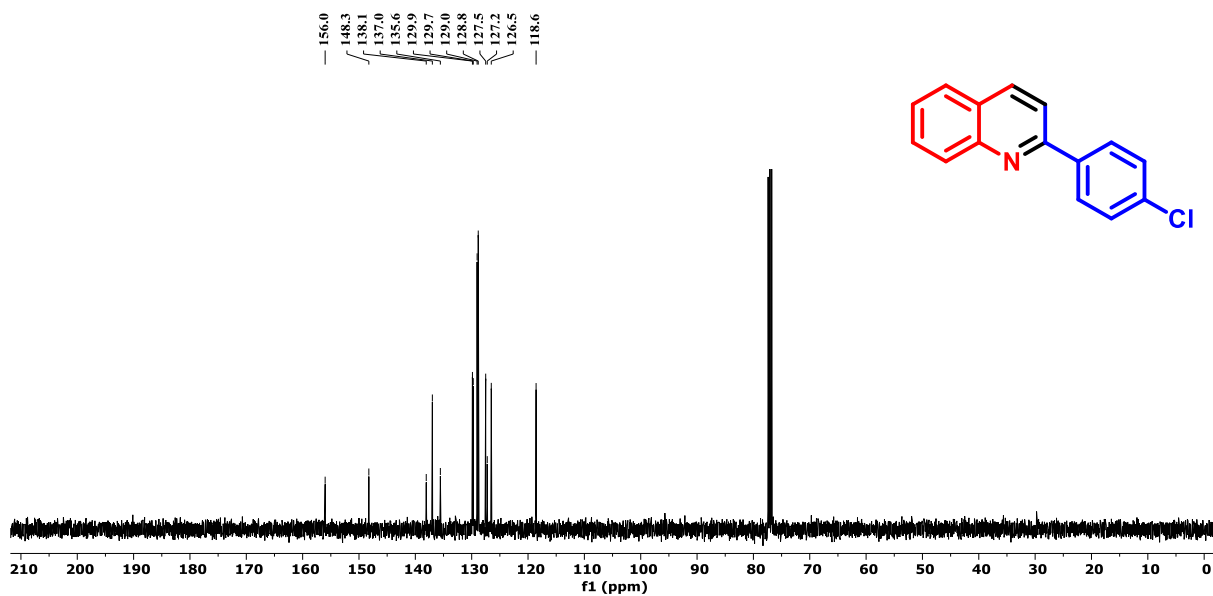

**Fig. S30**  $^{13}\text{C}$   $\{^1\text{H}\}$  NMR spectrum of **3f** in  $\text{CDCl}_3$  (101 MHz).

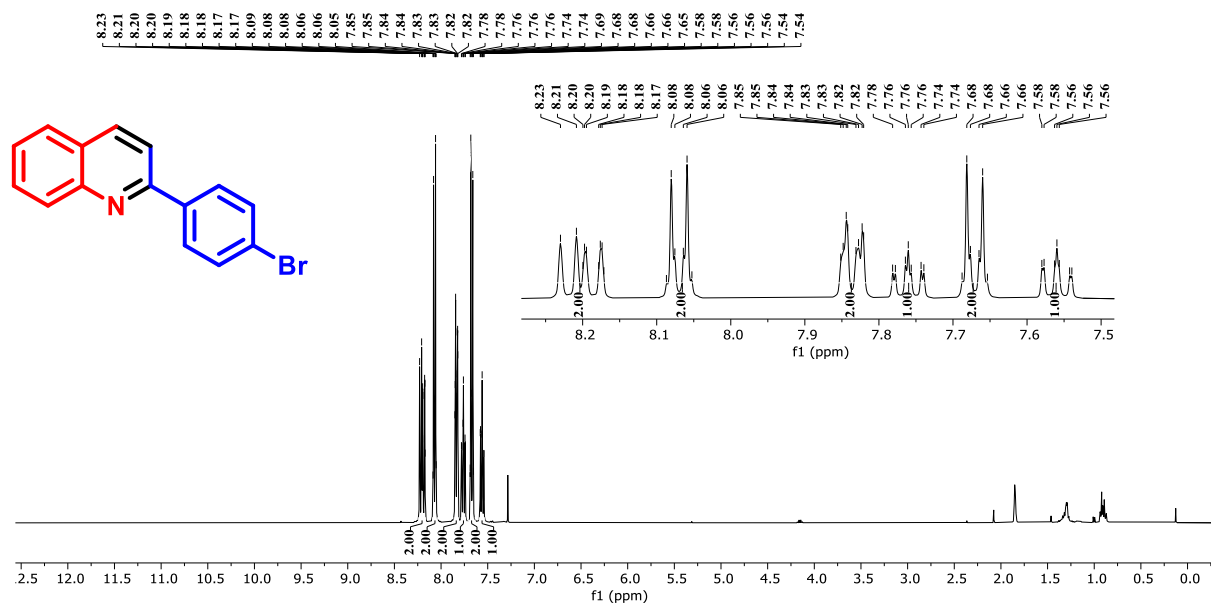

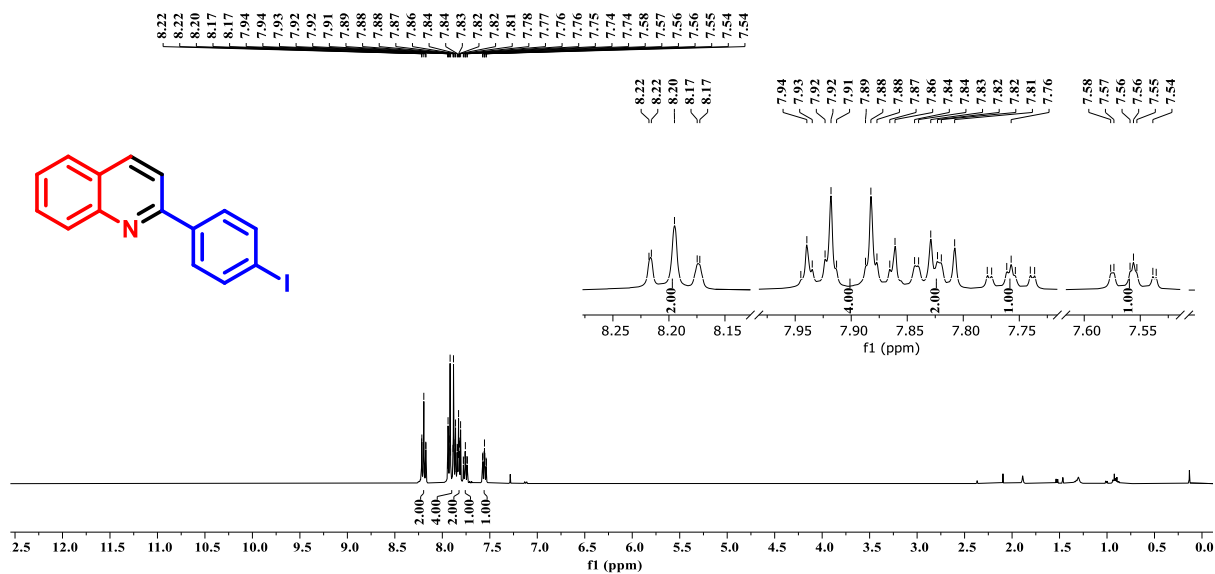

**Fig. S33**  $^1\text{H}$  NMR spectrum of **3h** in  $\text{CDCl}_3$  (400 MHz).

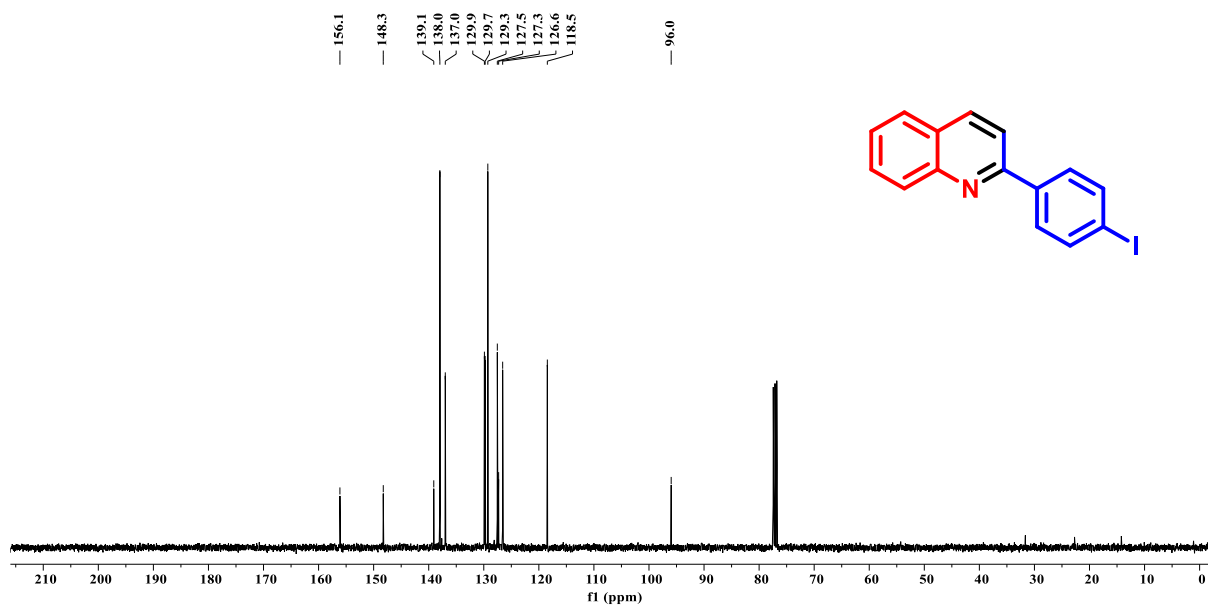

**Fig. S34**  $^{13}\text{C}$   $\{^1\text{H}\}$  NMR spectrum of **3h** in  $\text{CDCl}_3$  (101 MHz).



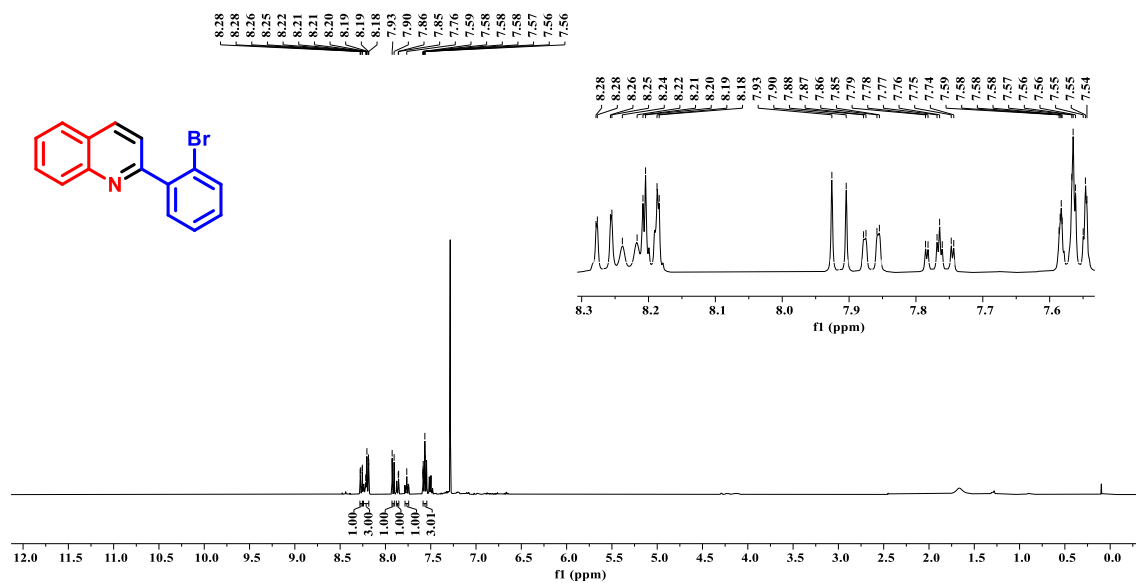

**Fig. S35**  $^1\text{H}$  NMR spectrum of **3i** in  $\text{CDCl}_3$  (400 MHz).

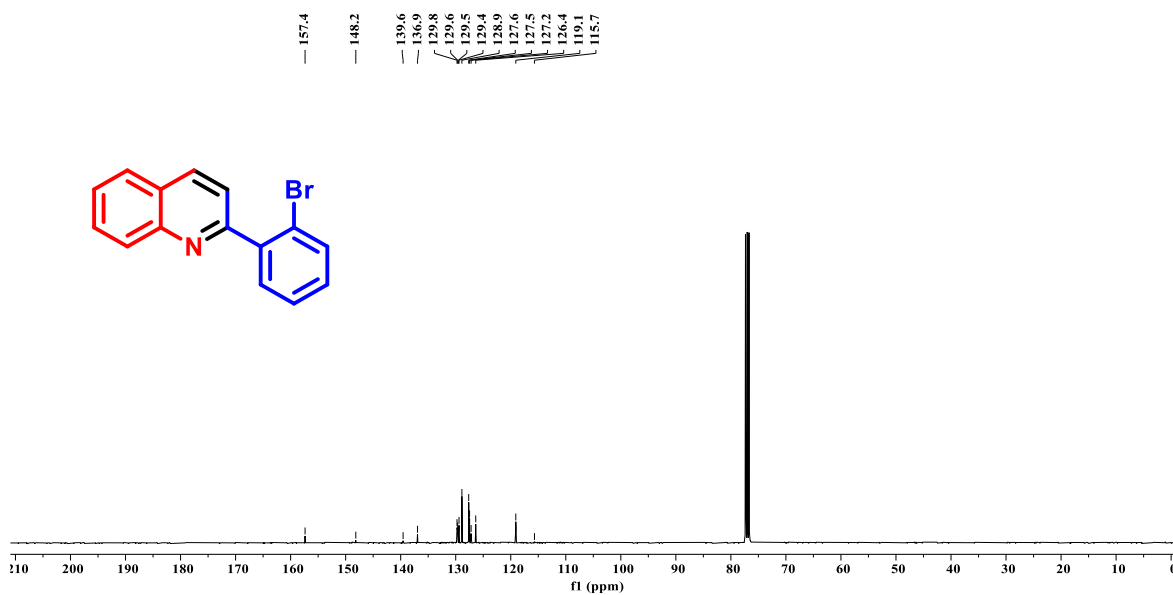

**Fig. S36**  $^{13}\text{C}\{^1\text{H}\}$  NMR spectrum of **3i** in  $\text{CDCl}_3$  (101 MHz).





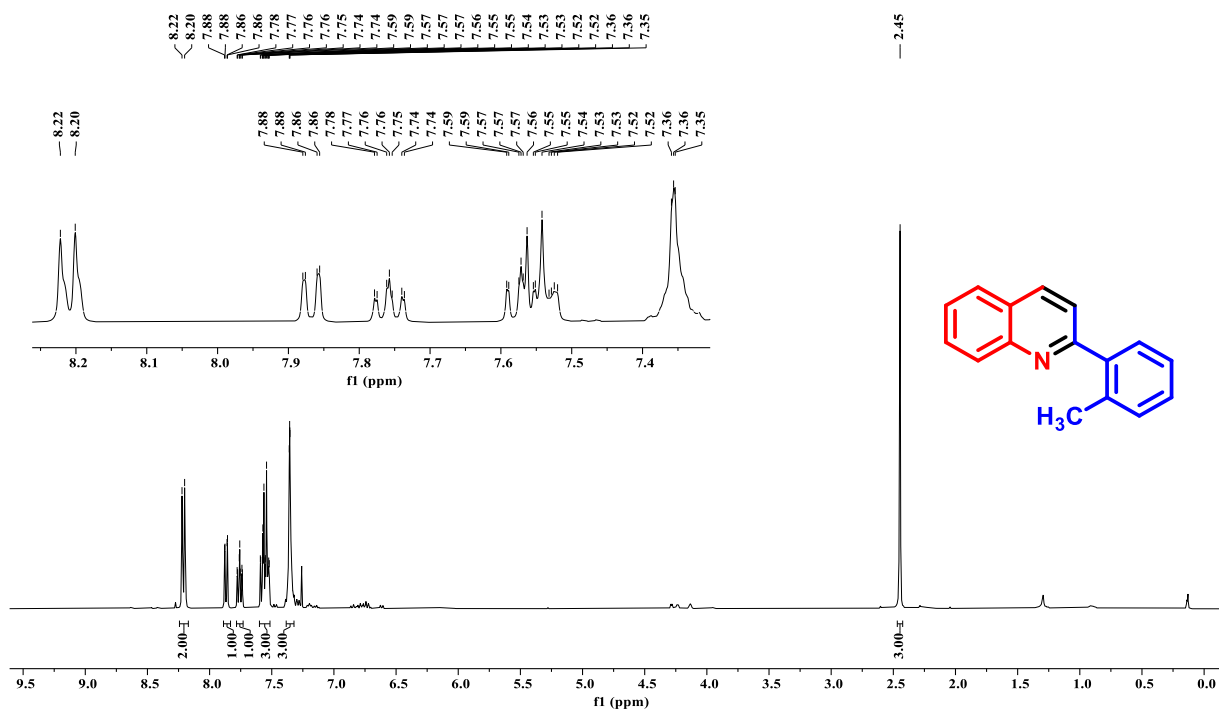

**Fig. S41** <sup>1</sup>H NMR spectrum of **3I** in CDCl<sub>3</sub> (400 MHz).

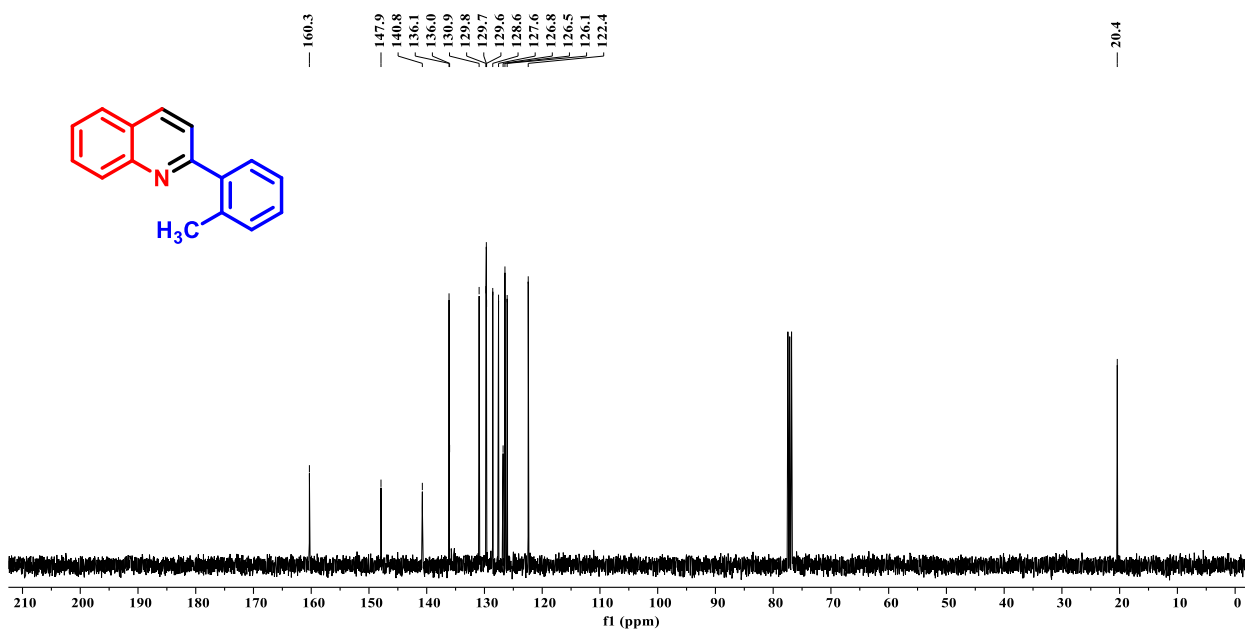

**Fig. S42** <sup>13</sup>C {<sup>1</sup>H} NMR spectrum of **3I** in CDCl<sub>3</sub> (101 MHz).

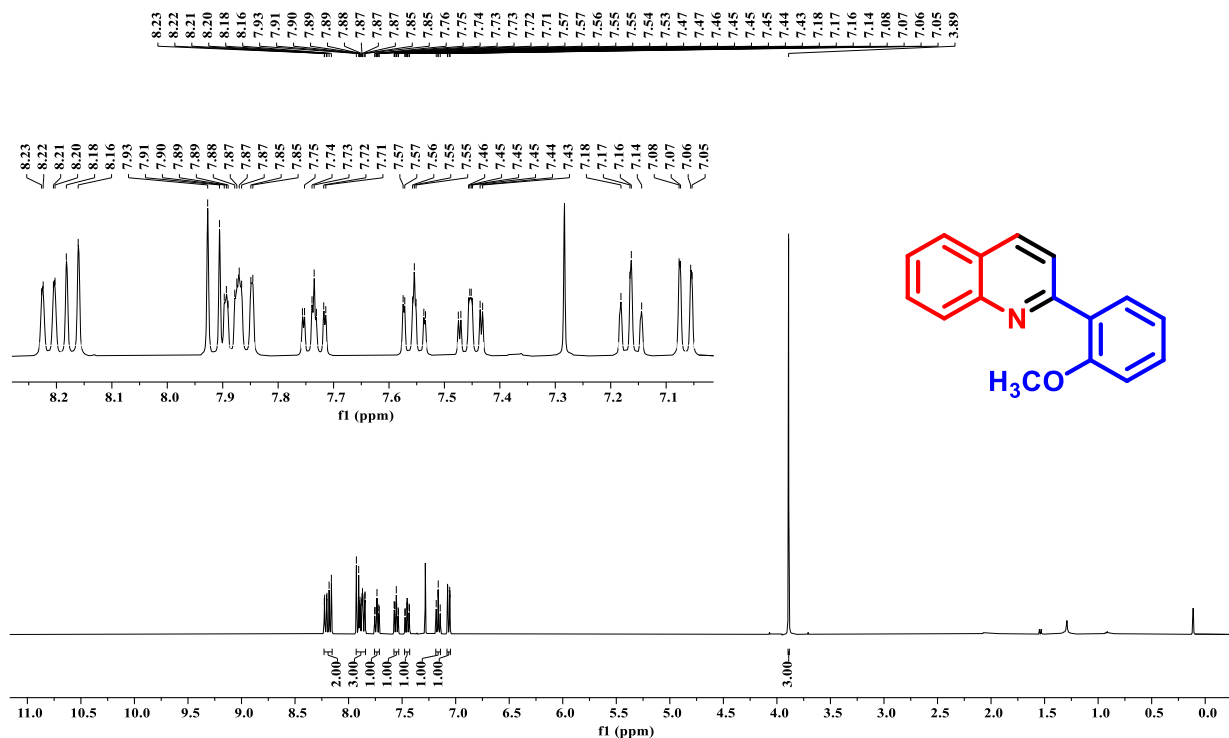

**Fig. S43**  $^1\text{H}$  NMR spectrum of **3m** in  $\text{CDCl}_3$  (400 MHz).

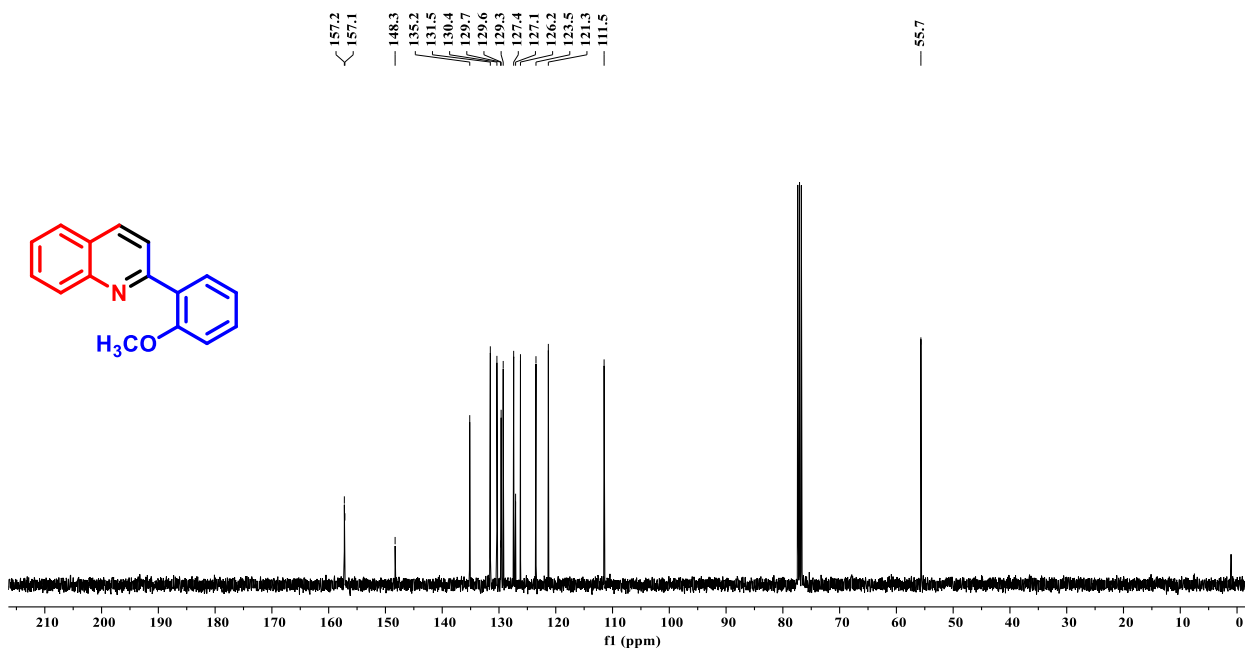

**Fig. S44**  $^{13}\text{C}\{^1\text{H}\}$  NMR spectrum of **3m** in  $\text{CDCl}_3$  (101 MHz).

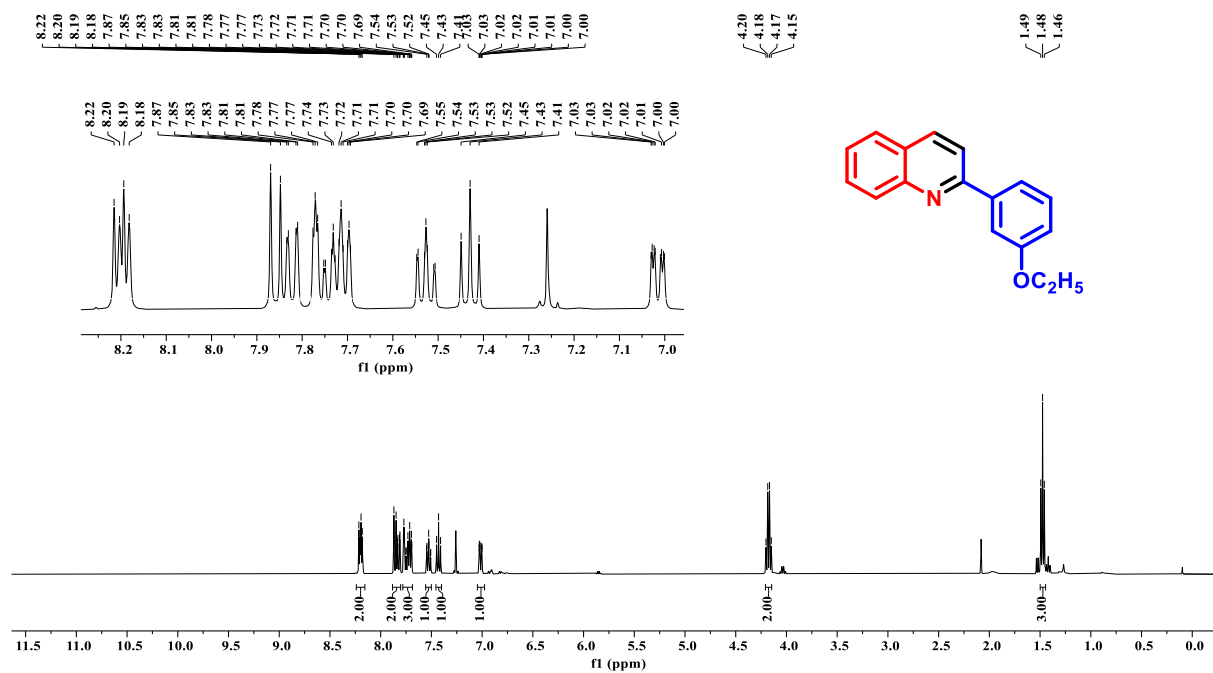

Fig. S45 <sup>1</sup>H NMR spectrum of **3n** in CDCl<sub>3</sub> (400 MHz).

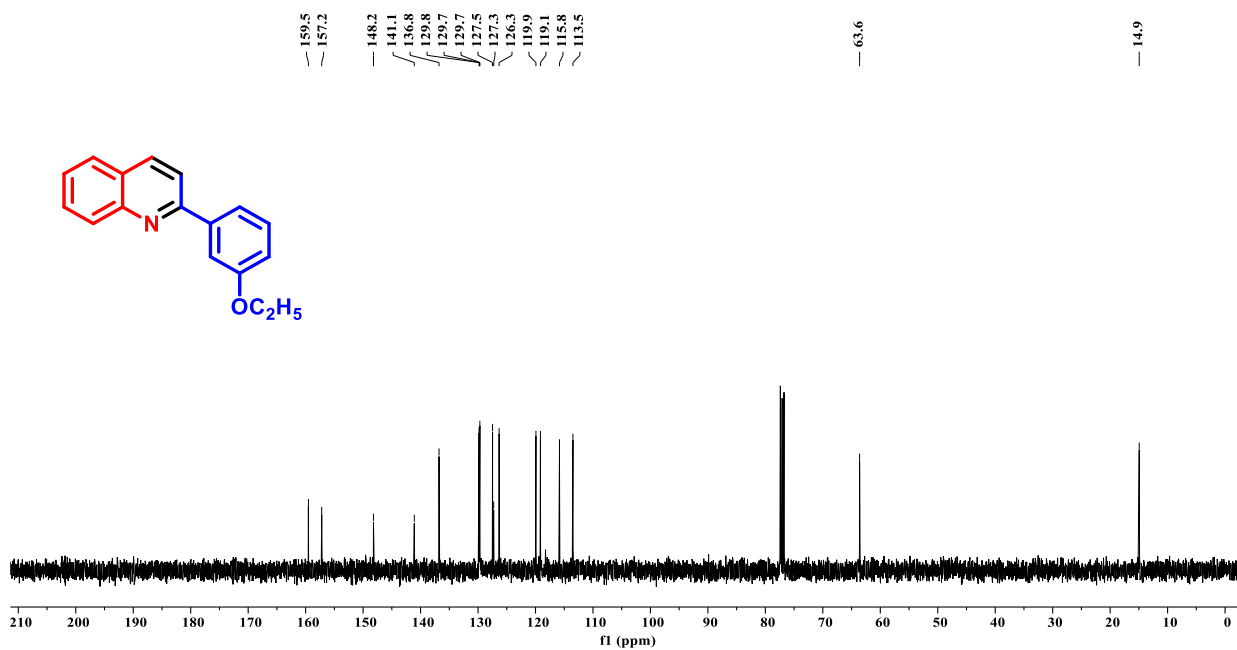

Fig. S46 <sup>13</sup>C {<sup>1</sup>H} NMR spectrum of **3n** in CDCl<sub>3</sub> (101 MHz).

**Sample Information**

|                       |                 |                           |                                                                        |
|-----------------------|-----------------|---------------------------|------------------------------------------------------------------------|
| <b>Name</b>           | MSB-AP-73-2     | <b>Data File Path</b>     | D:\Projects\MASS Data\Data\JULY-2024\MSB-AP-73-2.d                     |
| <b>Sample ID</b>      |                 | <b>Acq. Time (Local)</b>  | 25-07-2024 12:38:42 (UTC+05:30)                                        |
| <b>Instrument</b>     | LCMSQTOF-G6545B | <b>Method Path (Acq)</b>  | D:\Projects\MASS Data\Methods\A1B1_POS_100-600_4000_500_80_new.m       |
| <b>MS Type</b>        | QTOF            | <b>Version (Acq SW)</b>   | 6200 series TOF/6500 series Q-TOF (11.0.203.0)                         |
| <b>Inj. Vol. (ul)</b> | 0.5             | <b>IRM Status</b>         | Success                                                                |
| <b>Position</b>       | PIA1            | <b>Method Path (DA)</b>   | C:\Users\LCMS QTOF G6545\Desktop\Report Templates\REPORT METHOD\HRMS.m |
| <b>Plate Pos.</b>     |                 | <b>Target Source Path</b> |                                                                        |
| <b>Operator</b>       | SYSTEM (SYSTEM) | <b>Result Summary</b>     | 1 qualified (1 targets)                                                |

**Sample Spectra**

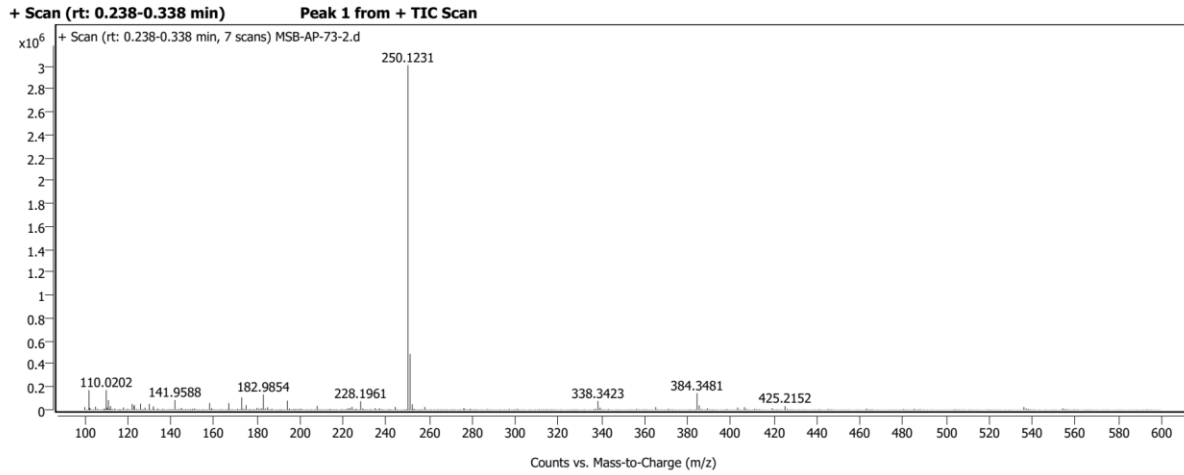

**Compound Details**

Cpd. 1: C17 H15 N O

| Formula     | m/z      | Observed M/Z     | Difference Da     | Difference PPM   | Score |
|-------------|----------|------------------|-------------------|------------------|-------|
| C17 H15 N O | 250.1231 | 250.123115199897 | 0.502393057701056 | 2.01670844148676 | 97.08 |

Compound Spectra (Zoomed)

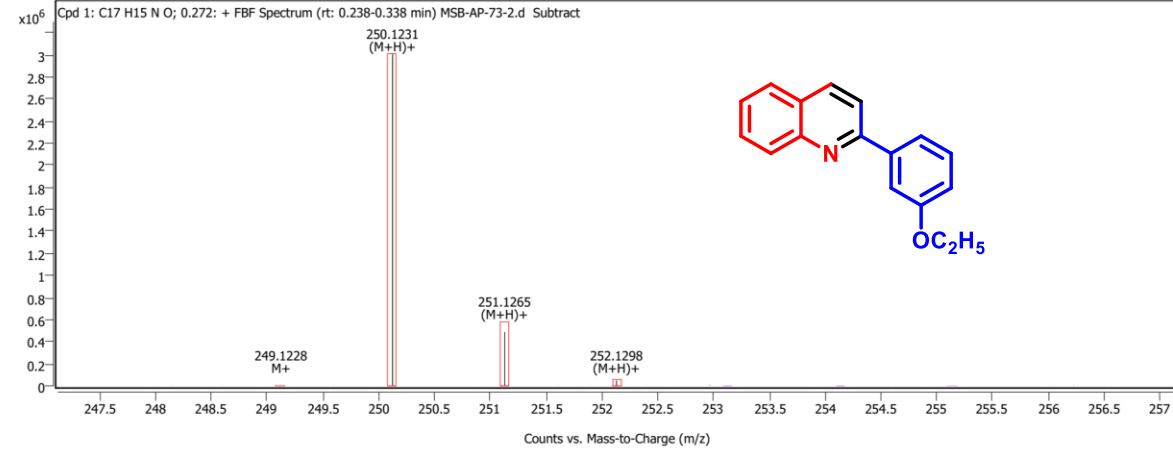

MassHunter Qual 10.0  
(End of Report)

Fig. S47 HRMS spectrum of 3n.

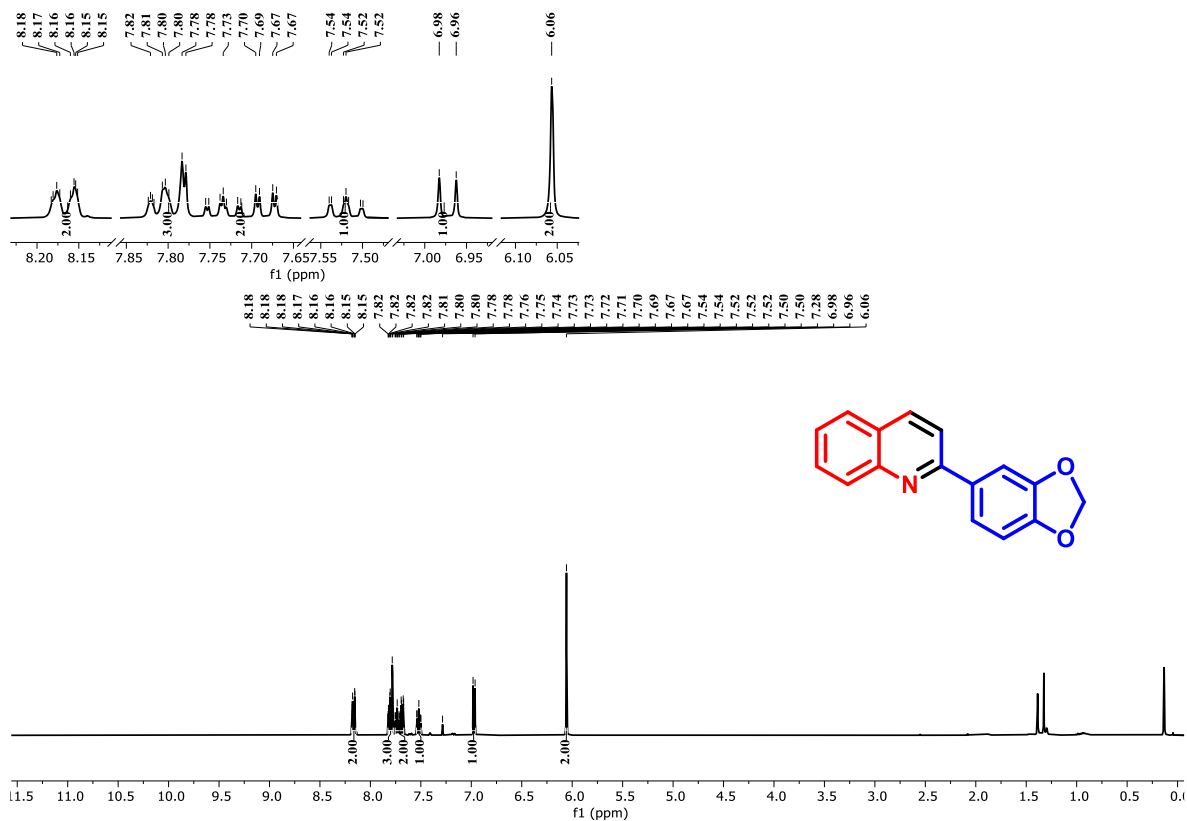

**Fig. S48** <sup>1</sup>H NMR spectrum of **3o** in CDCl<sub>3</sub> (400 MHz).

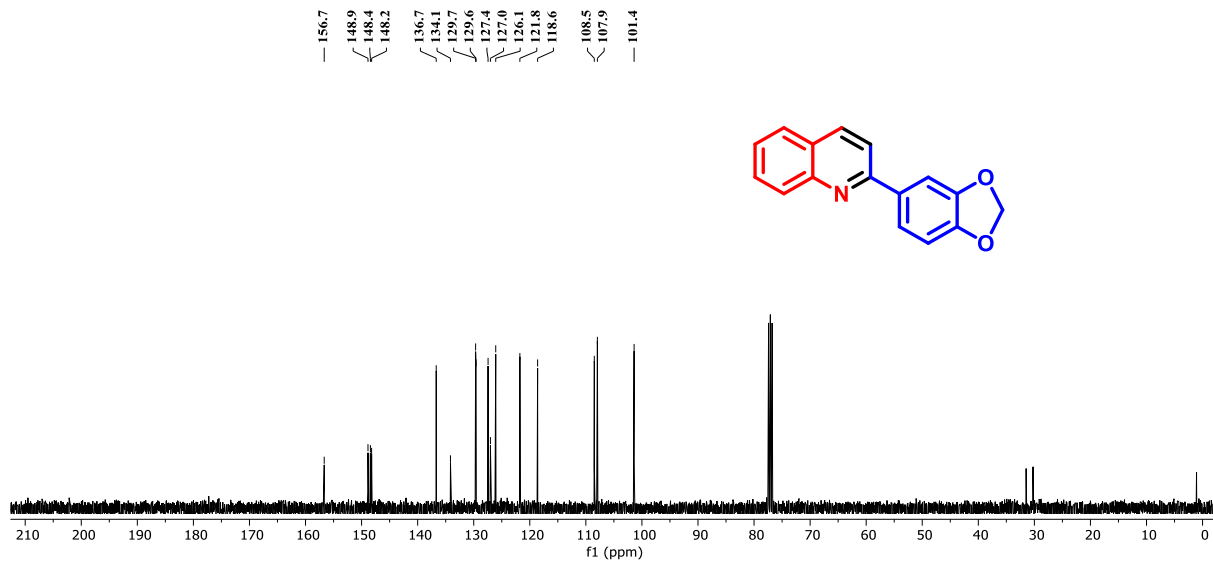

**Fig. S49** <sup>13</sup>C {<sup>1</sup>H} NMR spectrum of **3o** in CDCl<sub>3</sub> (101 MHz).



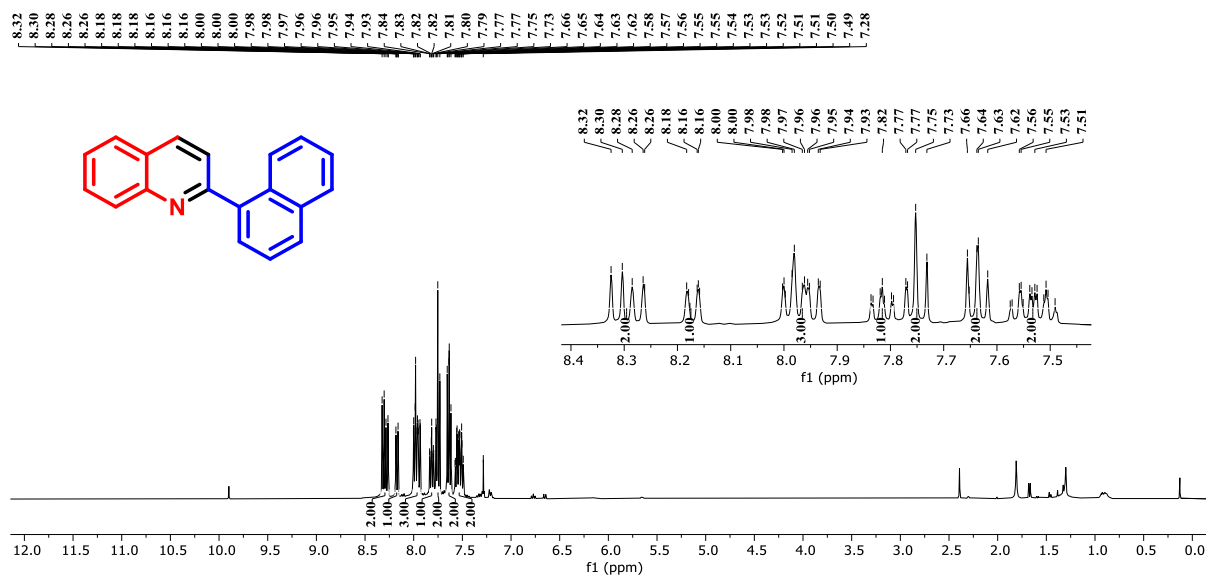

Fig. S50  $^1\text{H}$  NMR spectrum of **3p** in  $\text{CDCl}_3$  (400 MHz).

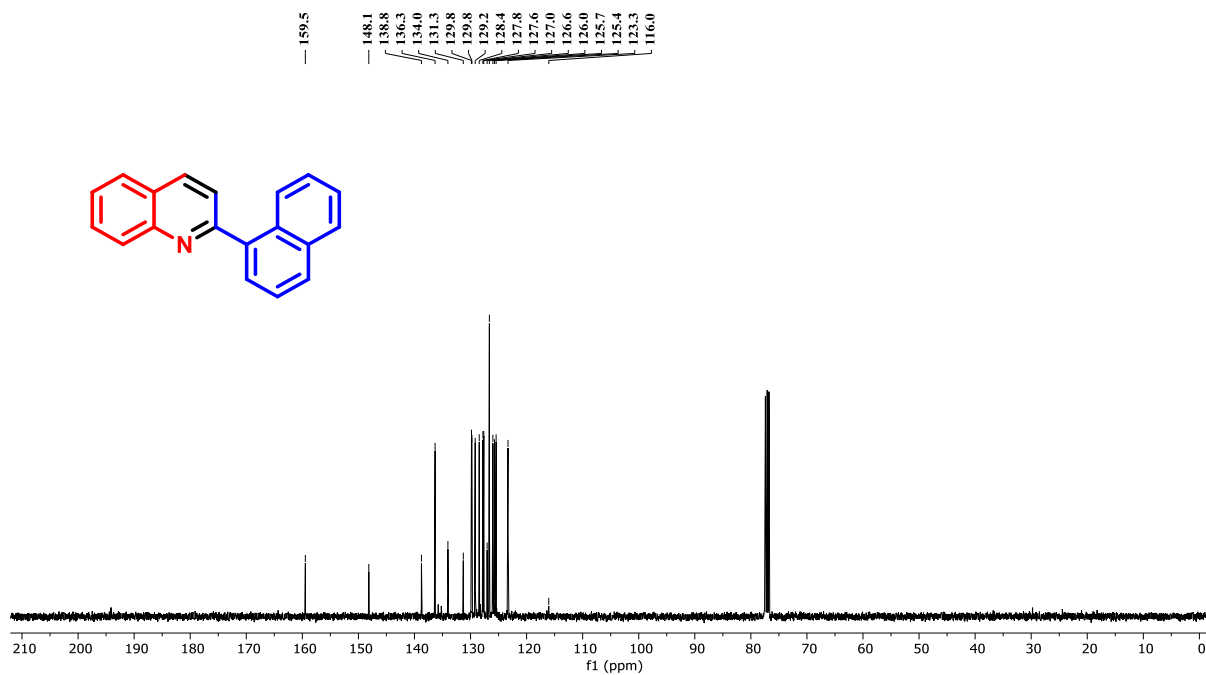

Fig. S51  $^{13}\text{C}\{^1\text{H}\}$  NMR spectrum of **3p** in  $\text{CDCl}_3$  (101 MHz).

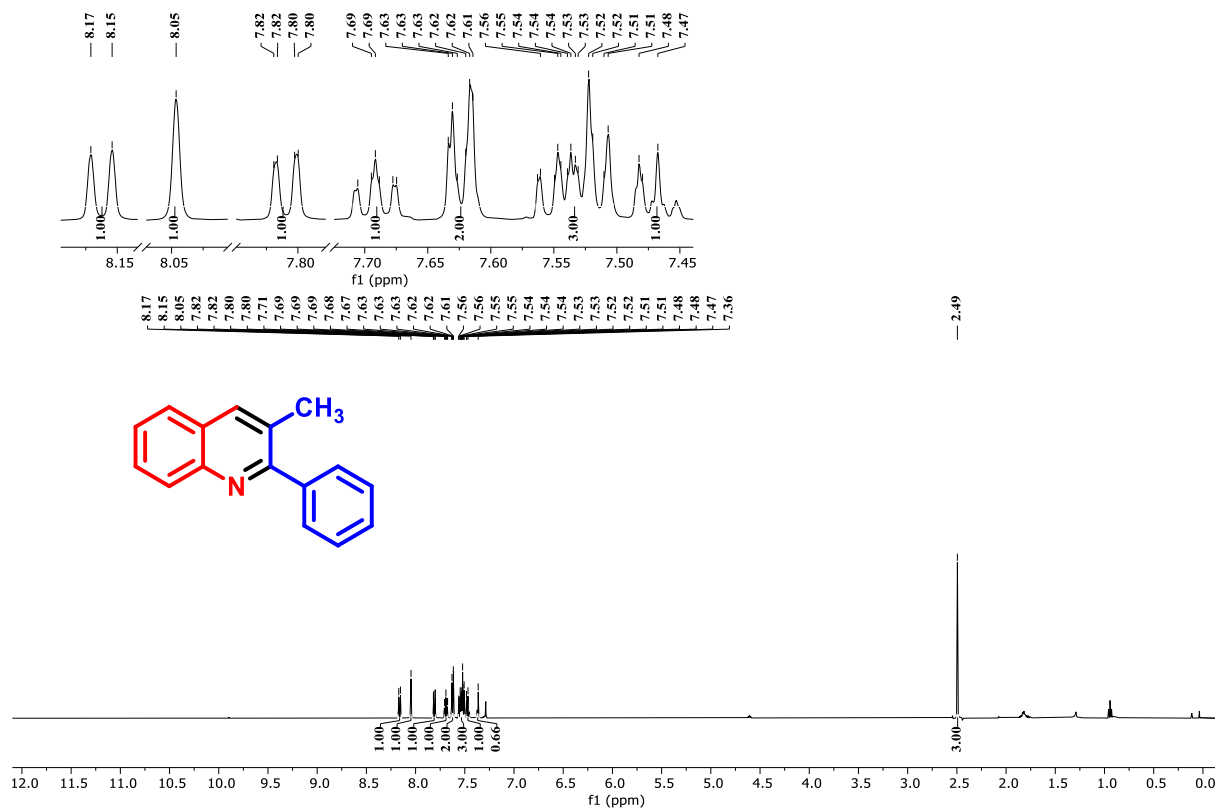

Fig. S52 <sup>1</sup>H NMR spectrum of 3r in CDCl<sub>3</sub> (500 MHz).

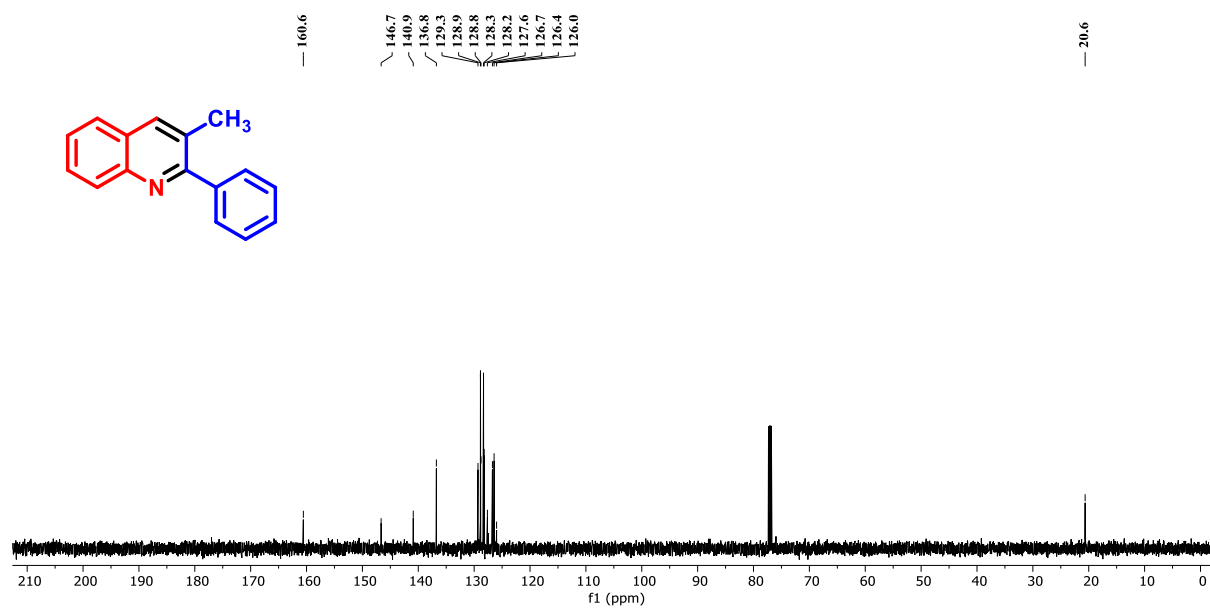

Fig. S53 <sup>13</sup>C {<sup>1</sup>H} NMR spectrum of 3r in CDCl<sub>3</sub> (126 MHz).

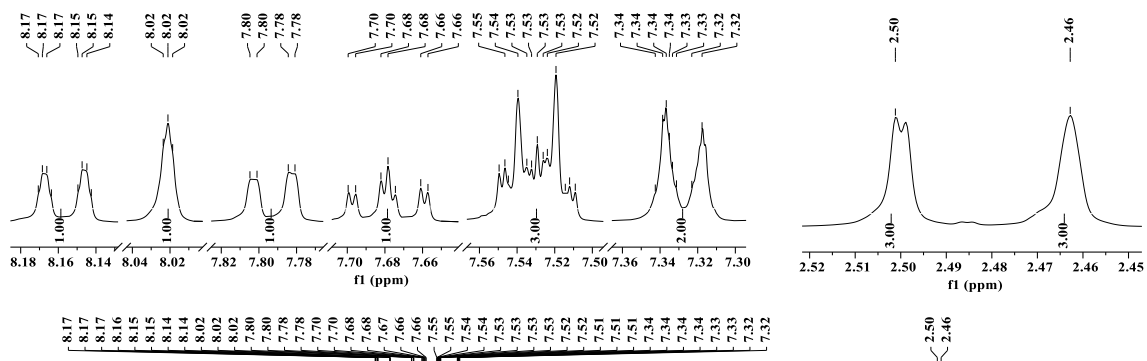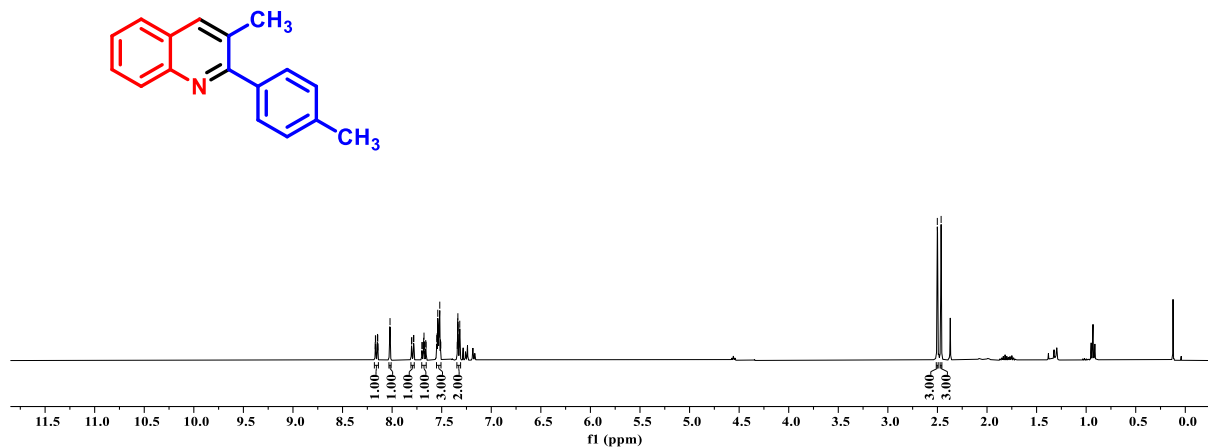

Fig. S54  $^1\text{H}$  NMR spectrum of 3s in  $\text{CDCl}_3$  (400 MHz).

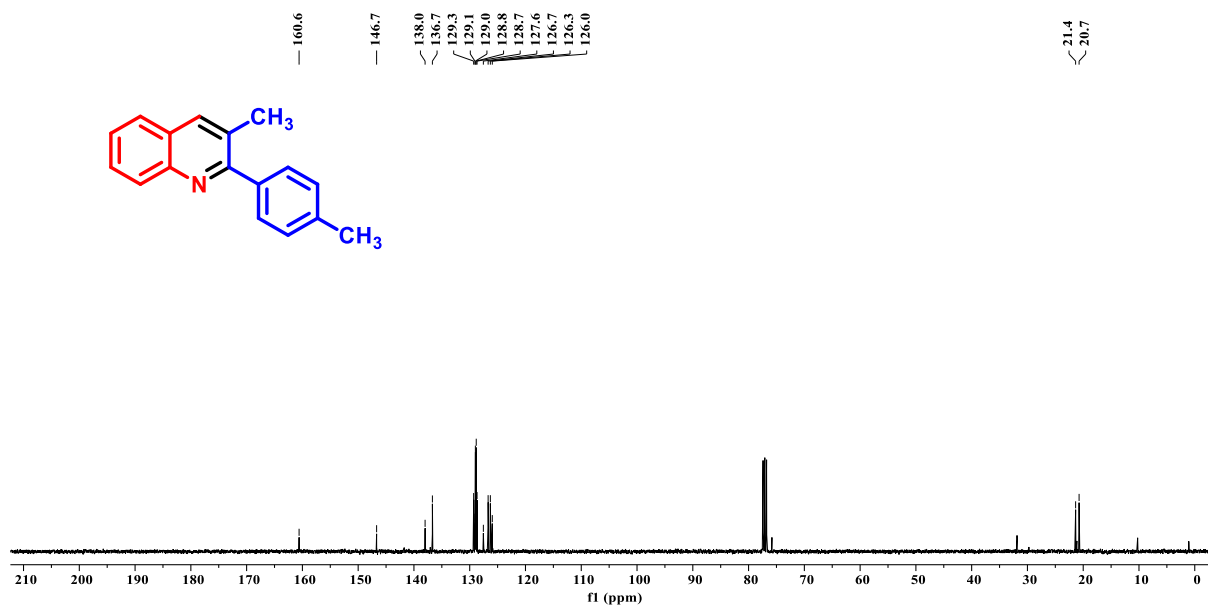

Fig. S55  $^{13}\text{C}\{^1\text{H}\}$  NMR spectrum of 3s in  $\text{CDCl}_3$  (101 MHz).





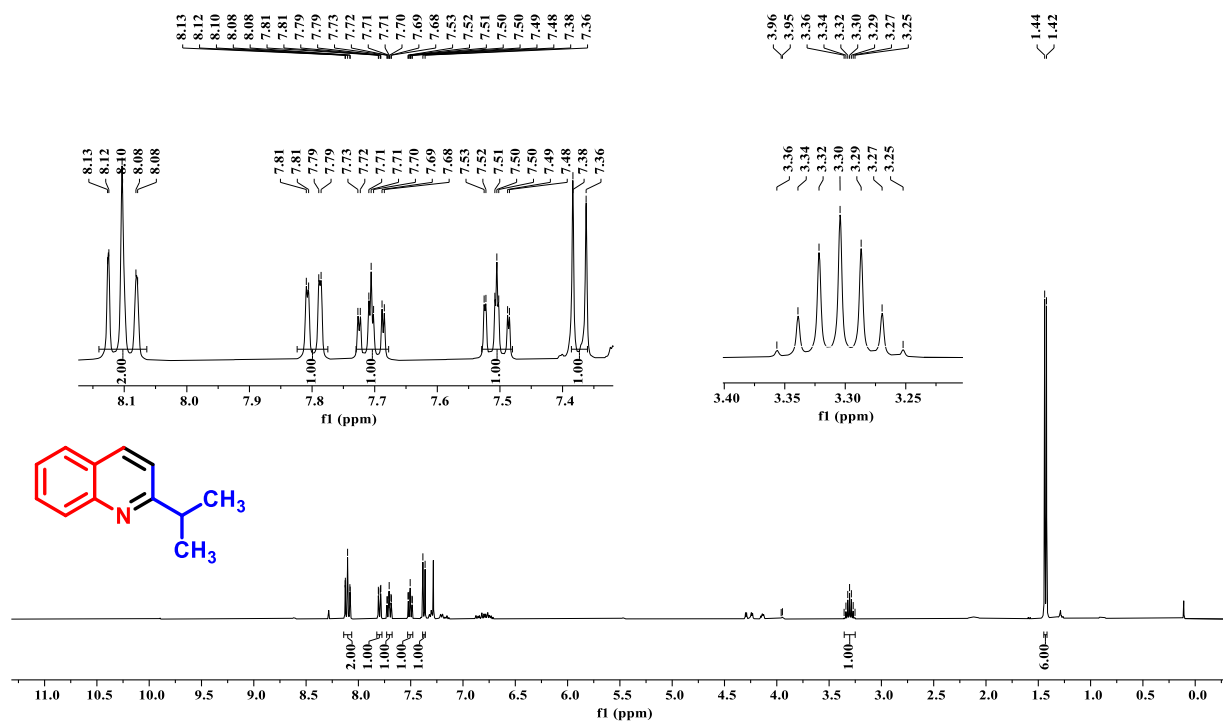

Fig. S60 <sup>1</sup>H NMR spectrum of 3v in CDCl<sub>3</sub> (400 MHz).

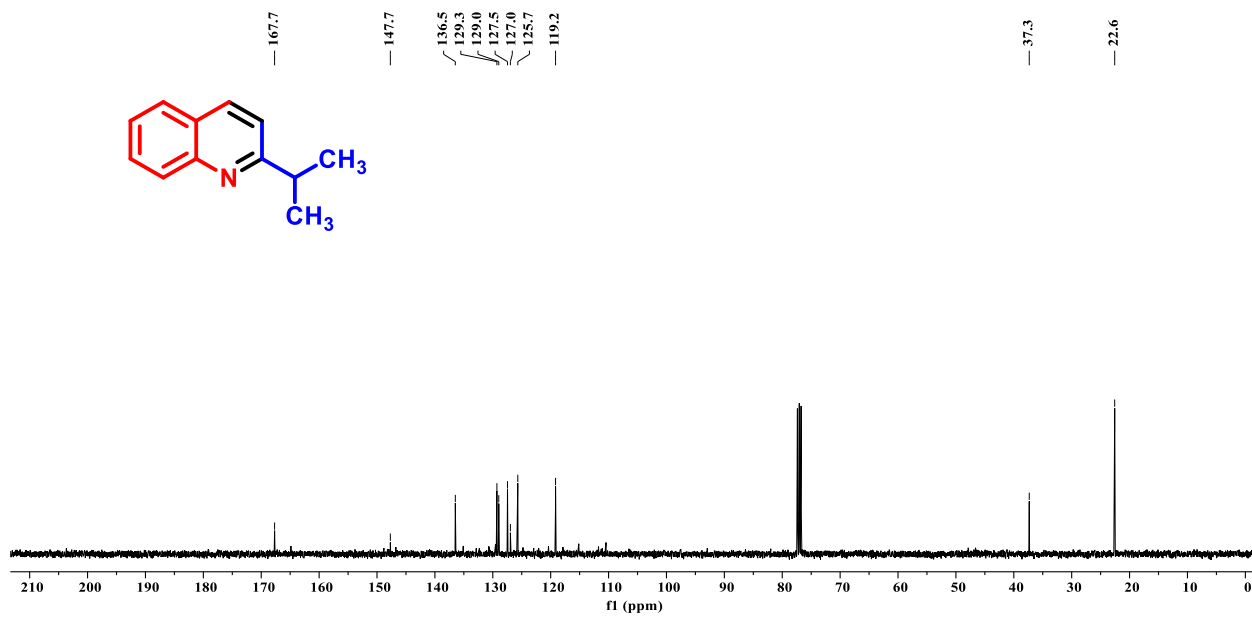

Fig. S61 <sup>13</sup>C {<sup>1</sup>H} NMR spectrum of 3v in CDCl<sub>3</sub> (101 MHz).

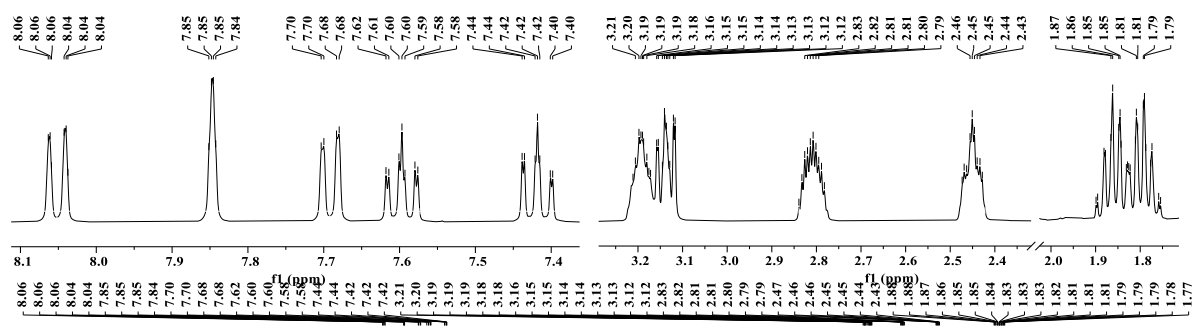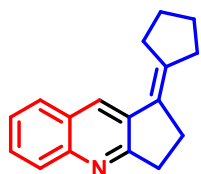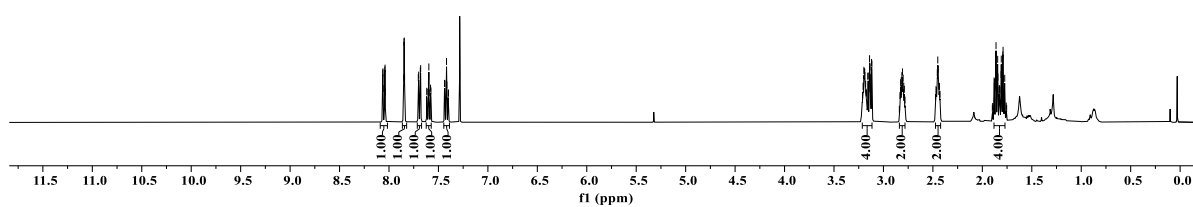

Fig. S62  $^1\text{H}$  NMR spectrum of **3w** in  $\text{CDCl}_3$  (400 MHz).

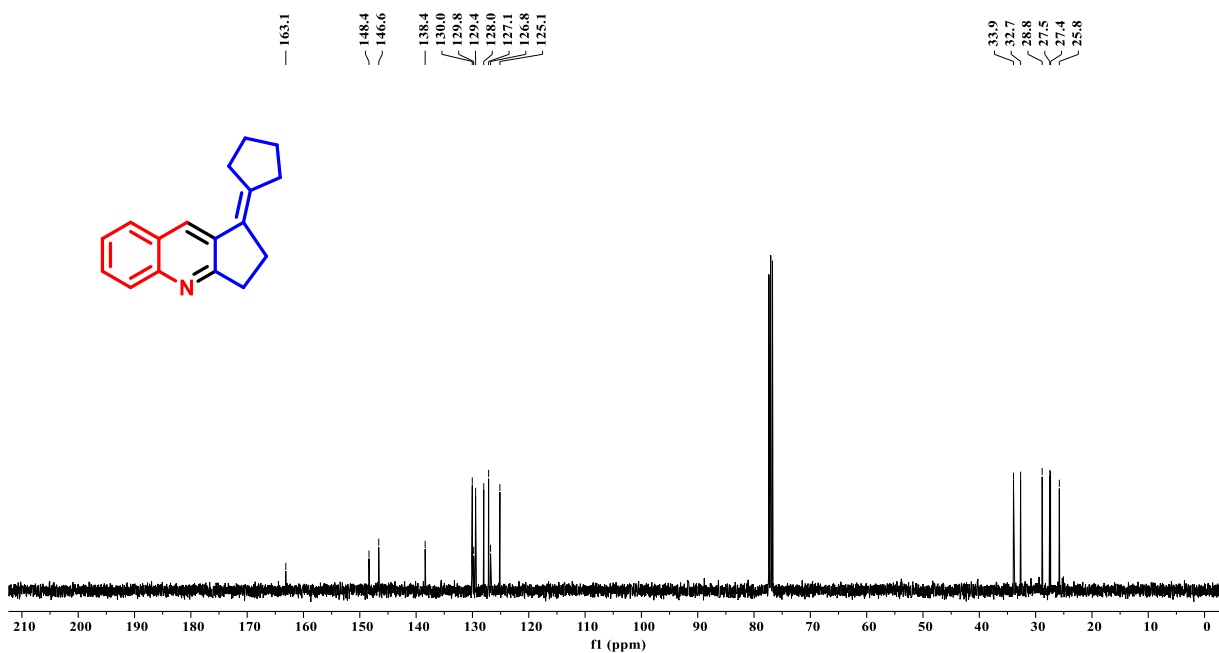

Fig. S63  $^{13}\text{C}\{^1\text{H}\}$  NMR spectrum of **3w** in  $\text{CDCl}_3$  (101 MHz).

## Sample Information

|                       |                     |                           |                                                                        |
|-----------------------|---------------------|---------------------------|------------------------------------------------------------------------|
| <b>Name</b>           | MSB-AP-QUINOLIN3-63 | <b>Data File Path</b>     | D:\Projects\MASS Data\Data\JULY-2024\MSB-AP-QUINOLIN3-63.d             |
| <b>Sample ID</b>      |                     | <b>Acq. Time (Local)</b>  | 02-07-2024 17:20:13 (UTC+05:30)                                        |
| <b>Instrument</b>     | LCMSQTOF-G6545B     | <b>Method Path (Acq)</b>  | D:\Projects\MASS Data\Methods\A1B1_POS_100-600_4000_500_80_new.m       |
| <b>MS Type</b>        | QTOF                | <b>Version (Acq SW)</b>   | 6200 series TOF/6500 series Q-TOF (11.0.203.0)                         |
| <b>Inj. Vol. (ul)</b> | 0.5                 | <b>IRM Status</b>         | Success                                                                |
| <b>Position</b>       | PIA1                | <b>Method Path (DA)</b>   | C:\Users\LCMS QTOF G6545\Desktop\Report Templates\REPORT METHOD\HRMS.m |
| <b>Plate Pos.</b>     |                     | <b>Target Source Path</b> |                                                                        |
| <b>Operator</b>       | SYSTEM (SYSTEM)     | <b>Result Summary</b>     | 1 qualified (1 targets)                                                |

## Sample Spectra

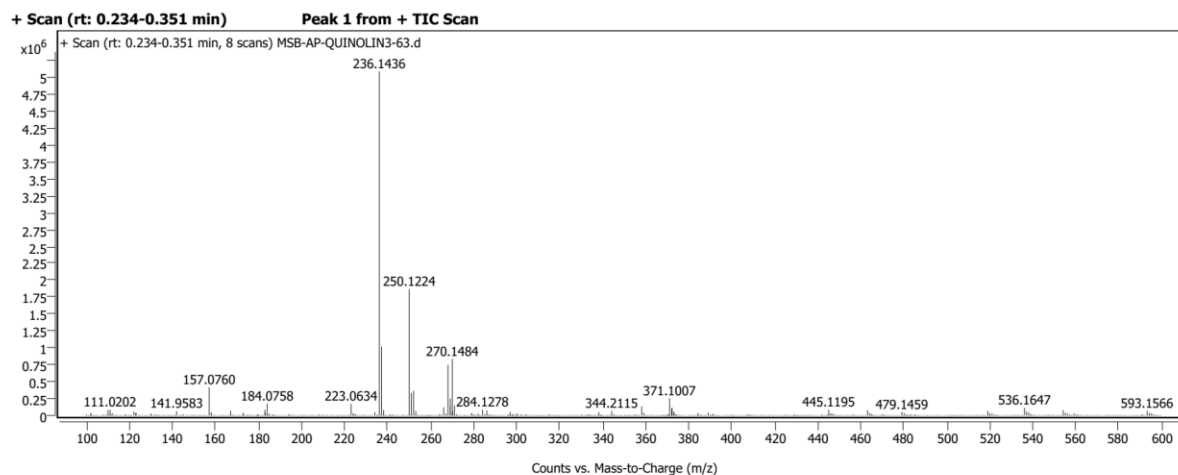

## Compound Details

## Cpd. 1: C17 H17 N

| Formula   | m/z      | Observed M/Z     | Difference Da     | Difference PPM    | Score |
|-----------|----------|------------------|-------------------|-------------------|-------|
| C17 H17 N | 236.1436 | 236.143622937519 | 0.137440141372736 | 0.584513146369025 | 99.00 |

## Compound Spectra (Zoomed)

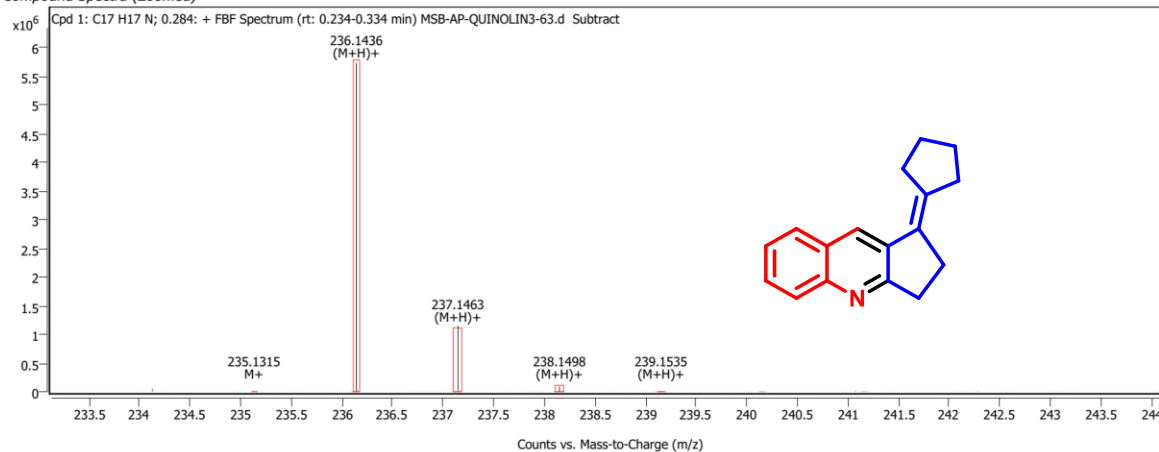

MassHunter Qual 10.0  
(End of Report)

Fig. S64 HRMS spectrum of **3w**.



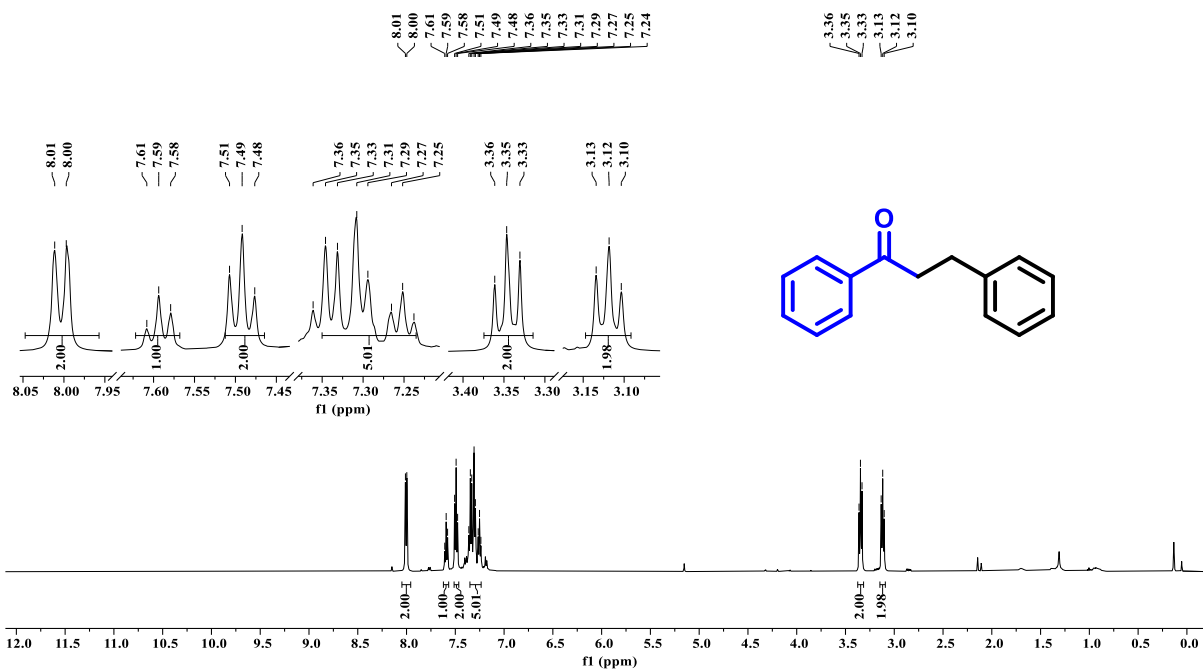

Fig. S65  $^1\text{H}$  NMR spectrum of 5a in  $\text{CDCl}_3$  (500 MHz).

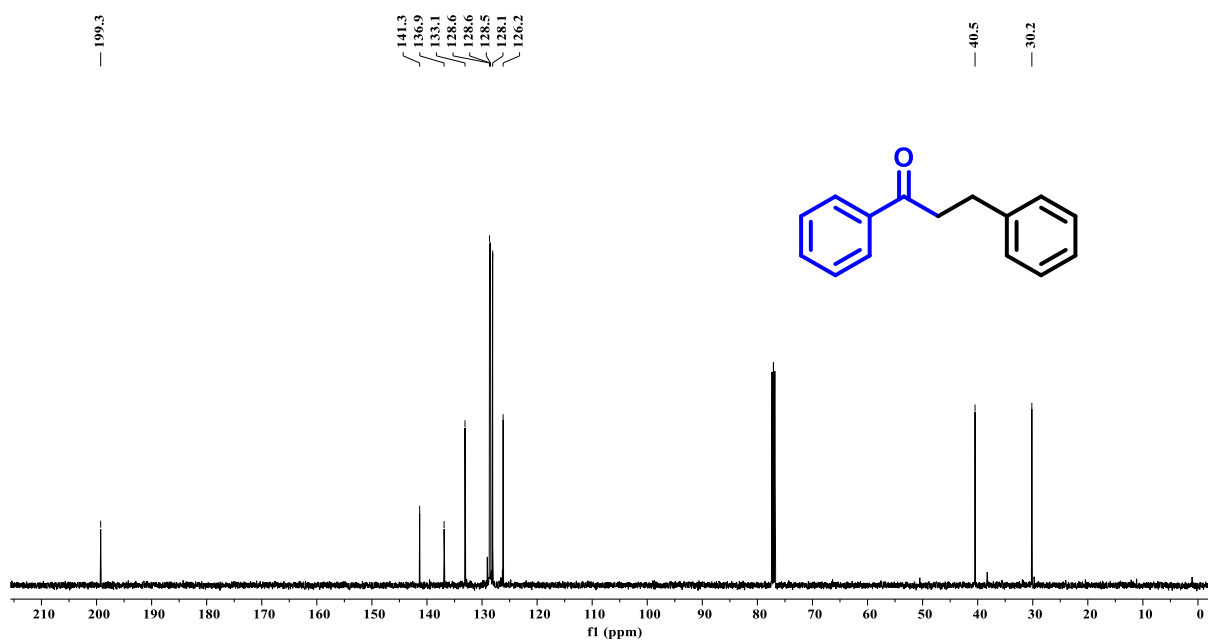

Fig. S66  $^{13}\text{C}\{^1\text{H}\}$  NMR spectrum of 5a in  $\text{CDCl}_3$  (126 MHz).

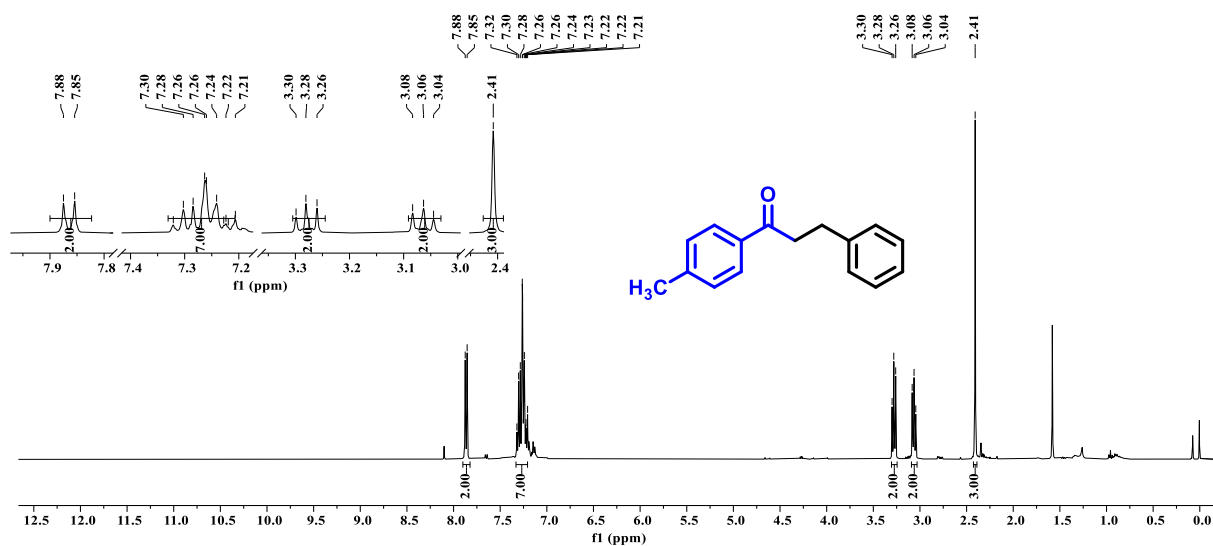

**Fig. S67**  $^1\text{H}$  NMR spectrum of **5b** in  $\text{CDCl}_3$  (400 MHz).

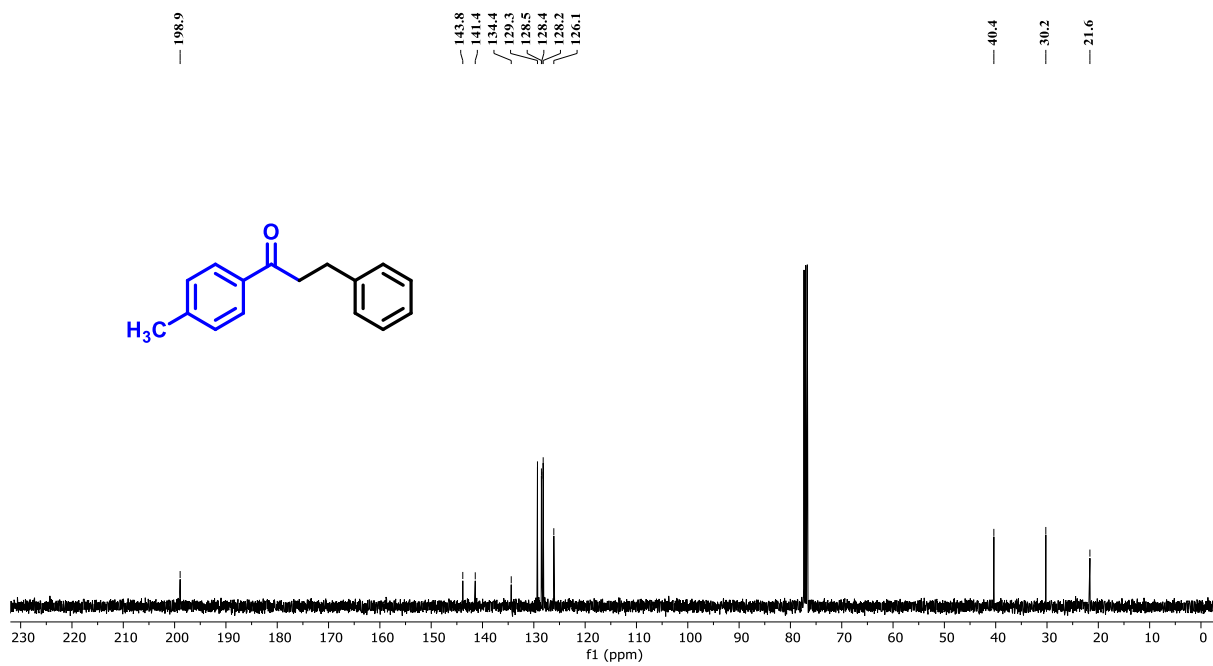

**Fig. S68**  $^{13}\text{C}$   $\{^1\text{H}\}$  NMR spectrum of **5b** in  $\text{CDCl}_3$  (101 MHz).

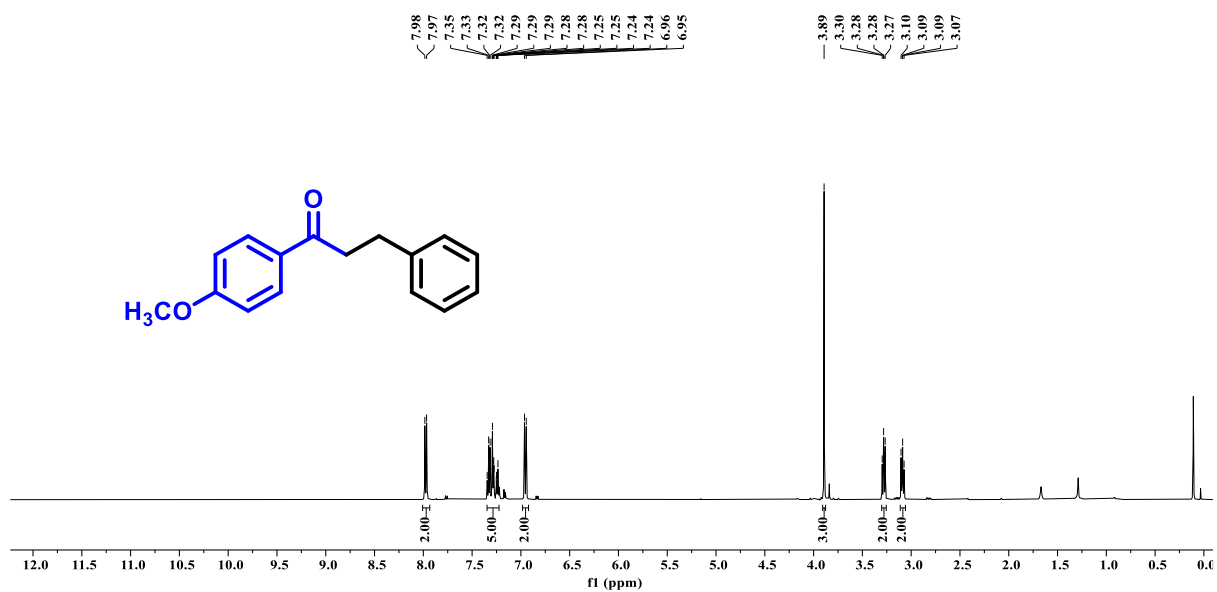

**Fig. S69**  $^1\text{H}$  NMR spectrum of **5c** in  $\text{CDCl}_3$  (500 MHz).

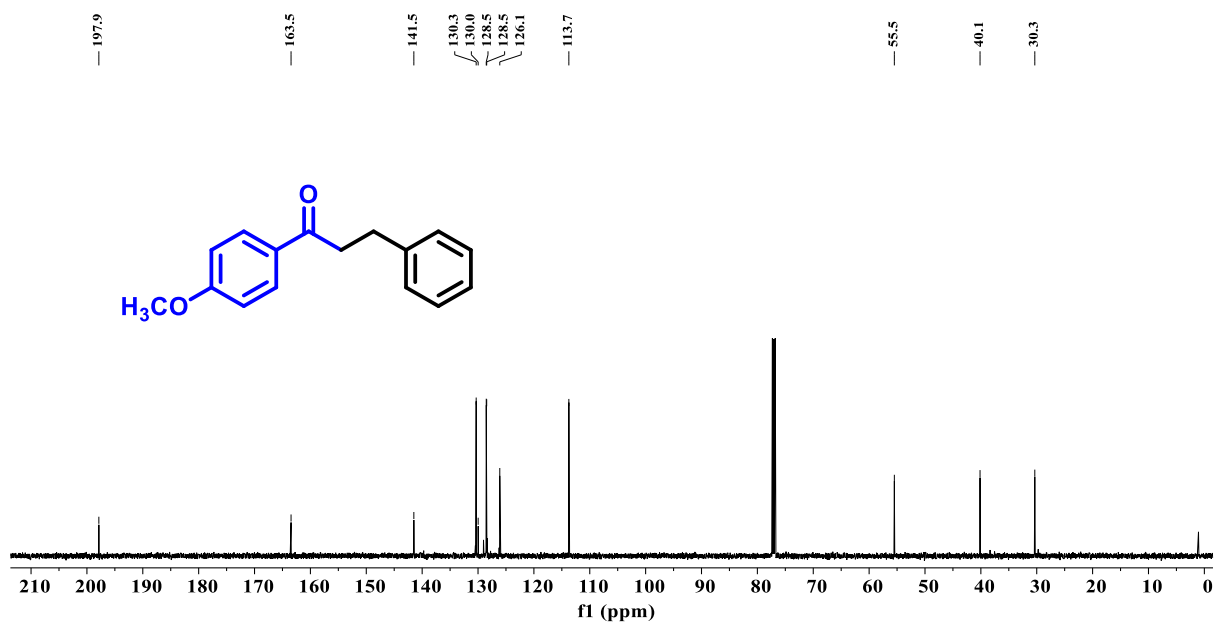

**Fig. S70**  $^{13}\text{C}\{^1\text{H}\}$  NMR spectrum of **5c** in  $\text{CDCl}_3$  (126 MHz).

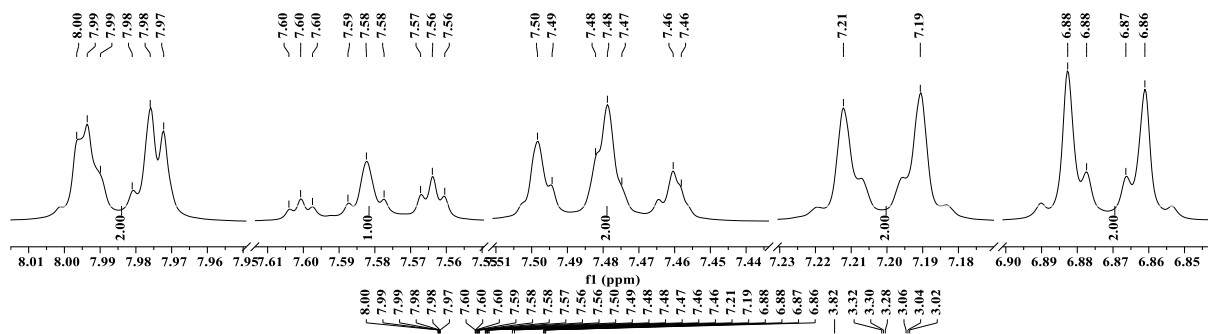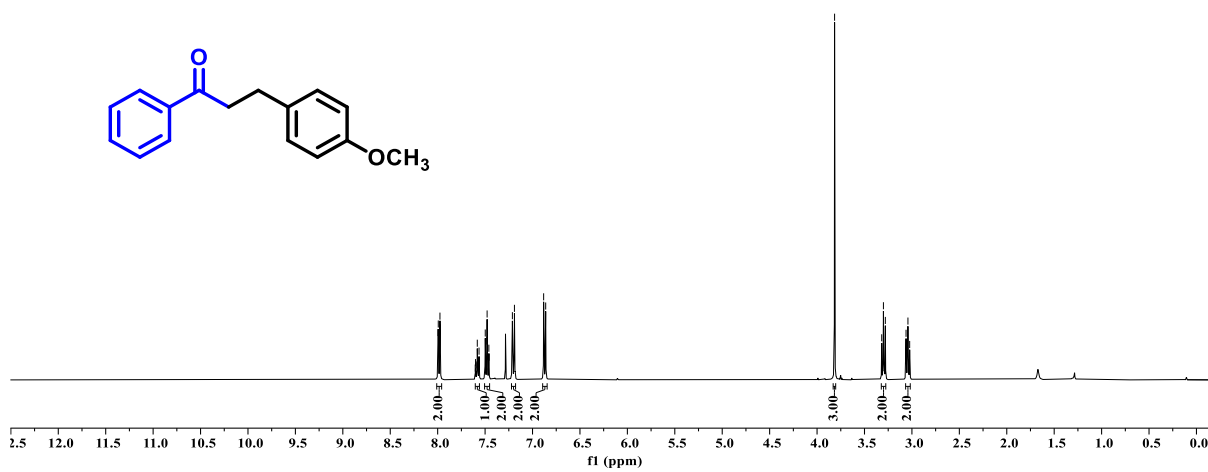

**Fig. S71**  $^1\text{H}$  NMR spectrum of **5d** in  $\text{CDCl}_3$  (400 MHz).

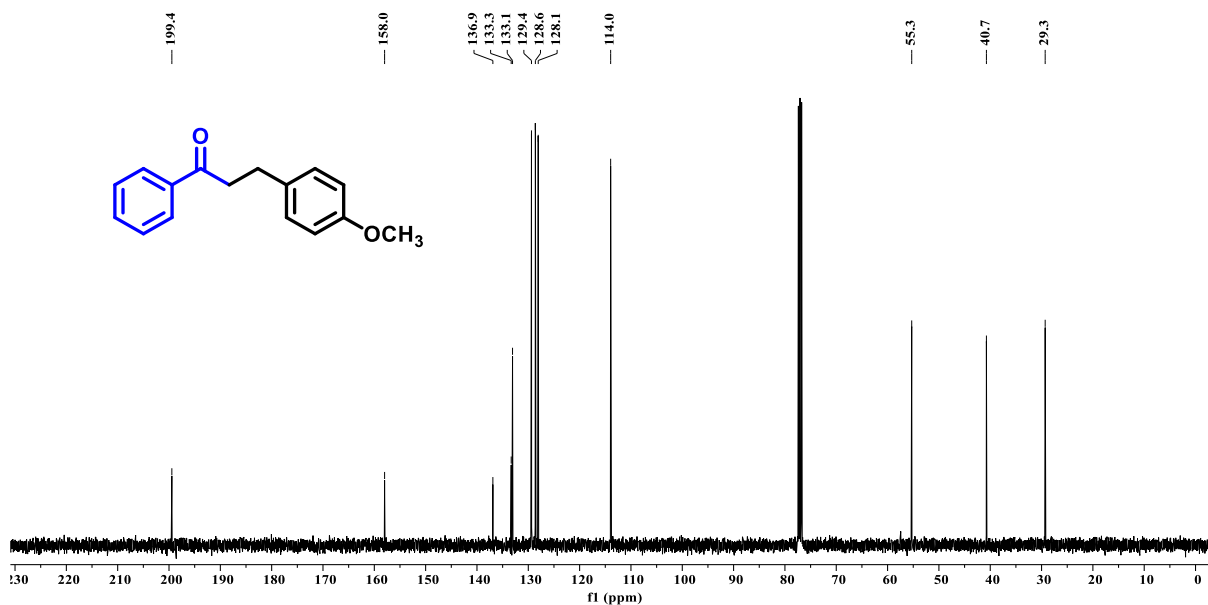

**Fig. S72**  $^{13}\text{C}\{^1\text{H}\}$  NMR spectrum of **5d** in  $\text{CDCl}_3$  (101 MHz).

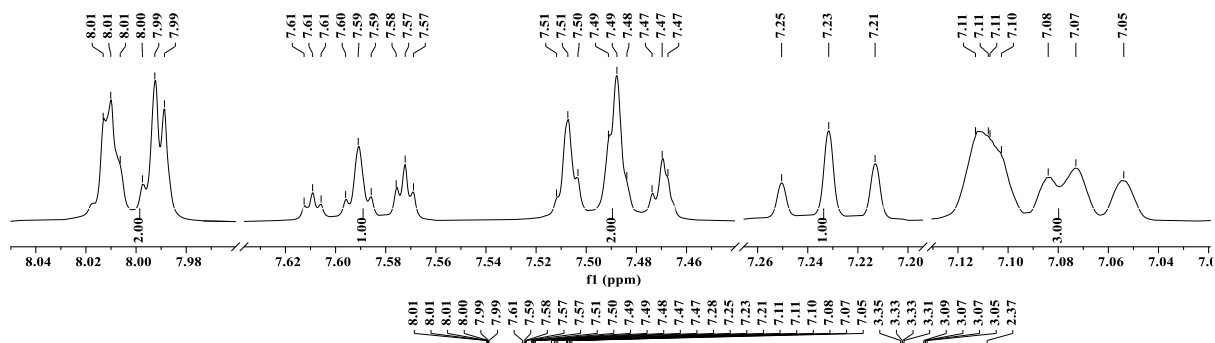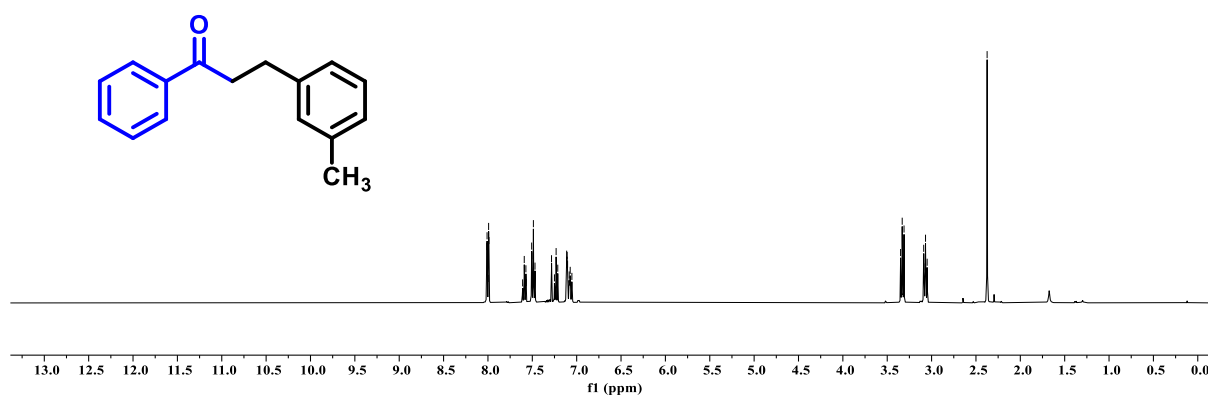

Fig. S73  $^1\text{H}$  NMR spectrum of **5e** in  $\text{CDCl}_3$  (400 MHz).

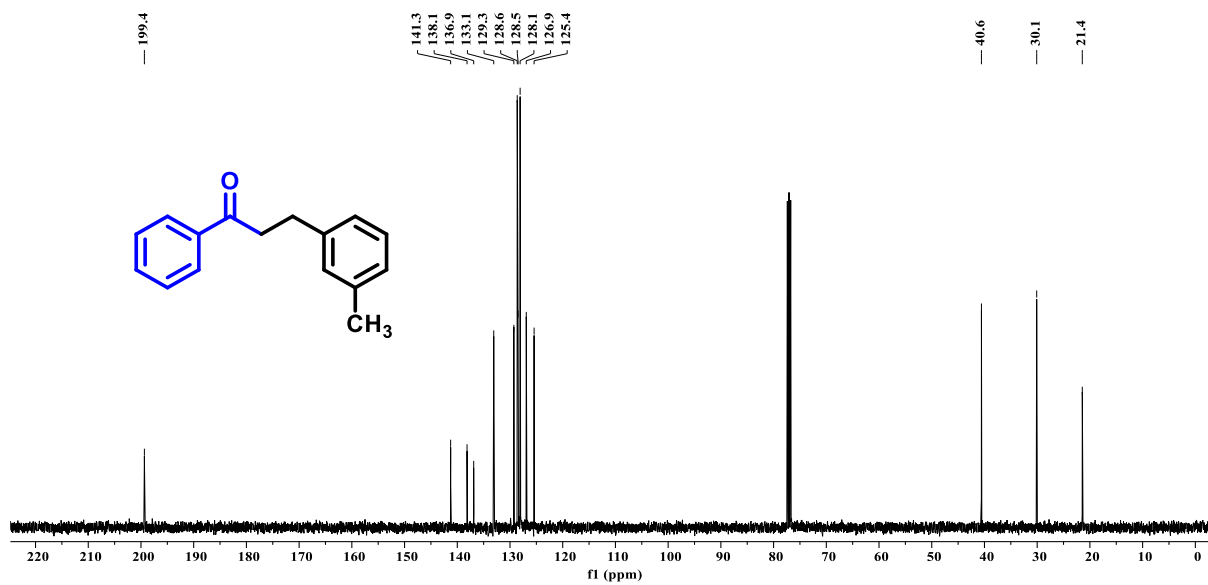

Fig. S74  $^{13}\text{C}\{^1\text{H}\}$  NMR spectrum of **5e** in  $\text{CDCl}_3$  (101 MHz).

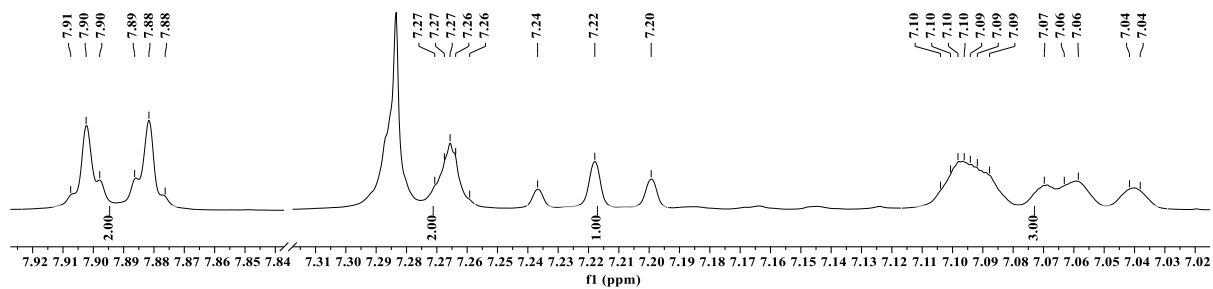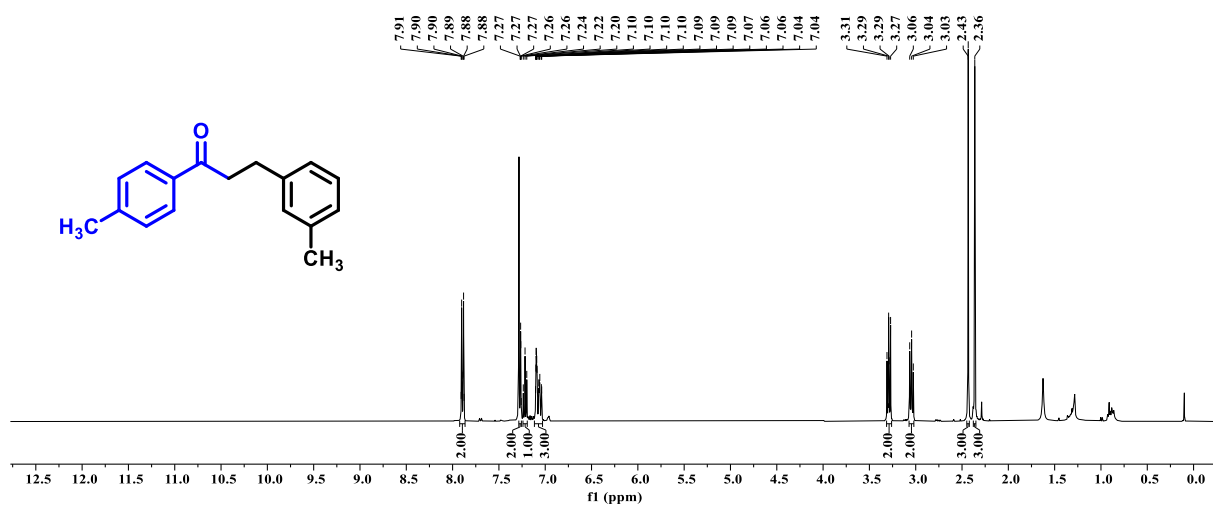

Fig. S75  $^1\text{H}$  NMR spectrum of **5f** in  $\text{CDCl}_3$  (400 MHz).

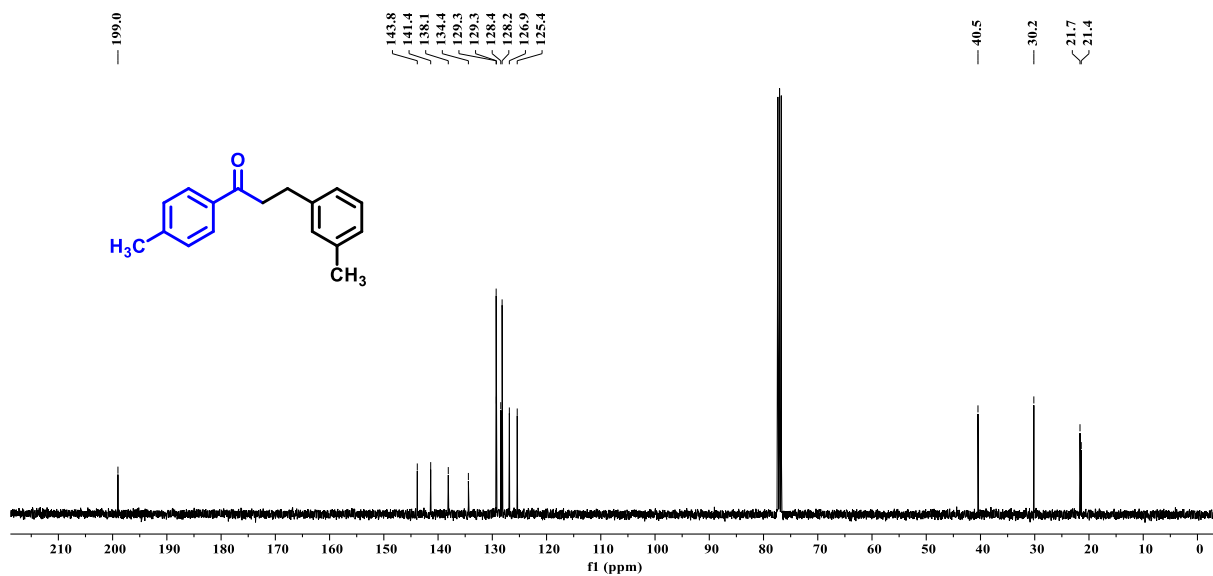

Fig. S76  $^{13}\text{C}\{^1\text{H}\}$  NMR spectrum of **5f** in  $\text{CDCl}_3$  (101 MHz).

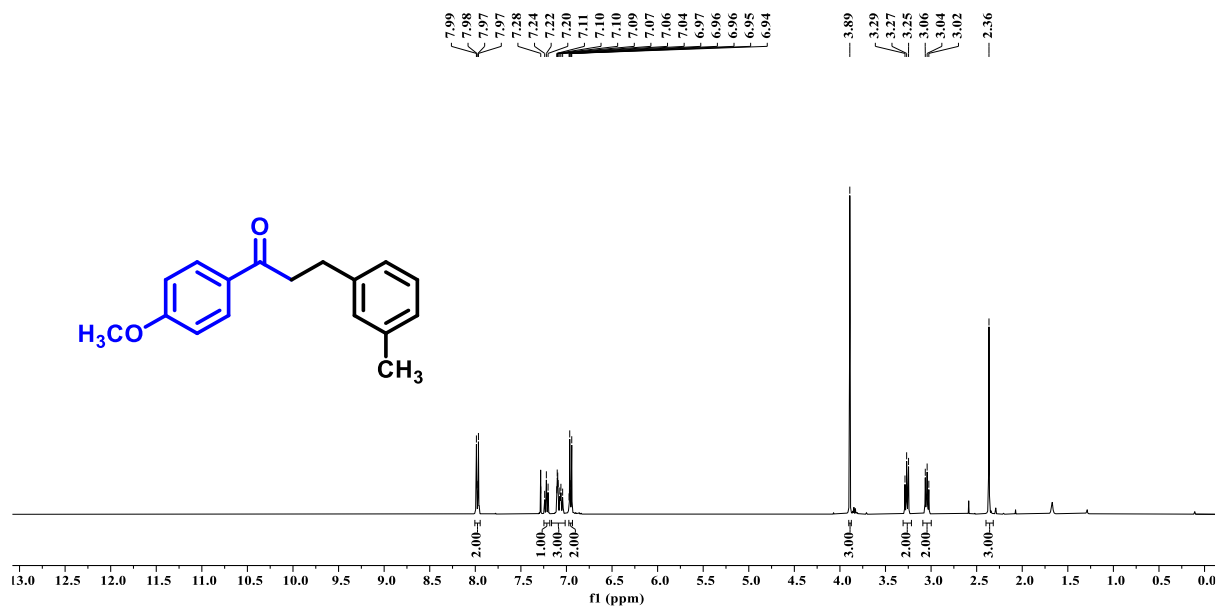

**Fig. S77**  $^1\text{H}$  NMR spectrum of **5g** in  $\text{CDCl}_3$  (400 MHz).

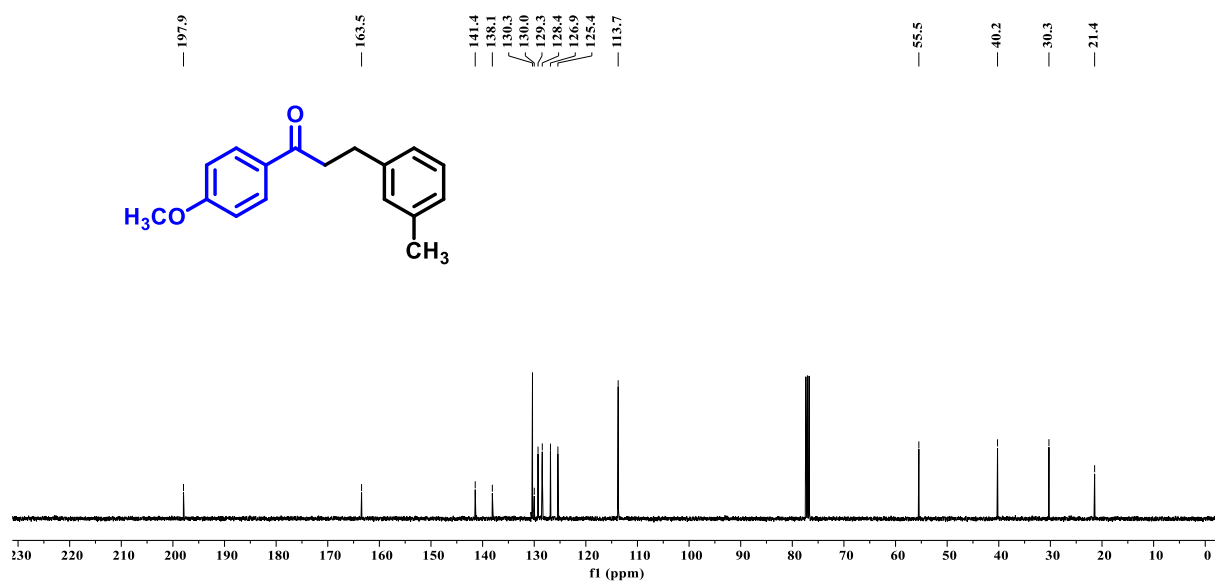

**Fig. S78**  $^{13}\text{C}\{^1\text{H}\}$  NMR spectrum of **5g** in  $\text{CDCl}_3$  (101 MHz).

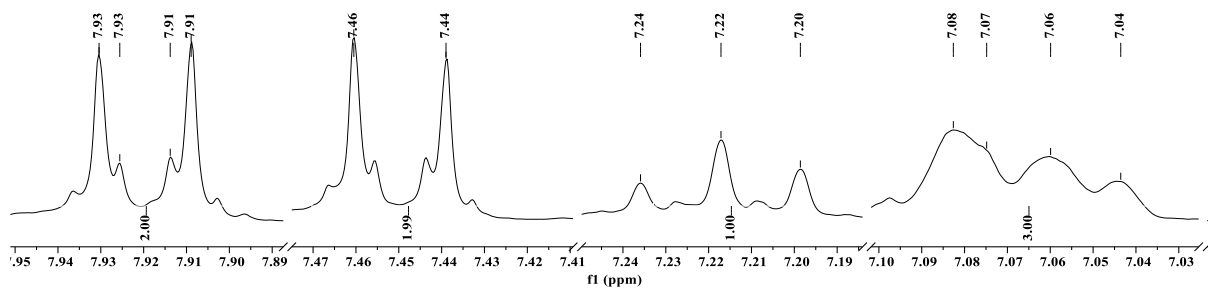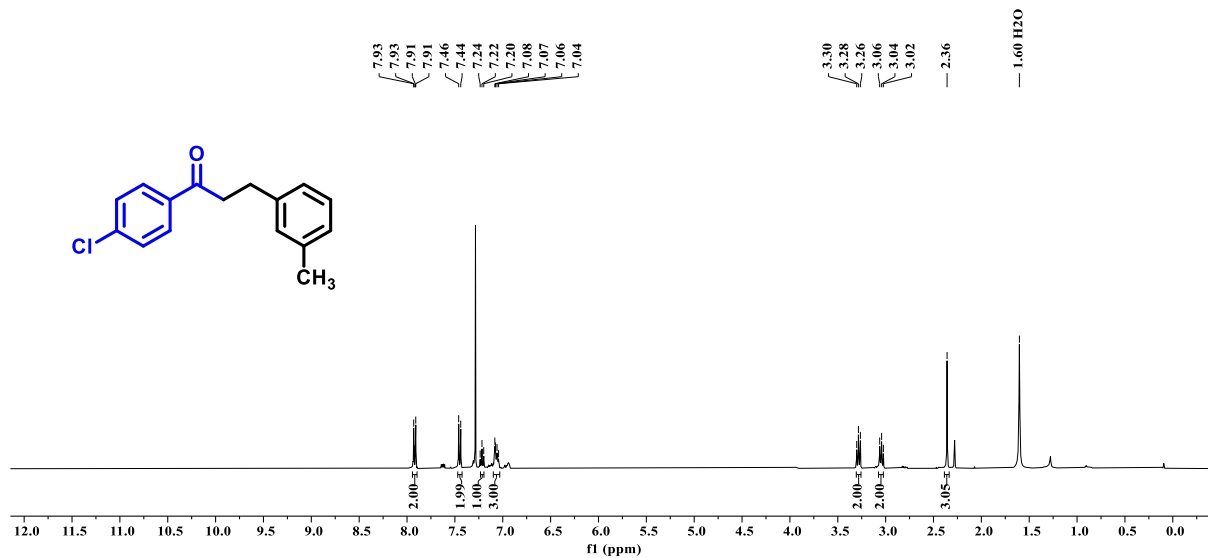

**Fig. S79**  $^1\text{H}$  NMR spectrum of **5h** in  $\text{CDCl}_3$  (400 MHz).

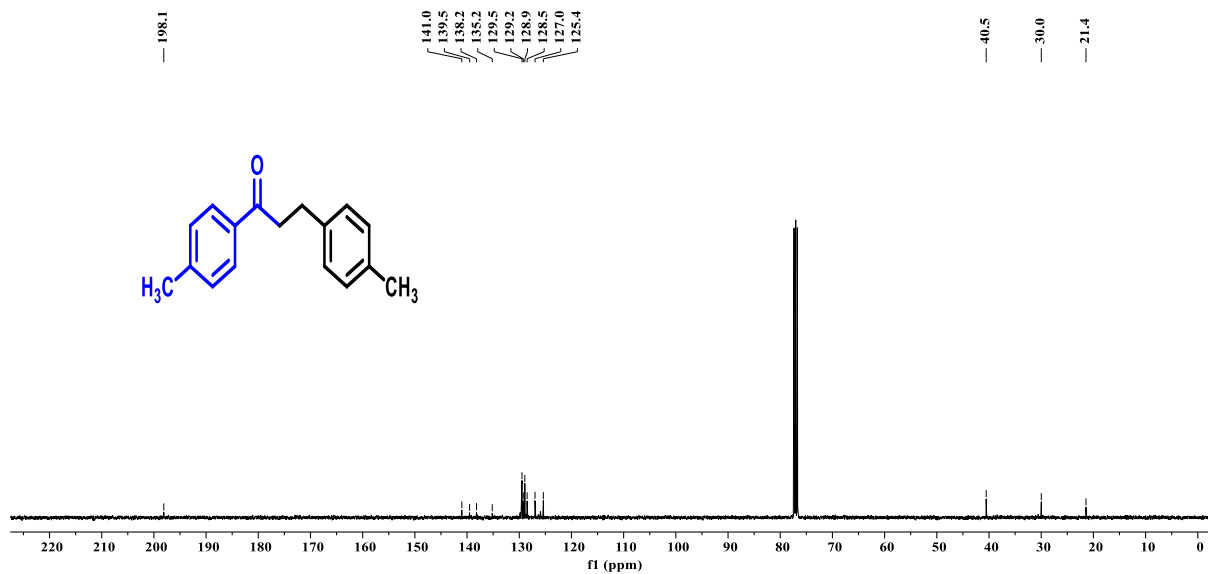

**Fig. S80**  $^{13}\text{C}\{^1\text{H}\}$  NMR spectrum of **5h** in  $\text{CDCl}_3$  (101 MHz).



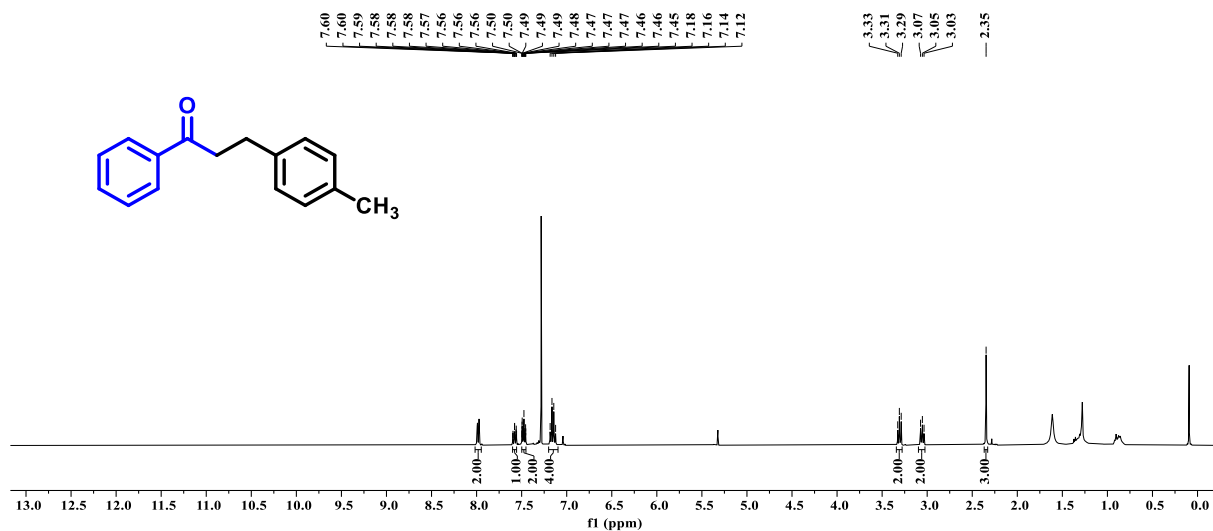

**Fig. S81**  $^1\text{H}$  NMR spectrum of **5i** in  $\text{CDCl}_3$  (400 MHz).

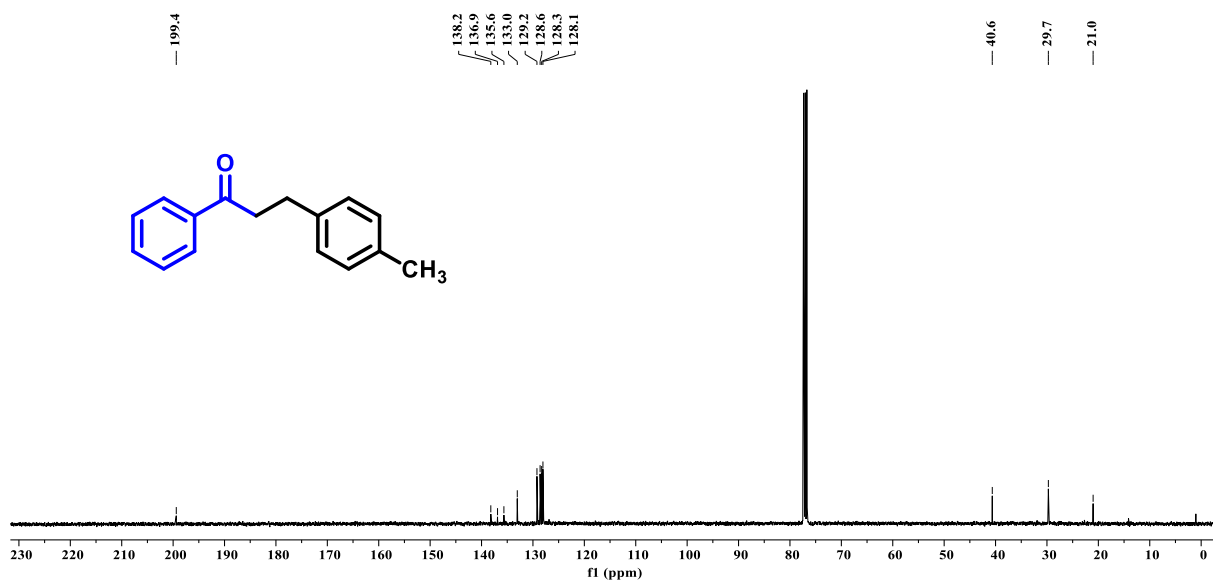

**Fig. S82**  $^{13}\text{C}\{^1\text{H}\}$  NMR spectrum of **5i** in  $\text{CDCl}_3$  (101 MHz).

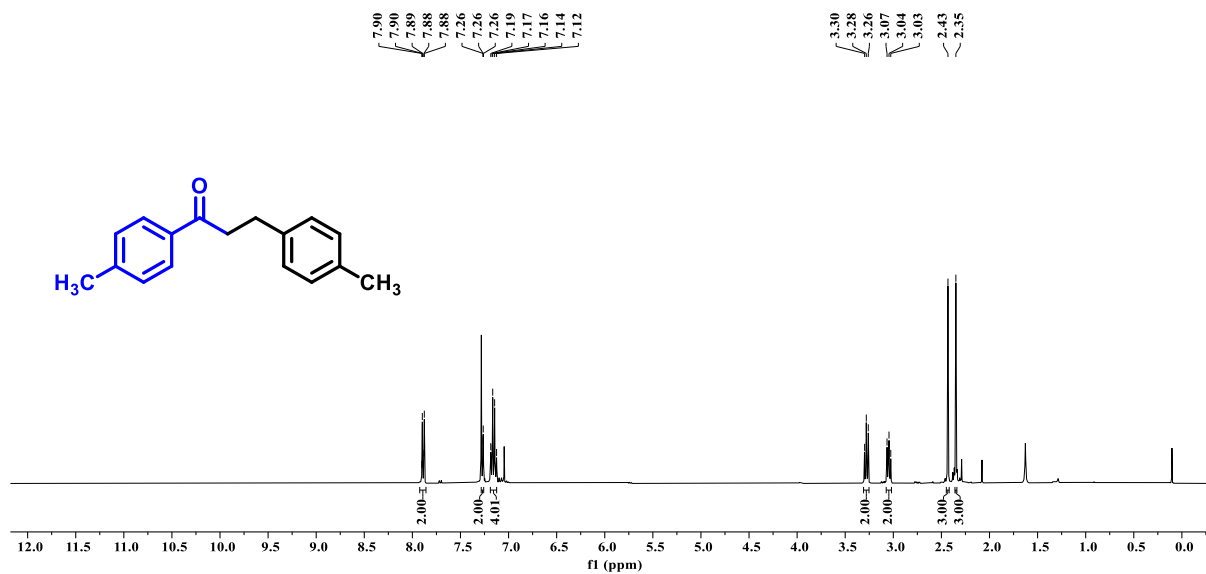

**Fig. S83**  $^1\text{H}$  NMR spectrum of **5j** in  $\text{CDCl}_3$  (400 MHz).

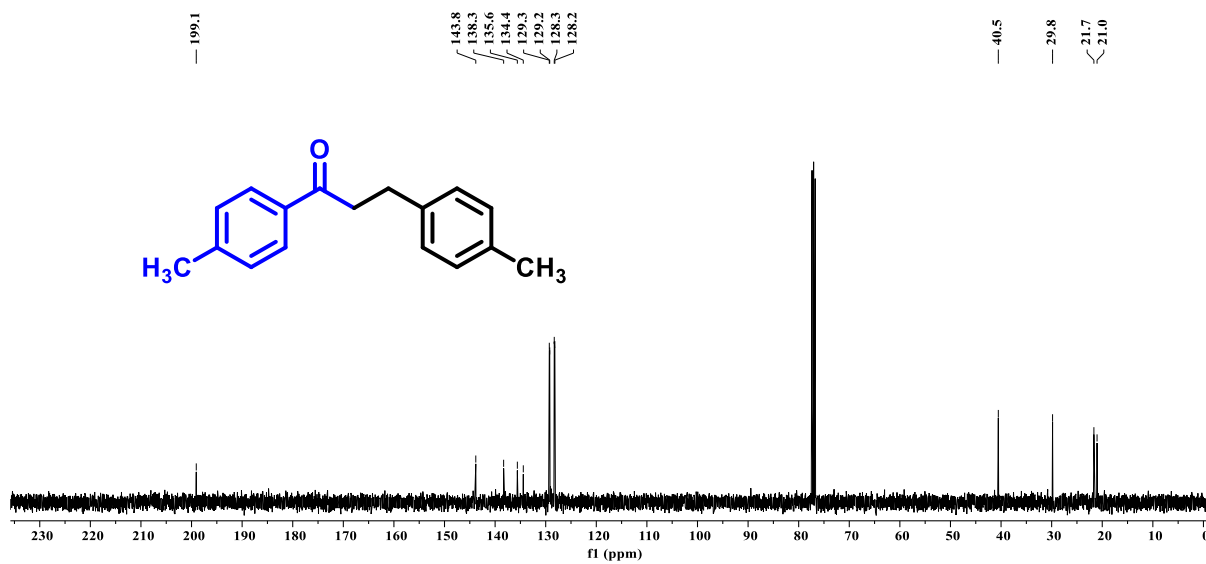

**Fig. S84**  $^{13}\text{C}\{^1\text{H}\}$  NMR spectrum of **5j** in  $\text{CDCl}_3$  (101 MHz).

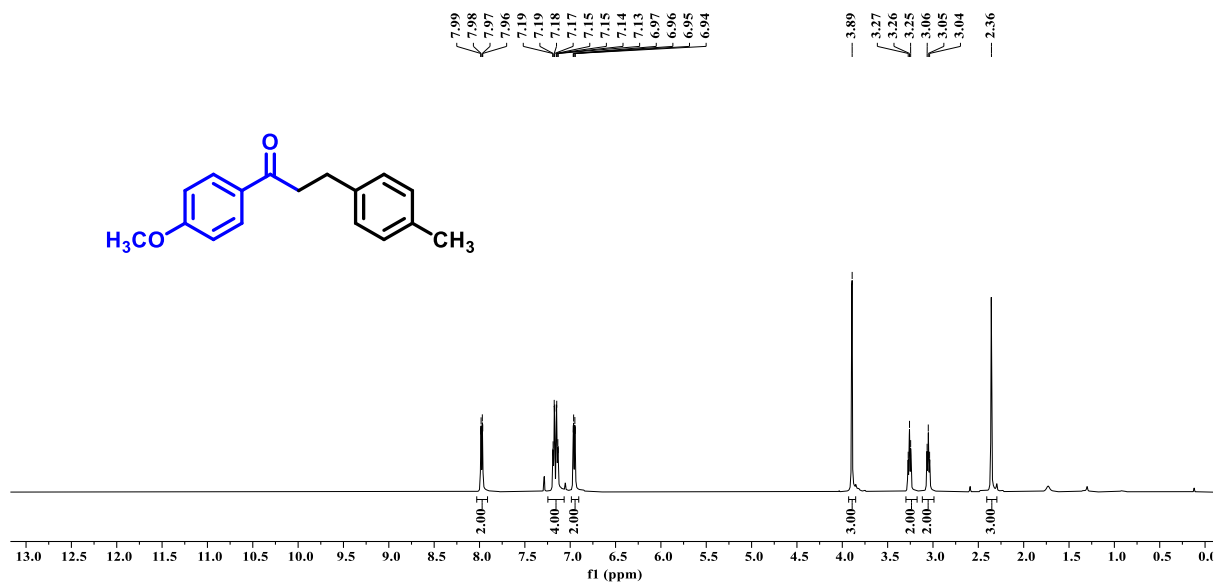

**Fig. S85**  $^1\text{H}$  NMR spectrum of **5k** in  $\text{CDCl}_3$  (500 MHz).

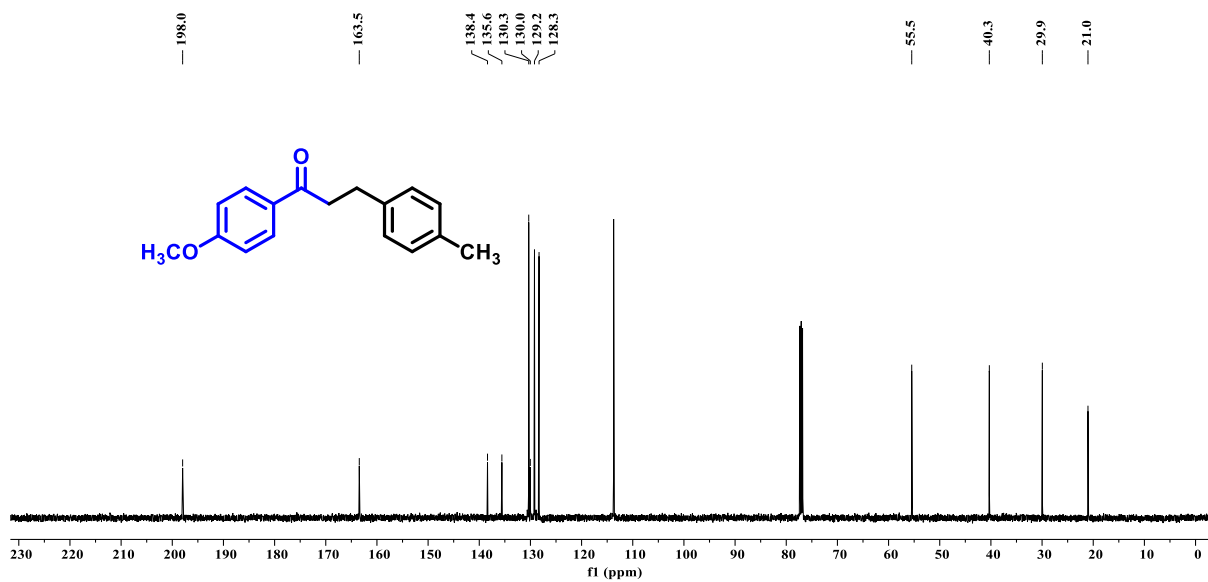

**Fig. S86**  $^{13}\text{C}$   $\{^1\text{H}\}$  NMR spectrum of **5k** in  $\text{CDCl}_3$  (126 MHz).

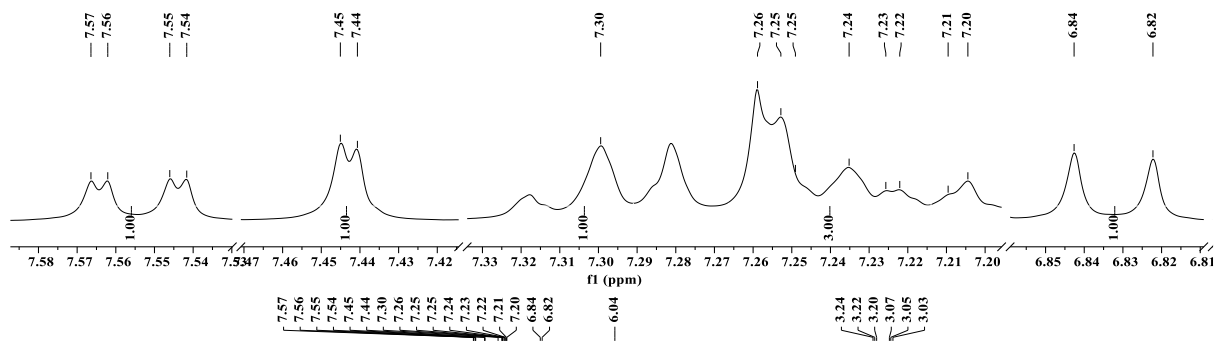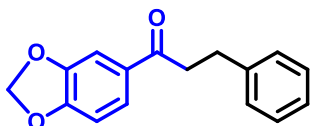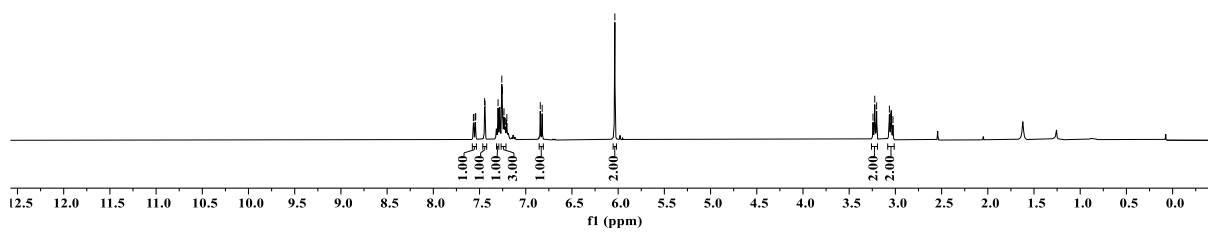

**Fig. S87**  $^1\text{H}$  NMR spectrum of **5l** in  $\text{CDCl}_3$  (400 MHz).

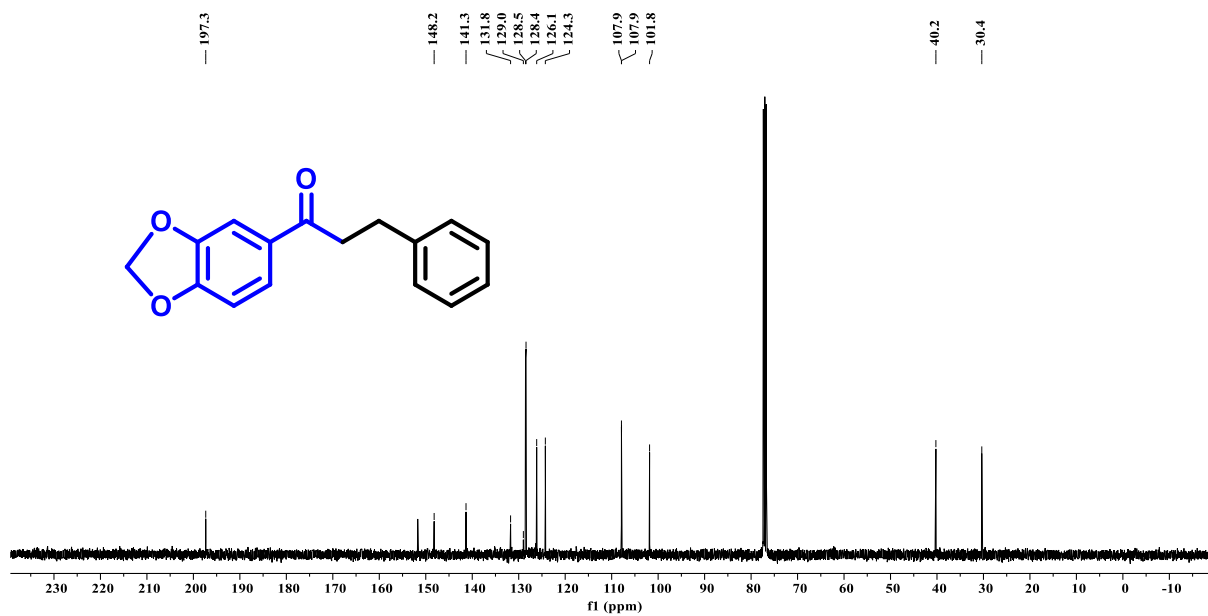

**Fig. S88**  $^{13}\text{C}\{^1\text{H}\}$  NMR spectrum of **5l** in  $\text{CDCl}_3$  (101 MHz).

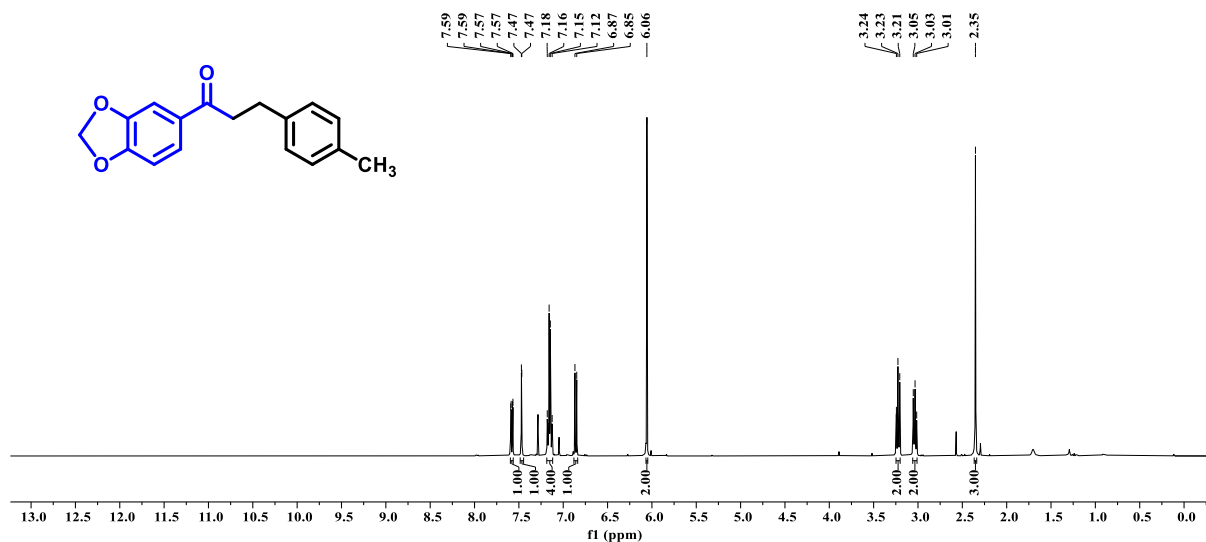

**Fig. S89**  $^1\text{H}$  NMR spectrum of **5m** in  $\text{CDCl}_3$  (400 MHz).

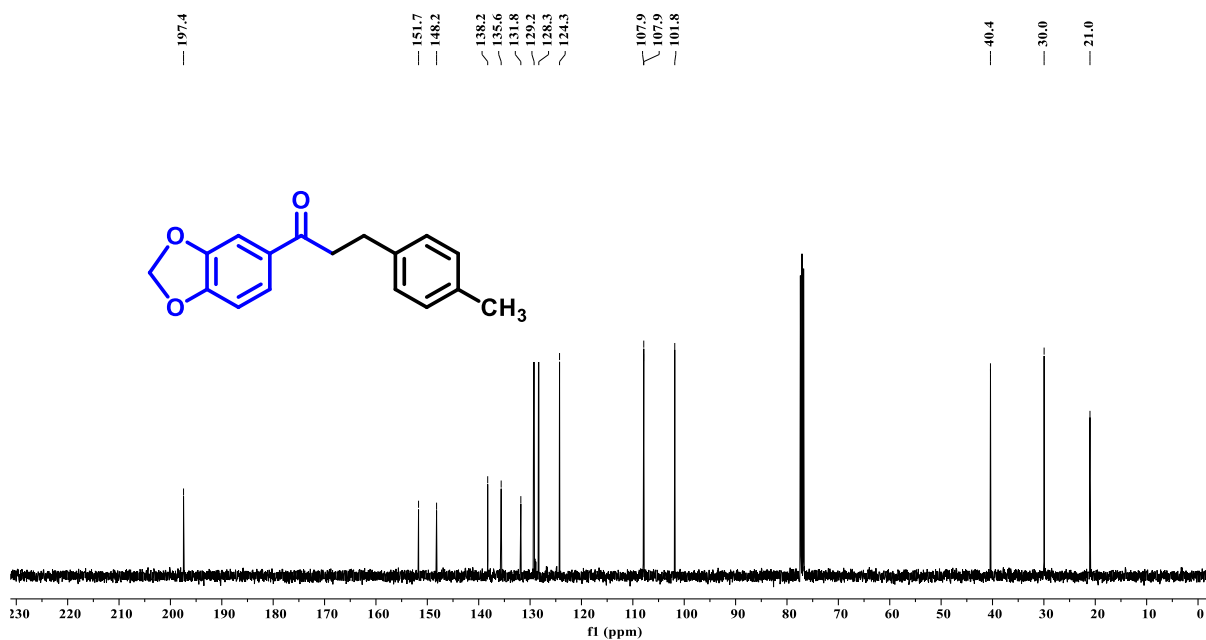

**Fig. S90**  $^{13}\text{C}$   $\{^1\text{H}\}$  NMR spectrum of **5m** in  $\text{CDCl}_3$  (101 MHz).

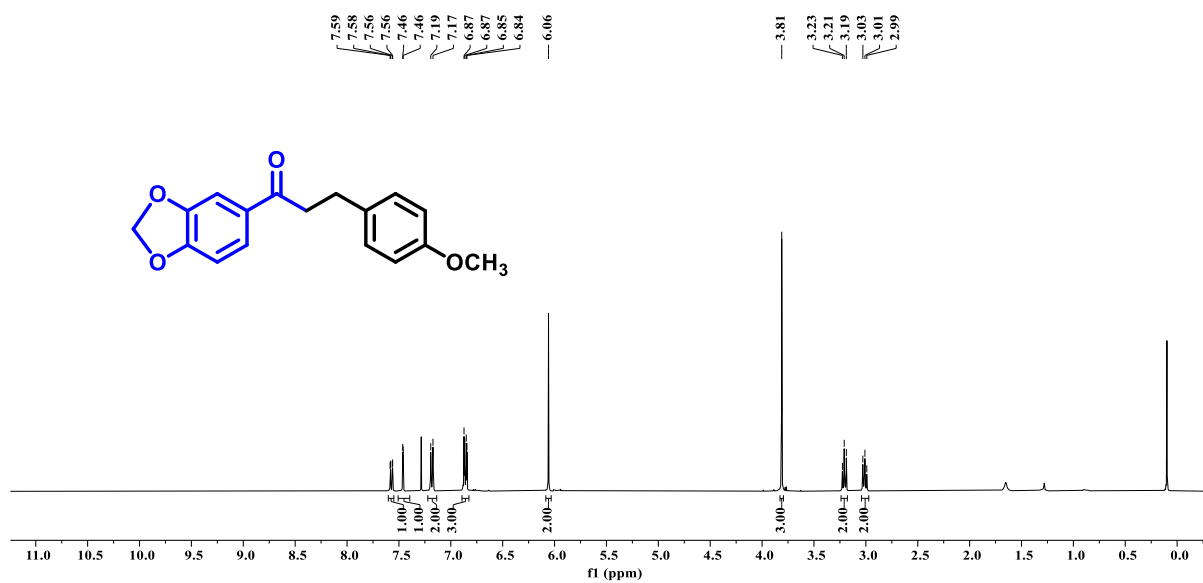

**Fig. S91**  $^1\text{H}$  NMR spectrum of **5n** in  $\text{CDCl}_3$  (400 MHz).

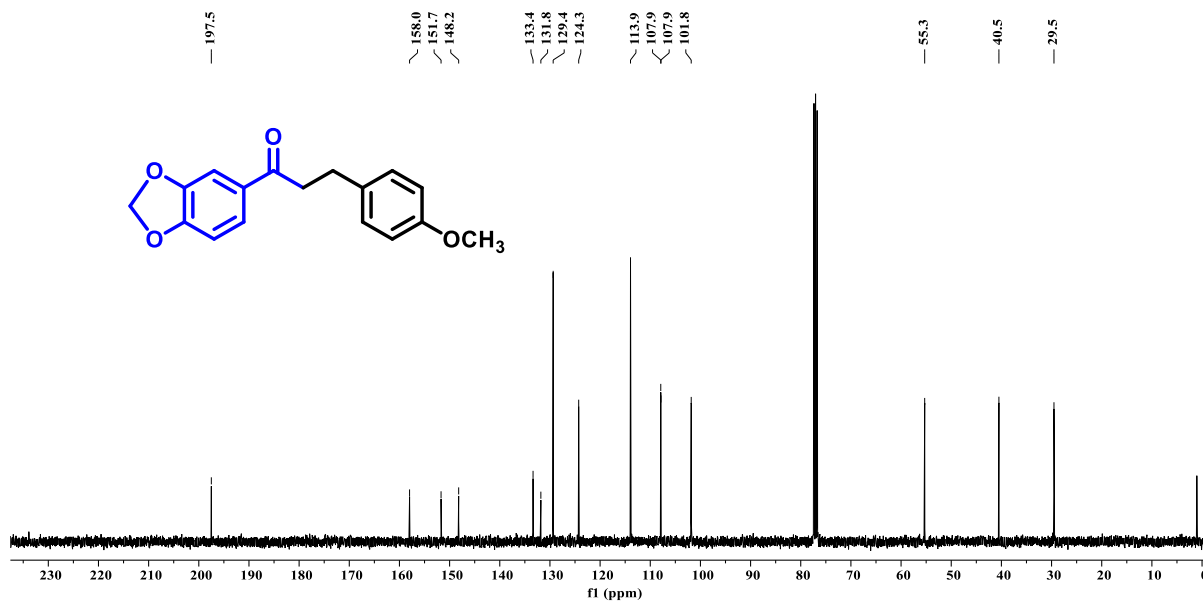

**Fig. S92**  $^{13}\text{C}$   $\{^1\text{H}\}$  NMR spectrum of **5n** in  $\text{CDCl}_3$  (101 MHz).

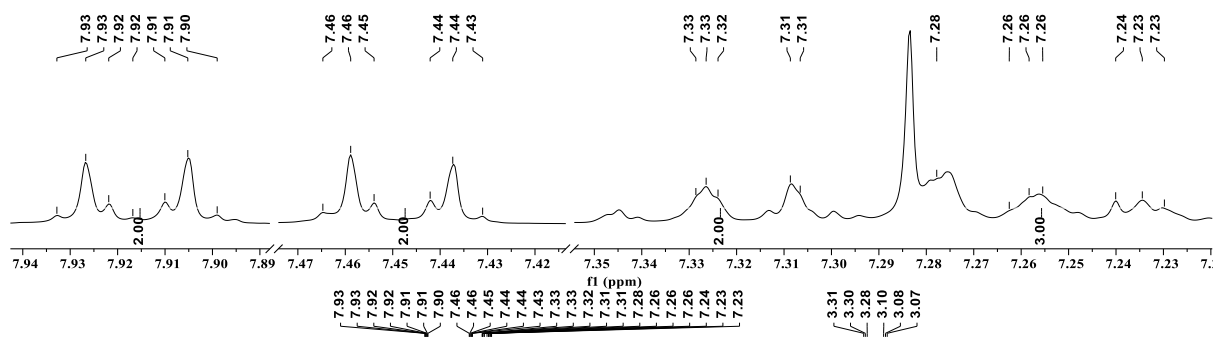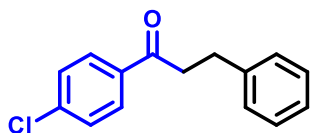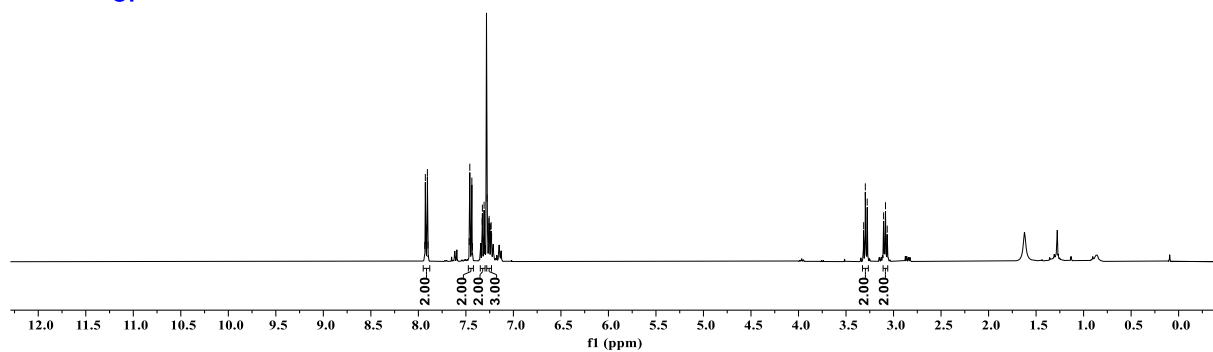

Fig. S93  $^1\text{H}$  NMR spectrum of **5o** in  $\text{CDCl}_3$  (400 MHz).

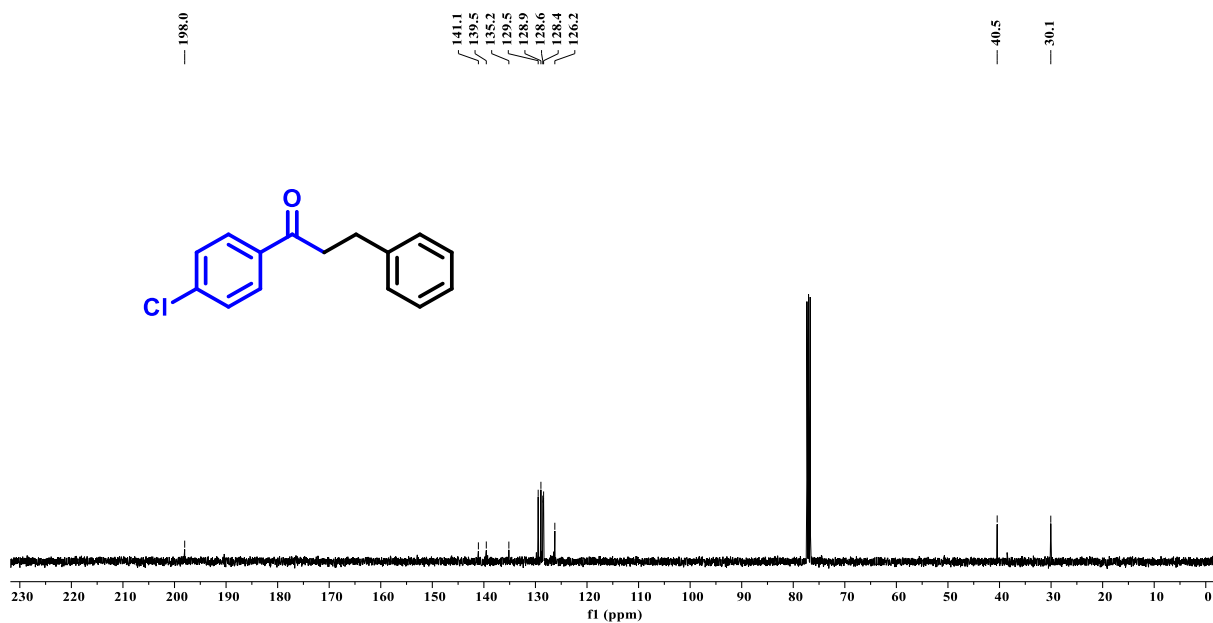

Fig. S94  $^{13}\text{C}\{^1\text{H}\}$  NMR spectrum of **5o** in  $\text{CDCl}_3$  (101 MHz).

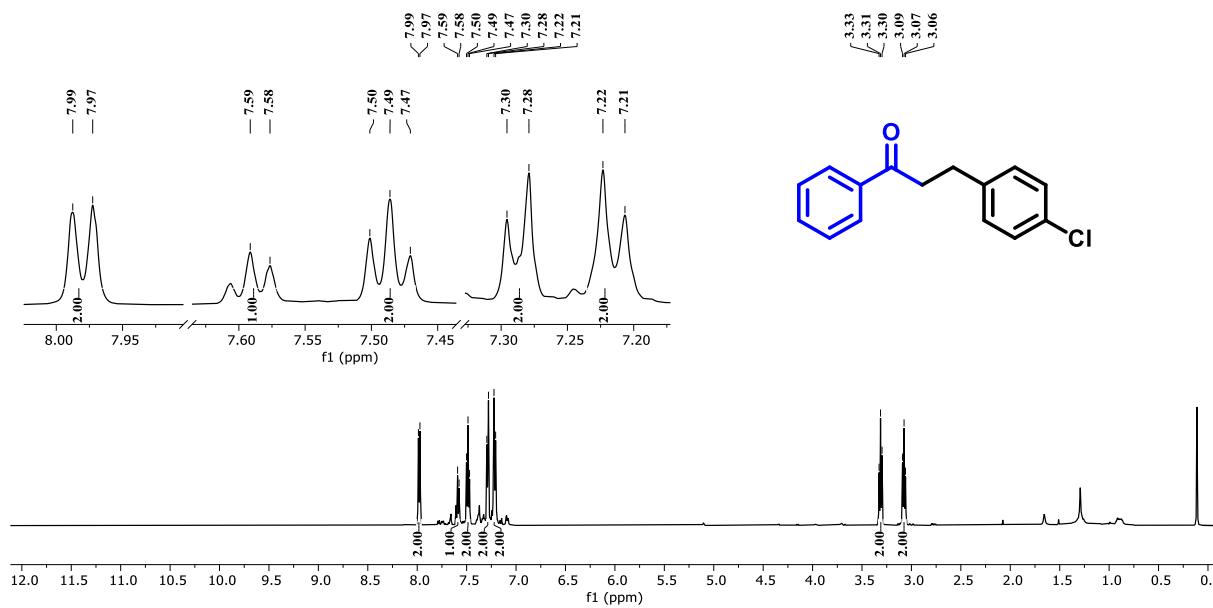

Fig. S95  $^1\text{H}$  NMR spectrum of **5p** in  $\text{CDCl}_3$  (500 MHz).

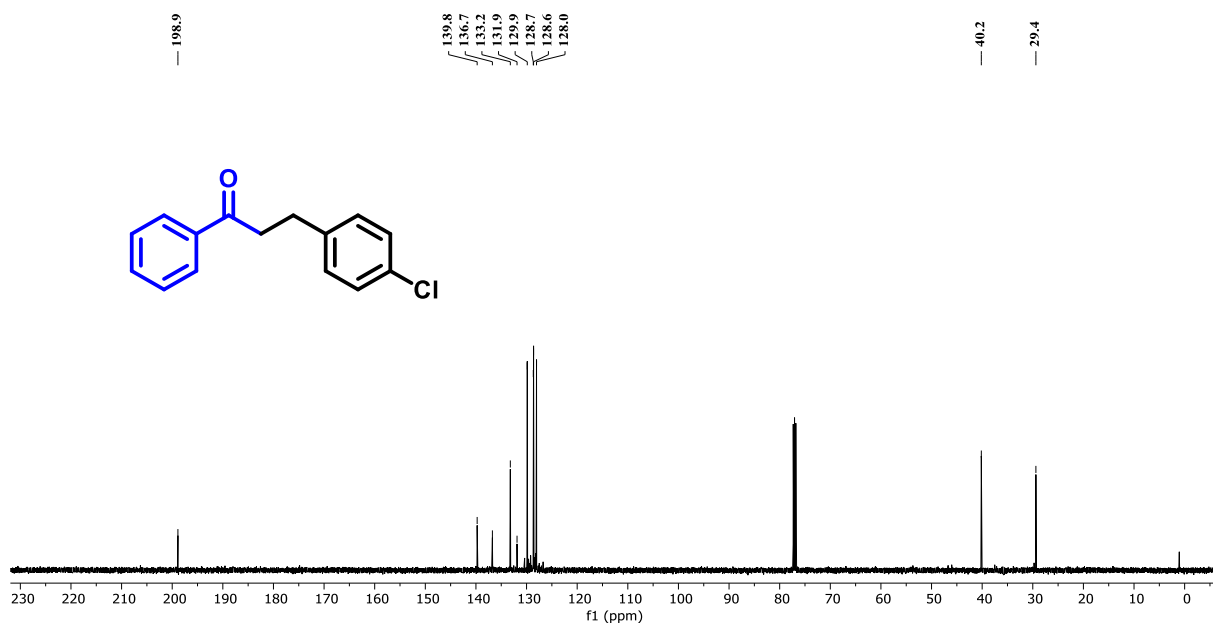

Fig. S96  $^{13}\text{C}\{^1\text{H}\}$  NMR spectrum of **5p** in  $\text{CDCl}_3$  (126 MHz).



**Sample Information**

|                       |                 |                           |                                                                           |
|-----------------------|-----------------|---------------------------|---------------------------------------------------------------------------|
| <b>Name</b>           | MSB-AP-NIL2-2   | <b>Data File Path</b>     | X:\Projects\MASS Data\Data\MSB-AP-NIL2-2.d                                |
| <b>Sample ID</b>      |                 | <b>Acq. Time (Local)</b>  | 12/29/2023 7:59:43 PM (UTC+05:30)                                         |
| <b>Instrument</b>     | LCMSQTOF-G6545B | <b>Method Path (Acq)</b>  | D:\Projects\MASS Data\Methods\A1B1_POS_100-2000_4000_2000_350_HIGH MASS.m |
| <b>MS Type</b>        | QTOF            | <b>Version (Acq SW)</b>   | 6200 series TOF/6500 series Q-TOF (11.0.203.0)                            |
| <b>Inj. Vol. (ul)</b> | 0.5             | <b>IRM Status</b>         | Success                                                                   |
| <b>Position</b>       | P2-E4           | <b>Method Path (DA)</b>   | D:\MassHunter\Report Templates\REPORT METHOD\HRMS_IITB.m                  |
| <b>Plate Pos.</b>     |                 | <b>Target Source Path</b> |                                                                           |
| <b>Operator</b>       | SYSTEM (SYSTEM) | <b>Result Summary</b>     | 1 qualified (1 targets)                                                   |

**Sample Spectra**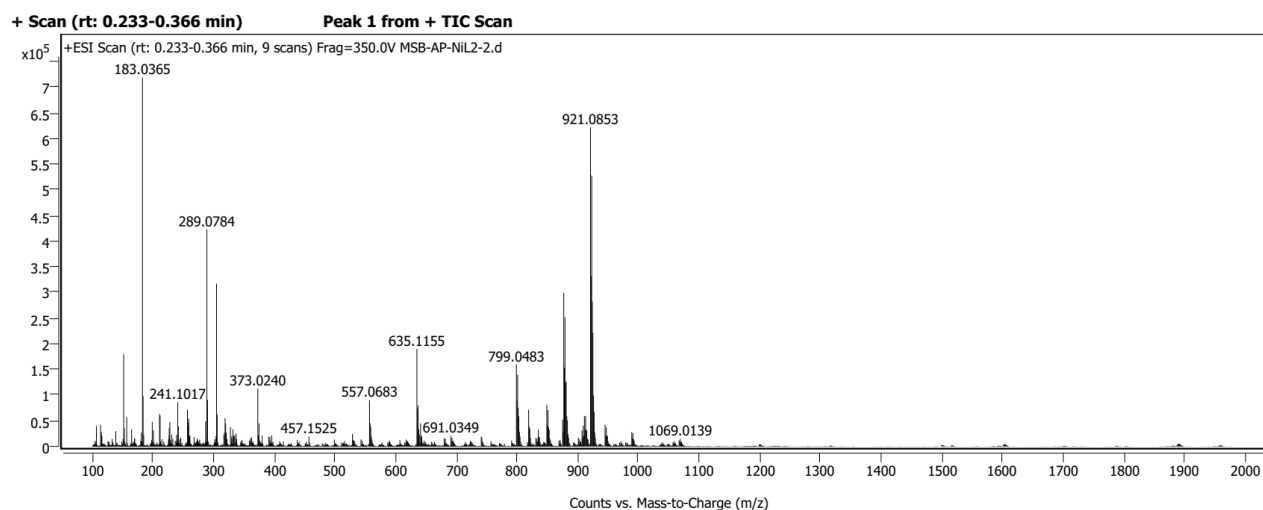**Compound Details**Cpd. 1: C<sub>48</sub>H<sub>36</sub>N<sub>4</sub>Ni<sub>2</sub>O<sub>2</sub>P<sub>2</sub>

| Formula                                                                                      | m/z      | Observed M/Z     | Difference Da     | Difference PPM    | Score |
|----------------------------------------------------------------------------------------------|----------|------------------|-------------------|-------------------|-------|
| C <sub>48</sub> H <sub>36</sub> N <sub>4</sub> Ni <sub>2</sub> O <sub>2</sub> P <sub>2</sub> | 901.0913 | 901.091328766957 | -2.91737806719539 | -3.32236792348117 | 78.51 |

**Compound Spectra (Zoomed)**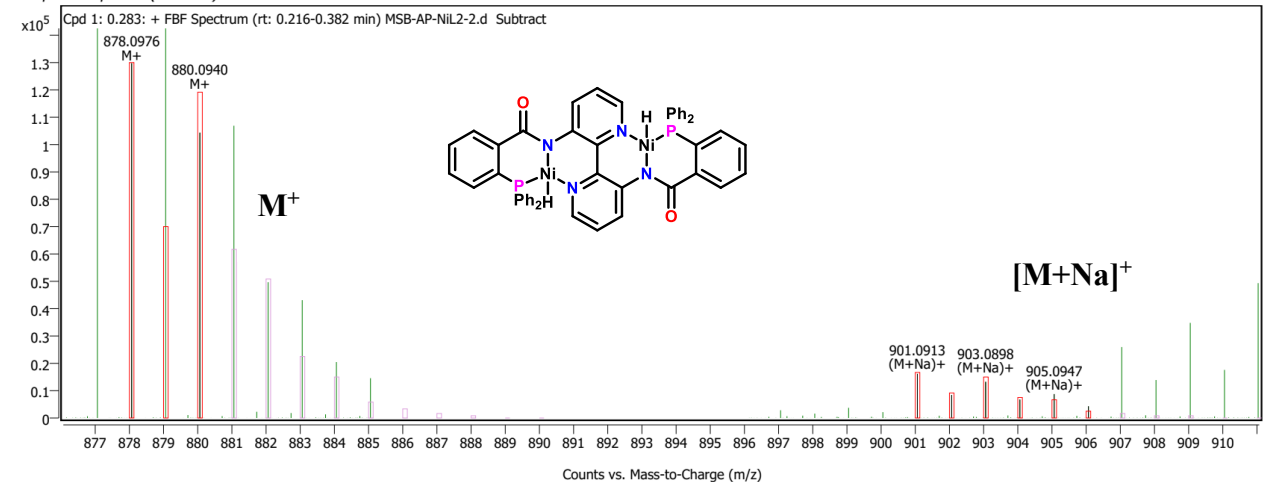

MassHunter Qual 10.0  
(End of Report)

**Fig. S97** HRMS spectrum of the Ni-Hydride intermediate (C).

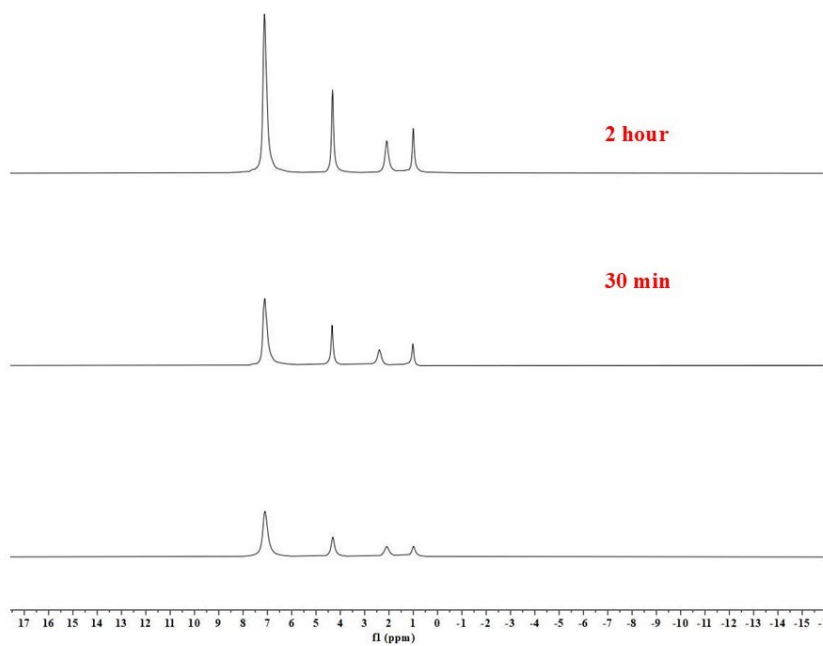

**Fig. S98** Satck  $^1\text{H}$  NMR spectrum of reaction mixture in  $\text{CDCl}_3$  (400 MHz).

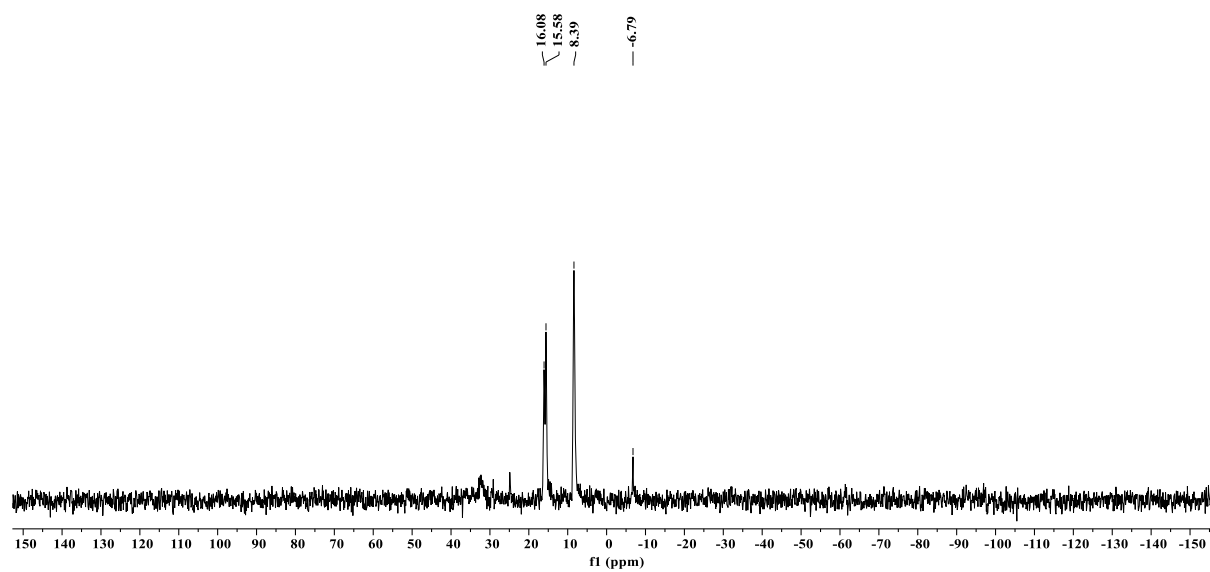

**Fig. S99**  $^{31}\text{P}$   $\{^1\text{H}\}$  NMR spectrum of reaction mixture in  $\text{CDCl}_3$  (202 MHz).

## References

1. O. V. Dolomanov, L. J. Bourhis, R. J. Gildea, J. A. K. Howard and H. Puschmann, *J. Appl. Crystallogr.*, 2009, **42**, 339-341.
2. G. Sheldrick, *Acta Crystallogr., Sect. A:*, 2015, **71**, 3-8.
3. G. Sheldrick, *Acta Crystallogr., Sect. C: Struct. Chem.*, 2015, **71**, 3-8.
4. C. Zhang, B. Hu, D. Chen and H. Xia, *Organometallics*, 2019, **38**, 3218-3226.
5. R. S. Sawatzky and M. Stradiotto, *Synlett*, 2018, **29**, 799-804.
6. A. Maji, A. Singh, N. Singh and K. Ghosh, *ChemCatChem* 2020, **12**, 3108-3125.
7. S. Y. Lee and C.-H. Cheon, *J. Org. Chem.*, 2018, **83**, 13036-13044.
8. S. Y. Lee, J. Jeon and C.-H. Cheon, *J. Org. Chem.*, 2018, **83**, 5177-5186.
9. D. Pathak, B. K. Kalita, A. Sarmah, H. Sharma, B. Bora, T. K. Goswami and B. Sarma, *Green Chem.*, 2023, **25**, 7642-7652.
10. H. Vander Mierde, P. Van Der Voort, D. De Vos and F. Verpoort, *Eur. J. Org. Chem.*, 2008, 1625-1631.
11. S. Nandi, I. Borthakur, K. Ganguli and S. Kundu, *Organometallics*, 2023, **42**, 1793-1802.
12. M. Tuan Ha, N. Thi Nguyen, N. Huyen Tran, Q. Viet Ho, N. Thi Son, V. H. Nguyen, H. Nguyen, D. Van Do, T. Quang Hung, B. Khanh Mai and T. Thanh Dang, *Chem Asian J.*, 2022, **17**, e202200909.
13. G. Zhang, J. Wu, H. Zeng, S. Zhang, Z. Yin and S. Zheng, *Org. Lett.*, 2017, **19**, 1080-1083.
14. W. Chang, X. Gong, S. Wang, L.-P. Xiao and G. Song, *Org. Biomol. Chem.*, 2017, **15**, 3466-3471.
15. D. Wu, Y. Wang, M. Li, L. Shi, J. Liu and N. Liu, *Appl. Organomet. Chem.*, 2022, **36**, e6493.
16. B. Ding, Z. Zhang, Y. Liu, M. Sugiya, T. Imamoto and W. Zhang, *Org. Lett.*, 2013, **15**, 3690-3693.
17. S. Pranesh Kavim and R. Ramesh, *Dalton Trans.*, 2023, **52**, 10038-10044.
18. Y. Qiu, Y. Zhang, L. Jin, L. Pan, G. Du, D. Ye and D. Wang, *Org. Chem. Front.*, 2019, **6**, 3420-3427.
